# Supplementary material
Source: PubMed Central journal article supplement (PMC9203701)

Supplementary Material  
For Murdock, et al. Impact of diagnostic genetics on remission MRD and transplantation  
outcomes in older AML patients

## Table of Contents

|                                                                                            |    |
|--------------------------------------------------------------------------------------------|----|
| Supplemental Methods .....                                                                 | 3  |
| Table S1. Number of patients enrolled by center .....                                      | 5  |
| Table S2. Characteristics of patients with and without remission samples .....             | 6  |
| Table S3. Genes sequenced on diagnostic panel.....                                         | 8  |
| Table S4. Genes sequenced on remission panel .....                                         | 8  |
| Table S5. Mutations detected at the time of diagnosis (and remission, if applicable) ..... | 9  |
| Table S6. Univariable molecular associations with outcomes.....                            | 24 |
| Table S7. Univariable non-genetic associations with leukemia-free survival.....            | 25 |
| Table S8. Score assigned based on hazard ratio.....                                        | 25 |
| Table S9. Cox frailty model for LFS incorporating both clinical and genetic factors .....  | 25 |
| Table S10. Non-genetic associations with relapse and NRM .....                             | 26 |
| Table S11. Assignment of prognostic groups based on score .....                            | 26 |
| Table S12. LFS, OS, Relapse, NRM for baseline prognostic groups .....                      | 26 |
| Table S13. Outcomes 3 years after transplant .....                                         | 27 |
| Table S14. Treatment-Emergent Mutations.....                                               | 28 |
| Table S15. Likelihood of mutation persistence by gene mutated at AML diagnosis.....        | 30 |
| Table S16. Comparison of molecular and flow-cytometry based MRD assessments.....           | 31 |
| Table S17. Univariable and multivariable associations with MRD positivity.....             | 31 |
| Figure S1. Post-transplant outcomes of the full cohort. ....                               | 32 |
| Figure S2. Outcomes by molecular risk group.....                                           | 33 |
| Figure S3. Likelihood of mutation persistence by gene using ELN definition of MRD .....    | 34 |
| Figure S4. Clonal abundance of persistent mutations .....                                  | 35 |
| Figure S5. Leukemia-free survival by MRD status using ELN definition. ....                 | 36 |
| Figure S6. Incidence of relapse using DTA as MRD-negative equivalent.....                  | 37 |

## Supplemental Methods

### *Library Construction, quantification, and normalization*

500ng genomic DNA was used as input for DNA fragmentation using a Covaris acoustic ultrasonicator, targeting 150 bp fragments. Library preparation was performed using the KAPA Biosystems (KAPA HyperPrep Kit with Library Amplification product KK8504) and IDT's duplex UMI adapters. The libraries were then paired with unique 8-base dual index sequences embedded within the p5 and p7 primers (IDT) during PCR. Enzymatic clean-ups were performed using Beckman Coulter AMPure XP beads. Libraries were quantified using the INvitrogen Quant-It broad range dsDNA quantification assay kit (Thermo Scientific) with a 1:200 PicoGreen dilution. Each library was normalized to 35ng/uL using Tris-HCl, 10 mM, pH 8.0.

### *Hybrid Selection, Cluster Amplification, and Sequencing*

In solution hybrid selection was performed using IDT's XGen hybridization and wash kit, with creation of 12-plex pre-hybridization pools. Custom exome bait (TWIST bioscience) was added to the lyophilized pool prior to resuspension, followed by library normalization and hybridization performed using a Hamilton Starlet liquid handling platform and target capture on an Agilent Bravo automated platform. Post capture, a PCR was performed to amplify the captured DNA. Cluster amplification using Exclusion Amplification cluster chemistry and HiSeq amplification was performed according to manufacturer's protocol (Illumina) and using HiSeq X flowcells. Flowcells were sequenced on v2 Sequencing-by-Synthesis chemistry for HiSeq X flowcells. The flowcells were then analyzed using RTA v.2.7.3 or later. Each pool of whole genome libraries was run on paired 151 bp runs, reading the dual-indexed sequences to identify molecular indices and sequenced across the number of lanes needed to meet coverage for all libraries in the pool.

### *Variant calling*

Reads were aligned with bwa-mem 0.7.15. Duplex consensus reads were called with fgbio 1.0 and realigned using bwa-mem. Consensus reads were required to have reads from both families  $\alpha\beta$  and  $\beta\alpha$ , and consensus reads with Ns in excess of 5% of bases were discarded. Read one and two were soft-clipped from the 5' end by 10 bases to reduce errors due to end repair. Single nucleotide and small insertion and deletion calling was performed with samtools-0.1.18 mpileup and Varscan 2.2.3. *FLT3*-ITDs were called as previously described.<sup>1</sup> Variants were annotated to include information about cDNA and amino acid changes, sequence depth, number, and percentage of reads supporting the variant allele, and population allele frequency in the Genome Aggregation Database (gnomAD). Variants were excluded if they had fewer than two total duplex-reassembled alternate reads at the position or fell outside of the target coordinates, caused synonymous changes, or were recurrent small insertions/deletions at low variant allele fraction adjacent to homopolymer repeat regions. Individual single nucleotide substitutions and small insertions or deletions were evaluated as candidate drivers of myeloid malignancies based on gene-specific characteristics, then curated manually and classified as driver mutations based on genetic criteria and literature review. All interpretation of variants was blinded to clinical characteristics and thus agnostic to variables including age, sex, diagnosis, treatment status, and clinical outcomes; the genetic analysis was completed and locked prior to merging with any clinical data.

### *Data Sharing*

All molecular data are contained in the manuscript and supplemental files.

### *Statistical Analysis*

In order to build a baseline mutational prognostic model, we first performed univariable Cox regression analysis for each mutation with at least 10 cases using a bootstrap validation method with 10,000 resamples of size 295 with replacement.<sup>2</sup> The bootstrap method was used to adjust the model in order to decrease the impact of overfitting to the original dataset and reducing the influence of unusual or outlying values. Although the split-sample method is commonly used for validation, it greatly reduces the sample size for both the training and validation sets; if the process is repeated with a different split, different regression coefficients may be obtained from the validation set. This is a concern particularly when the sample size is not large.<sup>2</sup> The bootstrap validation method overcomes these drawbacks and obtains nearly unbiased estimates without sacrificing sample.<sup>2</sup> Using this method, mutations with p-values less than 0.05 were selected and classified into favorable, intermediate, and unfavorable group according to their hazard ratios. Variables with HRs of 1 to 1.5 received 0.5 points, those with HRs of 1.5 to 2 received 1 point, those with HRs of 2 to 2.5 received 1.5 points, and those with HRs  $\geq 2.5$  received 2 points (table S8). We then performed multivariable Cox model adjusting for other non-genetic risk factors using the same bootstrap method to build a final prognostic model for LFS. Center effect was tested using a frailty model and center was adjusted in every model (table S9). We also utilized the Akaike information index (AIC) for the assessment of model fit and C-index<sup>3</sup> for predictive ability of models. For NRM and relapse, multivariable competing risks regression analysis (i.e., Fine and Gray model) for NRM and relapse were performed. For those patients who have samples at remission, the association between baseline genetic and clinical characteristics and the likelihood of MRD positivity at remission (modeled as a binary outcome, all clear/DT or MRD positive) was assessed using univariable and multivariable logistic regression analysis. Factors with p-value less than 0.05 from univariable logistic analysis were included in the multivariable analysis. Prior to analysis, collinearity among characteristics was assessed using correlation analysis and unsupervised hierarchical clustering analysis. Prior use of hypomethylation agent was correlated with secondary AML and cytogenetic risk was correlated with mutational risk. Since collinearity makes it difficult to estimate regression coefficients while holding (highly correlated) variables constant, we performed multivariable analysis including each of these prognostic variables separately but adjusting for all other variables. All P-values were two-sided at a significance level of 0.05. All calculations were performed using SAS 9.3 (SAS Institute, Inc., Cary, NC) and R version 3.3.2.

1. Tsai HK, Brackett DG, Szeto D, et al. Targeted Informatics for Optimal Detection, Characterization, and Quantification of FLT3 Internal Tandem Duplications Across Multiple Next-Generation Sequencing Platforms. *J. Mol. Diagn.* 2020;22(9):1162–1178.
2. Efron and Tibshirani (1993). *An Introduction to the Bootstrap*, Chapman & Hall/CRC
3. Harrell FE (2001). *Regression modeling strategies: with applications to linear models, logistic regression, and survival analysis*. Springer

Table S1. Number of patients enrolled by center

| Center                                   | Number Enrolled |
|------------------------------------------|-----------------|
| Dana-Farber Cancer Institute             | 104             |
| Johns Hopkins University                 | 58              |
| Memorial Sloan Kettering Cancer Center   | 21              |
| The Ohio State University                | 36              |
| Roswell Park Comprehensive Cancer Center | 48              |
| The University of Pennsylvania           | 28              |

Table S2. Characteristics of patients with and without remission samples

Comparisons of distributions are by the Wilcoxon rank-sum test. Comparisons of categorical variables in 2 groups are by Fisher's exact test and comparisons of more than 2 groups are by Chi square.

|                                  | CR sample  |           | No CR sample |           | P value |
|----------------------------------|------------|-----------|--------------|-----------|---------|
|                                  | N          | %         | N            | %         |         |
| <b>Full Cohort</b>               | <b>192</b> | <b>65</b> | <b>103</b>   | <b>35</b> | NA      |
| Recipient age, median (range)    | 66 (60-76) |           | 66 (60-74)   |           | 0.53    |
| Recipient sex                    |            |           |              |           | 0.17    |
| Female                           | 82         | 43        | 35           | 37        |         |
| Male                             | 110        | 57        | 68           | 66        |         |
| HCT-CI score                     |            |           |              |           | 0.97    |
| 0                                | 54         | 28        | 29           | 28        |         |
| 1                                | 52         | 27        | 29           | 28        |         |
| 3+                               | 76         | 40        | 44           | 43        |         |
| Missing                          | 7          | 4         | 4            | 4         |         |
| Type of AML (clinically defined) |            |           |              |           | 0.89    |
| <i>De novo</i>                   | 113        | 59        | 60           | 58        |         |
| Secondary                        | 60         | 31        | 31           | 30        |         |
| Therapy-related                  | 19         | 10        | 12           | 12        |         |
| Cytogenetics*                    |            |           |              |           | 0.16    |
| Normal                           | 85         | 44        | 51           | 50        |         |
| Core binding factor              | 2          | 1         | 4            | 3         |         |
| Complex karyotype                | 31         | 16        | 10           | 10        |         |
| Other                            | 74         | 39        | 38           | 37        |         |
| 2017 ELN risk group              |            |           |              |           | 0.98    |
| Favorable                        | 35         | 18        | 18           | 18        |         |
| Intermediate                     | 55         | 29        | 30           | 29        |         |
| Adverse                          | 100        | 52        | 52           | 51        |         |
| Missing                          | 3          | 2         | 2            | 2         |         |
| Initial therapy                  |            |           |              |           | 0.87    |
| Intensive induction              | 161        | 84        | 88           | 85        |         |
| Non-intensive induction          | 31         | 16        | 15           | 15        |         |
| Re-induction                     |            |           |              |           | 0.9     |
| Yes                              | 58         | 30        | 32           | 31        |         |
| No                               | 133        | 69        | 71           | 69        |         |
| Missing                          | 1          | 0.5       | 2            | 2         |         |
| Pre-transplant consolidation     |            |           |              |           | 0.8     |
| Yes                              | 121        | 63        | 63           | 61        |         |
| No                               | 71         | 37        | 40           | 39        |         |
| Remission quality                |            |           |              |           | 0.51    |
| CR with hematologic recovery     | 147        | 77        | 78           | 76        |         |
| CRi                              | 44         | 23        | 23           | 22        |         |

|                      |     |     |    |    |       |
|----------------------|-----|-----|----|----|-------|
| Missing              | 1   | 0.5 | 2  | 2  |       |
| Donor type           |     |     |    |    | 0.008 |
| Matched related      | 36  | 19  | 22 | 21 |       |
| Matched unrelated    | 106 | 55  | 68 | 66 |       |
| Mismatch related     | 2   | 1   | 0  | 0  |       |
| Mismatch unrelated   | 3   | 2   | 5  | 5  |       |
| Haploidentical       | 43  | 22  | 8  | 8  |       |
| Conditioning regimen |     |     |    |    | 0.005 |
| Myeloablative        | 11  | 6   | 17 | 16 |       |
| Reduced intensity    | 181 | 94  | 86 | 84 |       |
| Stem cell source     |     |     |    |    | 0.003 |
| Peripheral blood     | 132 | 69  | 84 | 82 |       |
| Bone marrow          | 57  | 30  | 14 | 14 |       |
| Umbilical cord blood | 3   | 1.5 | 5  | 5  |       |
| Molecular Risk       |     |     |    |    | 0.67  |
| Favorable            | 65  | 34  | 30 | 29 |       |
| Intermediate         | 86  | 45  | 51 | 50 |       |
| Unfavorable          | 41  | 21  | 22 | 21 |       |
| Molecular Ontogeny   |     |     |    |    | 0.81  |
| <i>De Novo</i>       | 86  | 45  | 49 | 48 |       |
| Secondary            | 83  | 43  | 44 | 43 |       |
| p53                  | 23  | 12  | 10 | 10 |       |
| Overall Risk         |     |     |    |    | 0.76  |
| Low                  | 24  | 13  | 12 | 12 |       |
| Intermediate         | 79  | 41  | 37 | 36 |       |
| High                 | 40  | 21  | 26 | 25 |       |
| Very High            | 49  | 26  | 28 | 27 |       |

Table S3. Genes sequenced on diagnostic panel.

|        |         |         |        |         |
|--------|---------|---------|--------|---------|
| ACD    | CSNK1A1 | KDM6A   | PHF6   | SRSF2   |
| ASXL1  | CTC1    | KDM6B   | POT1   | STAG2   |
| ASXL2  | CTCF    | KIT     | PPM1D  | STAT3   |
| ATM    | CUX1    | KRAS    | PRPF8  | STAT5B  |
| ATR    | DDX41   | MBD4    | PTPN11 | SUZ12   |
| ATRX   | DKC1    | MDM2    | RAD21  | TEN1    |
| BAP1   | DNMT3A  | MLL-PTD | RING1  | TERF1   |
| BCOR   | EED     | MPL     | RIT1   | TERF2   |
| BCORL1 | EP300   | MYC     | RNF2   | TERF2IP |
| BRAF   | ETNK1   | MYD88   | RTEL1  | TERT    |
| BRCA1  | ETV6    | NAF1    | RUNX1  | TERC    |
| BRCA2  | EZH1    | NF1     | RYBP   | TET2    |
| BRCC3  | EZH2    | NFE2    | SAMD9  | TINF2   |
| BRIP1  | FLT3    | NHP2    | SAMD9L | TP53    |
| CALR   | GATA2   | NOP10   | SBDS   | U2AF1   |
| CBL    | GNAS    | NOTCH1  | SETBP1 | USP7    |
| CDA    | GNB1    | NPM1    | SETD2  | WRAP53  |
| CDKN2A | IDH1    | NRAS    | SF3B1  | WT1     |
| CDKN2B | IDH2    | NSD2    | SH2B3  | ZBTB33  |
| CEBPA  | IKZF1   | OBFC1   | SKP1   | ZNF318  |
| CHEK2  | JAK2    | PARN    | SMC1A  | ZRSR2   |
| CREBBP | KDM2B   | PCGF1   | SMC3   |         |
| CSF3R  | KDM5A   | PDS5B   | SRCAP  |         |

Table S4. Genes sequenced on remission panel

|         |        |        |        |        |
|---------|--------|--------|--------|--------|
| ASXL1   | DDX41  | KDM2B  | RAD21  | SRSF2  |
| ASXL2   | DKC1   | KIT    | RING1  | STAG2  |
| ATM     | DNMT3A | KRAS   | RIT1   | STAT3  |
| ATRX    | EIF6   | MDM2   | RNF2   | STAT5B |
| BCOR    | EP300  | MPL    | RTEL1  | TERT   |
| BCORL1  | ETNK1  | MYC    | RUNX1  | TET2   |
| BRAF    | ETV6   | NF1    | SAMD9  | TP53   |
| BRCC3   | EZH2   | NOTCH1 | SAMD9L | U2AF1  |
| CALR    | FLT3   | NPM1   | SBDS   | USP7   |
| CBL     | GATA2  | NRAS   | SETBP1 | WT1    |
| CEBPA   | GNAS   | PCGF1  | SETD2  | ZBTB33 |
| CREBBP  | GNB1   | PDS5B  | SF3B1  | ZRSR2  |
| CSF3R   | IDH1   | PHF6   | SH2B3  |        |
| CSNK1A1 | IDH2   | PPM1D  | SKP1   |        |
| CTCF    | IKZF1  | PRPF8  | SMC1A  |        |
| CUX1    | JAK2   | PTPN11 | SMC3   |        |



Table S5. Mutations detected at the time of diagnosis (and remission, if applicable)

| subject_id | chrom:pos_start | ref | var | gene  | cdna            | aa          | Result               | Diagnostic VAF | Depth | Remission Sample | Detected in Remission | Remission VAF |
|------------|-----------------|-----|-----|-------|-----------------|-------------|----------------------|----------------|-------|------------------|-----------------------|---------------|
| OAML174    | chr20:31021625  | -   | TTG | ASXL1 | c.1624_1625insT | p.L542fs    | frameshift insertion | 0.426          | 857   | No               | -                     | -             |
| OAML311    | Chr20:31022271  | A   | T   | ASXL1 | c.A1756T        | p.K586X     | stopgain             | 0.070          | 627   | No               | -                     | -             |
| OAML158    | chr20:31022284  | -   | T   | ASXL1 | c.1770dupT      | p.T590fs    | frameshift insertion | 0.397          | 1026  | Yes              | Yes                   | 0.361         |
| OAML074    | chr20:31022286  | -   | A   | ASXL1 | c.1772dupA      | p.Y591_Q591 | stopgain             | 0.236          | 783   | No               | -                     | -             |
| OAML057    | chr20:31022288  | C   | G   | ASXL1 | c.C1773G        | p.Y591X     | stopgain             | 0.368          | 922   | Yes              | Yes                   | 0.038         |
| OAML068    | Chr20:31022365  | 0   | -   | ASXL1 | c.1850_1851del  | p.I617fs    | frameshift deletion  | 0.451          | 412   | Yes              | Yes                   | 0.337         |
| OAML290    | Chr20:31022367  | A   | T   | ASXL1 | c.A1852T        | p.K618X     | stopgain             | 0.437          | 678   | Yes              | No                    | 0.000         |
| OAML001    | chr20:31022402  | 0   | -   | ASXL1 | c.1887_1909del  | p.G629fs    | frameshift deletion  | 0.139          | 2133  | Yes              | No                    | 0.000         |
| OAML144    | chr20:31022402  | 0   | -   | ASXL1 | c.1887_1909del  | p.G629fs    | frameshift deletion  | 0.278          | 710   | Yes              | Yes                   | 0.000         |
| OAML205    | chr20:31022402  | 0   | -   | ASXL1 | c.1887_1909del  | p.G629fs    | frameshift deletion  | 0.385          | 1029  | No               | -                     | -             |
| OAML230    | chr20:31022402  | 0   | -   | ASXL1 | c.1887_1909del  | p.G629fs    | frameshift deletion  | 0.328          | 801   | Yes              | No                    | 0.000         |
| OAML293    | Chr20:31022402  | 0   | -   | ASXL1 | c.1887_1909del  | p.G629fs    | frameshift deletion  | 0.280          | 832   | No               | -                     | -             |
| OAML054    | chr20:31022414  | 0   | -   | ASXL1 | c.1899_1900del  | p.H633fs    | frameshift deletion  | 0.289          | 958   | No               | -                     | -             |
| OAML051    | chr20:31022416  | G   | -   | ASXL1 | c.1901delG      | p.R634fs    | frameshift deletion  | 0.090          | 679   | Yes              | Yes                   | 0.078         |
| OAML099    | chr20:31022416  | G   | -   | ASXL1 | c.1901delG      | p.R634fs    | frameshift deletion  | 0.113          | 1476  | Yes              | Yes                   | 0.001         |
| OAML168    | chr20:31022416  | G   | -   | ASXL1 | c.1901delG      | p.R634fs    | frameshift deletion  | 0.094          | 608   | No               | -                     | -             |
| OAML237    | chr20:31022416  | G   | -   | ASXL1 | c.1901delG      | p.R634fs    | frameshift deletion  | 0.067          | 505   | Yes              | Yes                   | 0.011         |
| OAML256    | chr20:31022416  | G   | -   | ASXL1 | c.1901delG      | p.R634fs    | frameshift deletion  | 0.066          | 651   | Yes              | Yes                   | 0.004         |
| OAML007    | chr20:31022441  | -   | G   | ASXL1 | c.1927dupG      | p.G642fs    | frameshift insertion | 0.337          | 846   | Yes              | Yes                   | 0.014         |
| OAML024    | chr20:31022441  | -   | G   | ASXL1 | c.1927dupG      | p.G642fs    | frameshift insertion | 0.276          | 994   | No               | -                     | -             |
| OAML030    | Chr20:31022441  | -   | G   | ASXL1 | c.1927dupG      | p.G642fs    | frameshift insertion | 0.333          | 707   | No               | -                     | -             |
| OAML035    | chr20:31022441  | -   | G   | ASXL1 | c.1927dupG      | p.G642fs    | frameshift insertion | 0.263          | 732   | Yes              | Yes                   | 0.146         |
| OAML038    | chr20:31022441  | -   | G   | ASXL1 | c.1927dupG      | p.G642fs    | frameshift insertion | 0.361          | 629   | Yes              | Yes                   | 0.361         |
| OAML064    | chr20:31022441  | -   | G   | ASXL1 | c.1927dupG      | p.G642fs    | frameshift insertion | 0.076          | 841   | Yes              | No                    | 0.000         |
| OAML076    | Chr20:31022441  | -   | G   | ASXL1 | c.1927dupG      | p.G642fs    | frameshift insertion | 0.351          | 741   | Yes              | Yes                   | 0.316         |
| OAML076    | Chr20:31022441  | -   | G   | ASXL1 | c.1927dupG      | p.G642fs    | frameshift insertion | 0.351          | 741   | Yes              | Yes                   | 0.316         |
| OAML088    | chr20:31022441  | -   | G   | ASXL1 | c.1927dupG      | p.G642fs    | frameshift insertion | 0.107          | 909   | Yes              | Yes                   | 0.004         |
| OAML110    | chr20:31022441  | -   | G   | ASXL1 | c.1927dupG      | p.G642fs    | frameshift insertion | 0.147          | 739   | No               | -                     | -             |
| OAML113    | chr20:31022441  | -   | G   | ASXL1 | c.1927dupG      | p.G642fs    | frameshift insertion | 0.119          | 903   | Yes              | No                    | 0.000         |
| OAML121    | chr20:31022441  | -   | G   | ASXL1 | c.1927dupG      | p.G642fs    | frameshift insertion | 0.441          | 1220  | Yes              | Yes                   | 0.211         |
| OAML122    | chr20:31022441  | -   | G   | ASXL1 | c.1927dupG      | p.G642fs    | frameshift insertion | 0.294          | 1058  | Yes              | Yes                   | 0.018         |
| OAML127    | chr20:31022441  | -   | G   | ASXL1 | c.1927dupG      | p.G642fs    | frameshift insertion | 0.389          | 906   | Yes              | Yes                   | 0.430         |
| OAML138    | chr20:31022441  | -   | G   | ASXL1 | c.1927dupG      | p.G642fs    | frameshift insertion | 0.374          | 1188  | Yes              | Yes                   | 0.323         |
| OAML139    | chr20:31022441  | -   | G   | ASXL1 | c.1927dupG      | p.G642fs    | frameshift insertion | 0.406          | 933   | Yes              | Yes                   | 0.005         |
| OAML142    | chr20:31022441  | -   | G   | ASXL1 | c.1927dupG      | p.G642fs    | frameshift insertion | 0.384          | 954   | No               | -                     | -             |
| OAML143    | chr20:31022441  | -   | G   | ASXL1 | c.1927dupG      | p.G642fs    | frameshift insertion | 0.310          | 843   | No               | -                     | -             |
| OAML160    | chr20:31022441  | -   | G   | ASXL1 | c.1927dupG      | p.G642fs    | frameshift insertion | 0.292          | 1367  | No               | -                     | -             |
| OAML178    | chr20:31022441  | -   | G   | ASXL1 | c.1927dupG      | p.G642fs    | frameshift insertion | 0.308          | 710   | No               | -                     | -             |
| OAML179    | chr20:31022441  | -   | G   | ASXL1 | c.1927dupG      | p.G642fs    | frameshift insertion | 0.338          | 706   | Yes              | Yes                   | 0.141         |
| OAML191    | chr20:31022441  | -   | G   | ASXL1 | c.1927dupG      | p.G642fs    | frameshift insertion | 0.380          | 744   | No               | -                     | -             |
| OAML192    | chr20:31022441  | -   | G   | ASXL1 | c.1927dupG      | p.G642fs    | frameshift insertion | 0.040          | 612   | Yes              | Yes                   | 0.003         |
| OAML226    | chr20:31022441  | -   | G   | ASXL1 | c.1927dupG      | p.G642fs    | frameshift insertion | 0.137          | 507   | No               | -                     | -             |
| OAML238    | chr20:31022441  | -   | G   | ASXL1 | c.1927dupG      | p.G642fs    | frameshift insertion | 0.035          | 754   | Yes              | Yes                   | 0.069         |
| OAML253    | chr20:31022441  | -   | G   | ASXL1 | c.1927dupG      | p.G642fs    | frameshift insertion | 0.364          | 864   | Yes              | Yes                   | 0.365         |
| OAML254    | chr20:31022441  | -   | G   | ASXL1 | c.1927dupG      | p.G642fs    | frameshift insertion | 0.338          | 895   | Yes              | Yes                   | 0.310         |
| OAML271    | chr20:31022441  | -   | G   | ASXL1 | c.1927dupG      | p.G642fs    | frameshift insertion | 0.398          | 765   | Yes              | Yes                   | 0.005         |
| OAML313    | Chr20:31022441  | -   | G   | ASXL1 | c.1927dupG      | p.G642fs    | frameshift insertion | 0.149          | 921   | No               | -                     | -             |
| OAML145    | chr20:31022457  | 0   | -   | ASXL1 | c.1942_1943del  | p.G648fs    | frameshift deletion  | 0.300          | 1101  | Yes              | Yes                   | 0.032         |
| OAML167    | chr20:31022499  | 0   | -   | ASXL1 | c.1984_1994del  | p.G662fs    | frameshift deletion  | 0.463          | 693   | No               | -                     | -             |
| OAML065    | chr20:31022643  | G   | T   | ASXL1 | c.G2128T        | p.G710X     | stopgain             | 0.049          | 1237  | Yes              | No                    | 0.000         |
| OAML274    | chr20:31022768  | -   | G   | ASXL1 | c.2254dupG      | p.V751fs    | frameshift insertion | 0.333          | 991   | Yes              | Yes                   | 0.233         |
| OAML301    | Chr20:31022817  | C   | T   | ASXL1 | c.C2302T        | p.Q788X     | stopgain             | 0.205          | 1075  | No               | -                     | -             |
| OAML063    | Chr20:31022837  | A   | -   | ASXL1 | c.2322delA      | p.R774fs    | frameshift deletion  | 0.410          | 571   | Yes              | No                    | 0.000         |
| OAML207    | chr20:31022853  | C   | T   | ASXL1 | c.C2338T        | p.Q780X     | stopgain             | 0.070          | 1023  | No               | -                     | -             |
| OAML247    | chr20:31022853  | C   | T   | ASXL1 | c.C2338T        | p.Q780X     | stopgain             | 0.355          | 1024  | Yes              | Yes                   | 0.089         |
| OAML055    | chr20:31022916  | G   | T   | ASXL1 | c.G2401T        | p.E801X     | stopgain             | 0.186          | 853   | Yes              | Yes                   | 0.165         |
| OAML201    | chr20:31022936  | T   | -   | ASXL1 | c.2421delT      | p.V807fs    | frameshift deletion  | 0.463          | 1230  | No               | -                     | -             |
| OAML188    | chr20:31022958  | C   | -   | ASXL1 | c.2443delC      | p.L815fs    | frameshift deletion  | 0.442          | 966   | No               | -                     | -             |
| OAML322    | Chr20:31023153  | A   | -   | ASXL1 | c.2638delA      | p.T880fs    | frameshift deletion  | 0.258          | 1225  | No               | -                     | -             |
| OAML213    | chr20:31023277  | -   | T   | ASXL1 | c.2763dupT      | p.S921fs    | frameshift insertion | 0.802          | 614   | No               | -                     | -             |
| OAML250    | chr20:31023394  | G   | A   | ASXL1 | c.G2879A        | p.W960X     | stopgain             | 0.477          | 849   | Yes              | No                    | 0.000         |
| OAML238    | chr20:31023408  | C   | T   | ASXL1 | c.C2893T        | p.R965X     | stopgain             | 0.401          | 918   | Yes              | Yes                   | 0.027         |
| OAML203    | chr20:31023498  | -   | A   | ASXL1 | c.2984dupA      | p.H995fs    | frameshift insertion | 0.350          | 960   | No               | -                     | -             |
| OAML180    | chr20:31024636  | -   | G   | ASXL1 | c.4122dupG      | p.V1374fs   | frameshift insertion | 0.464          | 734   | No               | -                     | -             |
| OAML190    | Chr2:25966872   | T   | -   | ASXL2 | c.2334delA      | p.P778fs    | frameshift deletion  | 0.292          | 870   | No               | -                     | -             |
| OAML309    | Chr2:25967031   | C   | -   | ASXL2 | c.2175delG      | p.K725fs    | frameshift deletion  | 0.044          | 994   | No               | -                     | -             |
| OAML098    | chr2:25967233   | -   | C   | ASXL2 | c.1972dupG      | p.A658fs    | frameshift insertion | 0.424          | 770   | Yes              | Yes                   | 0.001         |
| OAML118    | chr2:25967233   | -   | C   | ASXL2 | c.1972dupG      | p.A658fs    | frameshift insertion | 0.447          | 789   | Yes              | Yes                   | 0.026         |
| OAML005    | chr2:25967279   | -   | A   | ASXL2 | c.1926dupT      | p.P643fs    | frameshift insertion | 0.345          | 764   | Yes              | No                    | 0.000         |
| OAML217    | chr2:25972652   | -   | GGG | ASXL2 | c.1772_1773insT | p.R591fs    | frameshift insertion | 0.424          | 999   | No               | -                     | -             |
| OAML222    | chr2:25973115   | T   | -   | ASXL2 | c.1310delA      | p.Q437fs    | frameshift deletion  | 0.239          | 915   | No               | -                     | -             |
| OAML025    | chr2:25973179   | C   | A   | ASXL2 | c.G1246T        | p.E416X     | stopgain             | 0.424          | 1031  | Yes              | No                    | 0.000         |
| OAML274    | chrX:39911489   | -   | C   | BCOR  | c.5140dupG      | p.E1714fs   | frameshift insertion | 0.106          | 360   | Yes              | Yes                   | 0.005         |
| OAML054    | chrX:39913252   | T   | -   | BCOR  | c.4863delA      | p.P1621fs   | frameshift deletion  | 0.522          | 452   | No               | -                     | -             |
| OAML231    | chrX:39913252   | T   | -   | BCOR  | c.4863delA      | p.P1621fs   | frameshift deletion  | 0.898          | 442   | Yes              | Yes                   | 0.003         |

| subject_id | chrom:pos_start | ref | var | gene   | cdna            | aa           | Result                  | Diagnostic VAF | Depth | Remission Sample | Detected in Remission | Remission VAF |
|------------|-----------------|-----|-----|--------|-----------------|--------------|-------------------------|----------------|-------|------------------|-----------------------|---------------|
| OAML057    | chrX:39913528   | -   | CGG | BCOR   | c.4799_4800insC | p.F1600fs    | frameshift insertion    | 0.163          | 613   | Yes              | No                    | 0.000         |
| OAML258    | chrX:39913528   | -   | A   | BCOR   | c.4799dupT      | p.F1600fs    | frameshift insertion    | 0.297          | 623   | Yes              | Yes                   | 0.001         |
| OAML199    | chrX:39913588   | T   | C   | BCOR   | c.4640-2A>G     |              | splicing                | 0.324          | 102   | Yes              | No                    | 0.000         |
| OAML274    | chrX:39914723   | G   | A   | BCOR   | c.C4639T        | p.R1547X     | stopgain                | 0.064          | 376   | Yes              | Yes                   | 0.006         |
| OAML155    | chrX:39914767   | C   | T   | BCOR   | c.4494-1G>A     |              | splicing                | 0.904          | 500   | Yes              | Yes                   | 0.003         |
| OAML303    | ChrX:39916415   | -   | AT  | BCOR   | c.4587_4588insA | p.G1530fs    | frameshift insertion    | 0.668          | 310   | No               | -                     | -             |
| OAML274    | chrX:39916531   | -   | G   | BCOR   | c.4471_4472insC | p.N1491fs    | frameshift insertion    | 0.190          | 437   | Yes              | Yes                   | 0.029         |
| OAML025    | chrX:39921391   | C   | T   | BCOR   | c.4326+1G>A     |              | splicing                | 0.881          | 236   | Yes              | No                    | 0.000         |
| OAML280    | chrX:39921391   | C   | T   | BCOR   | c.4326+1G>A     |              | splicing                | 0.915          | 317   | Yes              | Yes                   | 0.378         |
| OAML153    | chrX:39921457   | T   | A   | BCOR   | c.A4363T        | p.R1455X     | stopgain                | 0.932          | 395   | Yes              | Yes                   | 0.655         |
| OAML327    | ChrX:39921997   | A   | C   | BCOR   | c.4071+2T>G     |              | splicing                | 0.205          | 313   | No               | -                     | -             |
| OAML046    | chrX:39922123   | -   | A   | BCOR   | c.4048dupT      | p.Y1350fs    | frameshift insertion    | 0.287          | 859   | Yes              | No                    | 0.000         |
| OAML284    | ChrX:39923086   | G   | -   | BCOR   | c.3622delC      | p.Q1208fs    | frameshift deletion     | 0.118          | 366   | Yes              | Yes                   | 0.001         |
| OAML117    | chrX:39931848   | -   | GA  | BCOR   | c.2750_2751insT | p.T917fs     | frameshift insertion    | 0.789          | 576   | Yes              | No                    | 0.000         |
| OAML064    | chrX:39931993   | 0   | -   | BCOR   | c.2605_2606del  | p.Y869fs     | frameshift deletion     | 0.079          | 1009  | Yes              | Yes                   | 0.001         |
| OAML023    | chrX:39931996   | G   | -   | BCOR   | c.2603delC      | p.T868fs     | frameshift deletion     | 0.883          | 686   | Yes              | Yes                   | 0.004         |
| OAML285    | ChrX:39932074   | -   | CTG | BCOR   | c.2524_2525insC | p.V842fs     | frameshift insertion    | 0.531          | 226   | Yes              | No                    | 0.000         |
| OAML064    | chrX:39932171   | G   | A   | BCOR   | c.C2428T        | p.R810X      | stopgain                | 0.022          | 1035  | Yes              | No                    | 0.000         |
| OAML146    | chrX:39932868   | A   | -   | BCOR   | c.1731delT      | p.N577fs     | frameshift deletion     | 0.401          | 1164  | Yes              | No                    | 0.000         |
| OAML139    | chrX:39932984   | G   | A   | BCOR   | c.C1615T        | p.Q539X      | stopgain                | 0.087          | 588   | Yes              | No                    | 0.000         |
| OAML017    | chrX:39933205   | A   | -   | BCOR   | c.1394delT      | p.V465fs     | frameshift deletion     | 0.614          | 399   | Yes              | Yes                   | 0.671         |
| OAML274    | chrX:39933301   | -   | TGG | BCOR   | c.1297_1298insC | p.T433fs     | frameshift insertion    | 0.084          | 488   | Yes              | Yes                   | 0.007         |
| OAML238    | chrX:39933505   | -   | TA  | BCOR   | c.1093_1094insT | p.S365fs     | frameshift insertion    | 0.666          | 410   | Yes              | No                    | 0.000         |
| OAML309    | ChrX:39933593   | -   | G   | BCOR   | c.1005dupC      | p.S336fs     | frameshift insertion    | 0.265          | 977   | No               | -                     | -             |
| OAML166    | chrX:39934027   | C   | T   | BCOR   | c.G572A         | p.W191X      | stopgain                | 0.829          | 368   | No               | -                     | -             |
| OAML025    | chrX:129148573  | C   | T   | BCORL1 | c.C1825T        | p.R609X      | stopgain                | 0.680          | 572   | Yes              | No                    | 0.000         |
| OAML263    | chrX:129149098  | C   | T   | BCORL1 | c.C2350T        | p.R784X      | stopgain                | 0.132          | 509   | Yes              | No                    | 0.000         |
| OAML066    | chrX:129155008  | -   | G   | BCORL1 | c.3491dupG      | p.R1164fs    | frameshift insertion    | 0.264          | 857   | Yes              | Yes                   | 0.022         |
| OAML219    | chrX:129159072  | C   | T   | BCORL1 | c.C3796T        | p.R1266X     | stopgain                | 0.024          | 554   | No               | -                     | -             |
| OAML263    | chrX:129159150  | C   | T   | BCORL1 | c.C3874T        | p.R1292X     | stopgain                | 0.049          | 470   | Yes              | Yes                   | 0.001         |
| OAML117    | chrX:129159171  | C   | T   | BCORL1 | c.C3895T        | p.R1299X     | stopgain                | 0.859          | 516   | Yes              | No                    | 0.000         |
| OAML255    | chrX:129159270  | C   | T   | BCORL1 | c.C3994T        | p.R1332X     | stopgain                | 0.470          | 837   | Yes              | Yes                   | 0.003         |
| OAML258    | chrX:129159270  | C   | T   | BCORL1 | c.C3994T        | p.R1332X     | stopgain                | 0.080          | 893   | Yes              | No                    | 0.000         |
| OAML285    | ChrX:129162788  | -   | AG  | BCORL1 | c.4257_4258insA | p.K1419fs    | frameshift insertion    | 0.614          | 69    | Yes              | No                    | 0.000         |
| OAML303    | ChrX:129162837  | G   | A   | BCORL1 | c.4305+1G>A     |              | splicing                | 0.588          | 160   | No               | -                     | -             |
| OAML219    | chrX:129171479  | -   | GCT | BCORL1 | c.4443_4444insC | p.N1481fs    | frameshift insertion    | 0.092          | 508   | No               | -                     | -             |
| OAML003    | chr7:140453136  | A   | T   | BRAF   | c.T1799A        | p.V600E      | nonsynonymous SNV       | 0.432          | 790   | Yes              | No                    | 0.000         |
| OAML329    | Chr7:140453136  | A   | T   | BRAF   | c.T1799A        | p.V600E      | nonsynonymous SNV       | 0.063          | 382   | No               | -                     | -             |
| OAML174    | chr7:140453154  | T   | C   | BRAF   | c.A1781G        | p.D594G      | nonsynonymous SNV       | 0.507          | 713   | No               | -                     | -             |
| OAML143    | chrX:154299839  | 0   | -   | BRCC3  | c.37_44del      | p.H13fs      | frameshift deletion     | 0.702          | 248   | No               | -                     | -             |
| OAML263    | chrX:154305490  | C   | T   | BRCC3  | c.C244T         | p.R82X       | stopgain                | 0.057          | 314   | Yes              | No                    | 0.000         |
| OAML020    | chrX:154348273  | G   | A   | BRCC3  | c.728-1G>A      |              | splicing                | 0.039          | 333   | Yes              | No                    | 0.000         |
| OAML119    | chr19:13054571  | -   | A   | CALR   | c.1098_1099insA | p.L367fs*46  | frameshift insertion    | 0.251          | 430   | Yes              | No                    | 0.000         |
| OAML169    | chr19:13054571  | -   | A   | CALR   | c.1098_1099insA | p.L367fs*46  | frameshift insertion    | 0.634          | 123   | No               | -                     | -             |
| OAML243    | chr11:119148546 | G   | C   | CBL    | c.G1087C        | p.V363L      | nonsynonymous SNV       | 0.095          | 728   | Yes              | Yes                   | 0.012         |
| OAML183    | chr11:119148553 | A   | G   | CBL    | c.A1094G        | p.Q365R      | nonsynonymous SNV       | 0.438          | 626   | No               | -                     | -             |
| OAML280    | chr11:119148919 | T   | C   | CBL    | c.T1139C        | p.L380P      | nonsynonymous SNV       | 0.080          | 661   | Yes              | No                    | 0.000         |
| OAML226    | chr11:119148931 | G   | A   | CBL    | c.G1151A        | p.C384Y      | nonsynonymous SNV       | 0.156          | 410   | No               | -                     | -             |
| OAML080    | Chr11:119148948 | G   | T   | CBL    | c.G1168T        | p.D390Y      | nonsynonymous SNV       | 0.138          | 549   | Yes              | No                    | 0.000         |
| OAML099    | chr11:119148949 | A   | T   | CBL    | c.A1169T        | p.D390V      | nonsynonymous SNV       | 0.049          | 510   | Yes              | No                    | 0.000         |
| OAML072    | Chr11:119148991 | G   | A   | CBL    | c.G1211A        | p.C404Y      | nonsynonymous SNV       | 0.717          | 152   | Yes              | Yes                   | 0.187         |
| OAML057    | chr11:119149004 | 0   | -   | CBL    | c.1224_1225del  | p.W408fs     | frameshift deletion     | 0.029          | 727   | Yes              | No                    | 0.000         |
| OAML058    | chr19:33792257  | C   | G   | CEBPA  | c.G707C         | p.G236A      | nonsynonymous SNV       | 0.192          | 665   | Yes              | No                    | 0.000         |
| OAML162    | chr19:33792371  | A   | T   | CEBPA  | c.T593A         | p.L198fs*52  | frameshift deletion     | 0.057          | 1148  | Yes              | No                    | 0.000         |
| OAML192    | chr19:33792386  | T   | G   | CEBPA  | c.A935C         | p.Q312P      | nonsynonymous SNV       | 0.413          | 504   | Yes              | No                    | 0.000         |
| OAML183    | chr19:33792403  | -   | CGC | CEBPA  | c.917_918insGC  | p.R306delins | nonframeshift insertion | 0.486          | 627   | No               | -                     | -             |
| OAML133    | chr19:33792415  | C   | -   | CEBPA  | c.906delG       | p.K302fs     | frameshift deletion     | 0.122          | 1273  | Yes              | No                    | 0.000         |
| OAML267    | chr19:33792419  | -   | GC  | CEBPA  | c.901_902insGC  | p.D301fs     | frameshift insertion    | 0.022          | 871   | Yes              | No                    | 0.000         |
| OAML021    | chr19:33792420  | C   | T   | CEBPA  | c.G544A         | p.D182*TTT   | nonframeshift insertion | 0.948          | 811   | Yes              | No                    | 0.000         |
| OAML078    | chr19:33792440  | 0   | -   | CEBPA  | c.879_881del    | p.293_294del | nonframeshift deletion  | 0.477          | 757   | Yes              | Yes                   | 0.420         |
| OAML149    | chr19:33792579  | -   | CG  | CEBPA  | c.741_742insCG  | p.G248fs     | frameshift insertion    | 0.433          | 348   | Yes              | No                    | 0.000         |
| OAML214    | chr19:33792709  | C   | -   | CEBPA  | c.255delG       | p.P85fs      | frameshift deletion     | 0.468          | 139   | No               | -                     | -             |
| OAML281    | Chr19:33792709  | C   | -   | CEBPA  | c.612delG       | p.P204fs     | frameshift deletion     | 0.512          | 43    | Yes              | No                    | 0.000         |
| OAML109    | chr19:33792825  | -   | GCG | CEBPA  | c.495_496insCC  | p.E166fs     | frameshift insertion    | 0.046          | 237   | No               | -                     | -             |
| OAML068    | Chr19:33792884  | -   | G   | CEBPA  | c.436dupC       | p.L146fs     | frameshift insertion    | 0.311          | 45    | Yes              | No                    | 0.000         |
| OAML256    | chr19:33792891  | C   | A   | CEBPA  | c.G430T         | p.E144X      | stopgain                | 0.042          | 354   | Yes              | No                    | 0.000         |
| OAML192    | chr19:33793073  | T   | -   | CEBPA  | c.248delA       | p.Q83fs      | frameshift deletion     | 0.436          | 266   | Yes              | No                    | 0.000         |
| OAML162    | chr19:33793075  | G   | -   | CEBPA  | c.204delC       | p.F68fs      | frameshift deletion     | 0.232          | 505   | Yes              | No                    | 0.000         |
| OAML194    | chr19:33793099  | -   | T   | CEBPA  | c.221dupA       | p.N74fs      | frameshift insertion    | 0.135          | 222   | Yes              | No                    | 0.000         |
| OAML194    | chr19:33793146  | C   | A   | CEBPA  | c.G175T         | p.E59X       | stopgain                | 0.075          | 254   | Yes              | No                    | 0.000         |
| OAML188    | chr19:33793185  | -   | A   | CEBPA  | c.135_136insT   | p.P46fs      | frameshift insertion    | 0.050          | 384   | No               | -                     | -             |
| OAML037    | chr19:33793252  | -   | G   | CEBPA  | c.26dupC        | p.P9fs       | frameshift insertion    | 0.175          | 160   | Yes              | No                    | 0.000         |
| OAML183    | chr19:33793252  | -   | G   | CEBPA  | c.68dupC        | p.P23fs      | frameshift insertion    | 0.442          | 317   | No               | -                     | -             |
| OAML101    | chr22:29083949  | C   | -   | CHEK2  | c.1367delG      | p.R450fs     | frameshift deletion     | 0.279          | 830   | Yes              | No                    | 0.000         |
| OAML017    | chr22:29091856  | A   | -   | CHEK2  | c.900delT       | p.T300fs     | frameshift deletion     | 0.459          | 366   | Yes              | No                    | 0.000         |

| subject_id | chrom:pos_start | ref | var  | gene   | cdna           | aa          | Result               | Diagnostic VAF | Depth | Remission Sample | Detected in Remission | Remission VAF |
|------------|-----------------|-----|------|--------|----------------|-------------|----------------------|----------------|-------|------------------|-----------------------|---------------|
| OAML128    | chr16:3779470   | G   | A    | CREBBP | c.C5578T       | p.Q1860X    | stopgain             | 0.033          | 937   | Yes              | No                    | 0.000         |
| OAML314    | Chr1:36932248   | G   | A    | CSF3R  | c.C2302T       | p.Q768X     | stopgain             | 0.200          | 30    | No               | No                    | -             |
| OAML038    | chr7:101758492  | -   | A    | CUX1   | c.599dupA      | p.E200fs    | frameshift insertion | 0.026          | 348   | Yes              | Yes                   | 0.096         |
| OAML223    | chr7:101840440  | A   | -    | CUX1   | c.1782delA     | p.Q594fs    | frameshift deletion  | 0.049          | 761   | No               | -                     | -             |
| OAML181    | chr7:101843371  | C   | T    | CUX1   | c.C2014T       | p.R672X     | stopgain             | 0.022          | 647   | No               | -                     | -             |
| OAML174    | chr7:101877454  | C   | T    | CUX1   | c.C3589T       | p.Q1197X    | stopgain             | 0.465          | 835   | No               | -                     | -             |
| OAML125    | chr7:101918631  | -   | T    | CUX1   | c.1563+1->T    |             | splicing             | 0.503          | 1057  | Yes              | Yes                   | 0.442         |
| OAML008    | chr5:176939370  | C   | T    | DDX41  | c.G1574A       | p.R525H     | nonsynonymous SNV    | 0.022          | 901   | Yes              | No                    | 0.000         |
| OAML019    | Chr5:176939370  | C   | T    | DDX41  | c.G1574A       | p.R525H     | nonsynonymous SNV    | 0.083          | 121   | Yes              | No                    | 0.000         |
| OAML065    | chr5:176939370  | C   | T    | DDX41  | c.G1574A       | p.R525H     | nonsynonymous SNV    | 0.060          | 1089  | Yes              | Yes                   | 0.001         |
| OAML110    | chr5:176939370  | C   | T    | DDX41  | c.G1574A       | p.R525H     | nonsynonymous SNV    | 0.369          | 783   | No               | -                     | -             |
| OAML113    | chr5:176939370  | C   | T    | DDX41  | c.G1574A       | p.R525H     | nonsynonymous SNV    | 0.175          | 1114  | Yes              | No                    | 0.000         |
| OAML147    | chr5:176939370  | C   | T    | DDX41  | c.G1574A       | p.R525H     | nonsynonymous SNV    | 0.123          | 897   | Yes              | No                    | 0.000         |
| OAML157    | chr5:176939370  | C   | T    | DDX41  | c.G1574A       | p.R525H     | nonsynonymous SNV    | 0.109          | 1414  | Yes              | Yes                   | 0.165         |
| OAML181    | chr5:176939370  | C   | T    | DDX41  | c.G1574A       | p.R525H     | nonsynonymous SNV    | 0.181          | 807   | No               | -                     | -             |
| OAML207    | chr5:176939370  | C   | T    | DDX41  | c.G1574A       | p.R525H     | nonsynonymous SNV    | 0.079          | 935   | No               | -                     | -             |
| OAML216    | chr5:176939370  | C   | T    | DDX41  | c.G1574A       | p.R525H     | nonsynonymous SNV    | 0.079          | 953   | No               | -                     | -             |
| OAML223    | chr5:176939370  | C   | T    | DDX41  | c.G1574A       | p.R525H     | nonsynonymous SNV    | 0.079          | 764   | No               | -                     | -             |
| OAML226    | chr5:176939370  | C   | T    | DDX41  | c.G1574A       | p.R525H     | nonsynonymous SNV    | 0.144          | 597   | No               | -                     | -             |
| OAML272    | chr5:176939370  | C   | T    | DDX41  | c.G1574A       | p.R525H     | nonsynonymous SNV    | 0.157          | 925   | Yes              | No                    | 0.000         |
| OAML312    | Chr5:176939370  | C   | T    | DDX41  | c.G1574A       | p.R525H     | nonsynonymous SNV    | 0.072          | 1452  | No               | -                     | -             |
| OAML107    | chr5:176940751  | C   | T    | DDX41  | c.G1033A       | p.E345K     | nonsynonymous SNV    | 0.498          | 819   | No               | -                     | -             |
| OAML041    | chr5:176940752  | G   | C    | DDX41  | c.C1032G       | p.D344E     | nonsynonymous SNV    | 0.095          | 599   | Yes              | No                    | 0.000         |
| OAML008    | chr5:176940836  | 0   | -    | DDX41  | c.947_948del   | p.M310fs    | frameshift deletion  | 0.483          | 706   | Yes              | Yes                   | 0.469         |
| OAML226    | chr5:176940836  | 0   | -    | DDX41  | c.947_948del   | p.M310fs    | frameshift deletion  | 0.525          | 446   | No               | -                     | -             |
| OAML157    | chr5:176940849  | C   | T    | DDX41  |                |             | splicing             | 0.027          | 1095  | Yes              | No                    | 0.000         |
| OAML002    | chr5:176942945  | -   | CATC | DDX41  | c.418_419insGA | p.D140_P14' | stopgain             | 0.457          | 791   | Yes              | Yes                   | 0.383         |
| OAML147    | chr5:176942945  | -   | CATC | DDX41  | c.418_419insGA | p.D140_P14' | stopgain             | 0.421          | 855   | Yes              | Yes                   | 0.364         |
| OAML181    | chr5:176942945  | -   | CATC | DDX41  | c.418_419insGA | p.D140_P14' | stopgain             | 0.441          | 862   | No               | -                     | -             |
| OAML207    | chr5:176942945  | -   | CATC | DDX41  | c.418_419insGA | p.D140_P14' | stopgain             | 0.427          | 858   | No               | -                     | -             |
| OAML216    | chr5:176942945  | -   | CATC | DDX41  | c.418_419insGA | p.D140_P14' | stopgain             | 0.427          | 859   | No               | -                     | -             |
| OAML272    | chr5:176942945  | -   | CATC | DDX41  | c.418_419insGA | p.D140_P14' | stopgain             | 0.448          | 908   | Yes              | Yes                   | 0.350         |
| OAML065    | chr5:176943186  | 0   | -    | DDX41  | c.306_307del   | p.K102fs    | frameshift deletion  | 0.484          | 1085  | Yes              | Yes                   | 0.453         |
| OAML312    | Chr5:176943288  | C   | T    | DDX41  | c.298+1G>A     |             | splicing             | 0.516          | 1297  | No               | -                     | -             |
| OAML019    | Chr5:176943743  | G   | A    | DDX41  | c.C121T        | p.Q41X      | stopgain             | 0.569          | 102   | Yes              | Yes                   | 0.469         |
| OAML041    | chr5:176943944  | C   | T    | DDX41  | c.G3A          | p.M1I       | nonsynonymous SNV    | 0.464          | 457   | Yes              | Yes                   | 0.492         |
| OAML084    | chr5:176943944  | C   | T    | DDX41  | c.G3A          | p.M1I       | nonsynonymous SNV    | 0.516          | 758   | Yes              | Yes                   | 0.459         |
| OAML113    | chr5:176943944  | C   | T    | DDX41  | c.G3A          | p.M1I       | nonsynonymous SNV    | 0.525          | 745   | Yes              | No                    | 0.000         |
| OAML223    | chr5:176943944  | C   | T    | DDX41  | c.G3A          | p.M1I       | nonsynonymous SNV    | 0.486          | 546   | No               | -                     | -             |
| OAML200    | chr2:25457176   | G   | A    | DNMT3A | c.C2711T       | p.P904L     | nonsynonymous SNV    | 0.025          | 482   | Yes              | Yes                   | 0.116         |
| OAML089    | chr2:25457191   | C   | T    | DNMT3A | c.G2696A       | p.R899H     | nonsynonymous SNV    | 0.267          | 862   | Yes              | Yes                   | 0.016         |
| OAML146    | chr2:25457209   | C   | G    | DNMT3A | c.G2678C       | p.W893S     | nonsynonymous SNV    | 0.380          | 1041  | Yes              | Yes                   | 0.049         |
| OAML140    | chr2:25457232   | C   | A    | DNMT3A | c.G2655T       | p.R885S     | nonsynonymous SNV    | 0.444          | 925   | No               | -                     | -             |
| OAML010    | chr2:25457242   | C   | T    | DNMT3A | c.G2645A       | p.R882H     | nonsynonymous SNV    | 0.353          | 730   | Yes              | Yes                   | 0.189         |
| OAML012    | chr2:25457242   | C   | T    | DNMT3A | c.G2645A       | p.R882H     | nonsynonymous SNV    | 0.493          | 760   | Yes              | Yes                   | 0.061         |
| OAML018    | chr2:25457242   | C   | T    | DNMT3A | c.G2645A       | p.R882H     | nonsynonymous SNV    | 0.454          | 1601  | Yes              | Yes                   | 0.096         |
| OAML025    | chr2:25457242   | C   | T    | DNMT3A | c.G2645A       | p.R882H     | nonsynonymous SNV    | 0.471          | 835   | Yes              | Yes                   | 0.392         |
| OAML033    | chr2:25457242   | C   | T    | DNMT3A | c.G2645A       | p.R882H     | nonsynonymous SNV    | 0.420          | 886   | Yes              | Yes                   | 0.382         |
| OAML034    | chr2:25457242   | C   | T    | DNMT3A | c.G2645A       | p.R882H     | nonsynonymous SNV    | 0.311          | 640   | No               | -                     | -             |
| OAML040    | chr2:25457242   | C   | T    | DNMT3A | c.G2645A       | p.R882H     | nonsynonymous SNV    | 0.428          | 767   | Yes              | Yes                   | 0.017         |
| OAML049    | chr2:25457242   | C   | T    | DNMT3A | c.G2645A       | p.R882H     | nonsynonymous SNV    | 0.487          | #N/A  | Yes              | Yes                   | 0.311         |
| OAML128    | chr2:25457242   | C   | T    | DNMT3A | c.G2645A       | p.R882H     | nonsynonymous SNV    | 0.357          | 1000  | Yes              | Yes                   | 0.036         |
| OAML133    | chr2:25457242   | C   | T    | DNMT3A | c.G2645A       | p.R882H     | nonsynonymous SNV    | 0.413          | 1027  | Yes              | Yes                   | 0.008         |
| OAML136    | chr2:25457242   | C   | T    | DNMT3A | c.G2645A       | p.R882H     | nonsynonymous SNV    | 0.439          | 772   | Yes              | Yes                   | 0.441         |
| OAML152    | chr2:25457242   | C   | T    | DNMT3A | c.G2645A       | p.R882H     | nonsynonymous SNV    | 0.340          | 936   | Yes              | Yes                   | 0.161         |
| OAML155    | chr2:25457242   | C   | T    | DNMT3A | c.G2645A       | p.R882H     | nonsynonymous SNV    | 0.456          | 1254  | Yes              | Yes                   | 0.260         |
| OAML185    | chr2:25457242   | C   | T    | DNMT3A | c.G2645A       | p.R882H     | nonsynonymous SNV    | 0.413          | 574   | No               | -                     | -             |
| OAML190    | Chr2:25457242   | C   | T    | DNMT3A | c.G2645A       | p.R882H     | nonsynonymous SNV    | 0.381          | 699   | No               | -                     | -             |
| OAML204    | chr2:25457242   | C   | T    | DNMT3A | c.G2645A       | p.R882H     | nonsynonymous SNV    | 0.270          | 751   | Yes              | Yes                   | 0.223         |
| OAML219    | chr2:25457242   | C   | T    | DNMT3A | c.G2645A       | p.R882H     | nonsynonymous SNV    | 0.376          | 546   | No               | -                     | -             |
| OAML234    | chr2:25457242   | C   | T    | DNMT3A | c.G2645A       | p.R882H     | nonsynonymous SNV    | 0.429          | 860   | Yes              | Yes                   | 0.145         |
| OAML241    | chr2:25457242   | C   | T    | DNMT3A | c.G2645A       | p.R882H     | nonsynonymous SNV    | 0.465          | 748   | Yes              | Yes                   | 0.458         |
| OAML250    | chr2:25457242   | C   | T    | DNMT3A | c.G2645A       | p.R882H     | nonsynonymous SNV    | 0.499          | 691   | Yes              | Yes                   | 0.004         |
| OAML259    | chr2:25457242   | C   | T    | DNMT3A | c.G2645A       | p.R882H     | nonsynonymous SNV    | 0.486          | 698   | Yes              | Yes                   | 0.245         |
| OAML260    | chr2:25457242   | C   | T    | DNMT3A | c.G2645A       | p.R882H     | nonsynonymous SNV    | 0.457          | 792   | Yes              | Yes                   | 0.355         |
| OAML268    | chr2:25457242   | C   | T    | DNMT3A | c.G2645A       | p.R882H     | nonsynonymous SNV    | 0.423          | 714   | Yes              | Yes                   | 0.074         |
| OAML303    | Chr2:25457242   | C   | T    | DNMT3A | c.G2645A       | p.R882H     | nonsynonymous SNV    | 0.314          | 714   | No               | -                     | -             |
| OAML325    | Chr2:25457242   | C   | T    | DNMT3A | c.G2645A       | p.R882H     | nonsynonymous SNV    | 0.380          | 513   | No               | -                     | -             |
| OAML326    | Chr2:25457242   | C   | T    | DNMT3A | c.G2645A       | p.R882H     | nonsynonymous SNV    | 0.432          | 502   | No               | -                     | -             |
| OAML044    | chr2:25457243   | G   | A    | DNMT3A | c.C2644T       | p.R882C     | nonsynonymous SNV    | 0.236          | 652   | Yes              | Yes                   | 0.064         |
| OAML048    | chr2:25457243   | G   | A    | DNMT3A | c.C2644T       | p.R882C     | nonsynonymous SNV    | 0.461          | 686   | Yes              | Yes                   | 0.386         |
| OAML123    | chr2:25457243   | G   | A    | DNMT3A | c.C2644T       | p.R882C     | nonsynonymous SNV    | 0.029          | 867   | Yes              | No                    | 0.000         |
| OAML172    | chr2:25457243   | G   | A    | DNMT3A | c.C2644T       | p.R882C     | nonsynonymous SNV    | 0.445          | 885   | No               | -                     | -             |
| OAML186    | chr2:25457243   | G   | A    | DNMT3A | c.C2644T       | p.R882C     | nonsynonymous SNV    | 0.469          | 444   | No               | -                     | -             |
| OAML301    | Chr2:25457243   | G   | A    | DNMT3A | c.C2644T       | p.R882C     | nonsynonymous SNV    | 0.201          | 672   | No               | -                     | -             |

| subject_id | chrom:pos_start | ref | var | gene   | cdna            | aa           | Result                 | Diagnostic VAF | Depth | Remission Sample | Detected in Remission | Remission VAF |
|------------|-----------------|-----|-----|--------|-----------------|--------------|------------------------|----------------|-------|------------------|-----------------------|---------------|
| OAML316    | Chr2:25457243   | G   | A   | DNMT3A | c.C2644T        | p.R882C      | nonsynonymous SNV      | 0.367          | 949   | Yes              | No                    | 0.000         |
| OAML063    | Chr2:25457252   | T   | C   | DNMT3A | c.A2179G        | p.N727D      | nonsynonymous SNV      | 0.438          | 479   | Yes              | Yes                   | 0.041         |
| OAML153    | chr2:25457252   | T   | C   | DNMT3A | c.A2635G        | p.N879D      | nonsynonymous SNV      | 0.458          | 817   | Yes              | Yes                   | 0.323         |
| OAML250    | chr2:25458661   | T   | C   | DNMT3A | c.A2512G        | p.N838D      | nonsynonymous SNV      | 0.482          | 651   | Yes              | Yes                   | 0.001         |
| OAML087    | chr2:25462005   | 0   | -   | DNMT3A | c.2391_2402del  | p.797_801del | nonframeshift deletion | 0.381          | 916   | Yes              | Yes                   | 0.028         |
| OAML091    | chr2:25462068   | A   | G   | DNMT3A | c.T2339C        | p.I780T      | nonsynonymous SNV      | 0.445          | 758   | Yes              | Yes                   | 0.087         |
| OAML249    | chr2:25463181   | C   | T   | DNMT3A | c.G2312A        | p.R771Q      | nonsynonymous SNV      | 0.460          | 765   | Yes              | Yes                   | 0.417         |
| OAML285    | Chr2:25463195   | 0   | -   | DNMT3A | c.2297_2298del  | p.K766fs     | frameshift deletion    | 0.344          | 288   | Yes              | Yes                   | 0.005         |
| OAML081    | chr2:25463214   | G   | -   | DNMT3A | c.2279delC      | p.A760fs     | frameshift deletion    | 0.455          | 1306  | Yes              | Yes                   | 0.021         |
| OAML095    | chr2:25463247   | C   | T   | DNMT3A | c.G2246A        | p.R749H      | nonsynonymous SNV      | 0.154          | 726   | Yes              | Yes                   | 0.114         |
| OAML094    | chr2:25463286   | C   | T   | DNMT3A | c.G2207A        | p.R736H      | nonsynonymous SNV      | 0.291          | 1129  | Yes              | Yes                   | 0.043         |
| OAML046    | chr2:25463291   | G   | -   | DNMT3A | c.2202delC      | p.F734fs     | frameshift deletion    | 0.387          | 856   | Yes              | Yes                   | 0.412         |
| OAML287    | Chr2:25463295   | T   | C   | DNMT3A | c.A2198G        | p.E733G      | nonsynonymous SNV      | 0.022          | 503   | Yes              | Yes                   | 0.021         |
| OAML221    | chr2:25463296   | C   | G   | DNMT3A | c.G2197C        | p.E733Q      | nonsynonymous SNV      | 0.043          | 561   | No               | .                     | .             |
| OAML059    | chr2:25463297   | 0   | -   | DNMT3A | c.2194_2196del  | p.732_732del | nonframeshift deletion | 0.209          | 985   | Yes              | No                    | 0.000         |
| OAML009    | chr2:25463300   | G   | C   | DNMT3A | c.C2193G        | p.F731L      | nonsynonymous SNV      | 0.432          | 1080  | Yes              | Yes                   | 0.004         |
| OAML058    | chr2:25463301   | A   | C   | DNMT3A | c.T2192G        | p.F731C      | nonsynonymous SNV      | 0.195          | 850   | Yes              | Yes                   | 0.032         |
| OAML236    | chr2:25463307   | C   | -   | DNMT3A | c.2186delG      | p.R729fs     | frameshift deletion    | 0.107          | 754   | Yes              | Yes                   | 0.001         |
| OAML013    | chr2:25463308   | G   | C   | DNMT3A | c.C2185G        | p.R729G      | nonsynonymous SNV      | 0.240          | 25    | Yes              | No                    | 0.000         |
| OAML189    | chr2:25463524   | G   | A   | DNMT3A | c.C2158T        | p.R720C      | nonsynonymous SNV      | 0.812          | 837   | Yes              | No                    | 0.000         |
| OAML130    | chr2:25463541   | G   | C   | DNMT3A | c.C2141G        | p.S714C      | nonsynonymous SNV      | 0.443          | 1365  | Yes              | Yes                   | 0.012         |
| OAML170    | chr2:25463541   | G   | C   | DNMT3A | c.C2141G        | p.S714C      | nonsynonymous SNV      | 0.448          | 659   | No               | .                     | .             |
| OAML313    | Chr2:25463541   | G   | C   | DNMT3A | c.C2141G        | p.S714C      | nonsynonymous SNV      | 0.201          | 885   | No               | .                     | .             |
| OAML193    | chr2:25463583   | G   | T   | DNMT3A | c.C2099A        | p.P700Q      | nonsynonymous SNV      | 0.448          | 565   | Yes              | Yes                   | 0.001         |
| OAML110    | chr2:25463589   | C   | T   | DNMT3A | c.G2093A        | p.W698X      | stopgain               | 0.029          | 715   | No               | .                     | .             |
| OAML235    | chr2:25463589   | C   | T   | DNMT3A | c.G2093A        | p.W698X      | stopgain               | 0.458          | 716   | Yes              | Yes                   | 0.007         |
| OAML073    | Chr2:25464445   | C   | A   | DNMT3A | c.G2068T        | p.V690F      | nonsynonymous SNV      | 0.424          | 294   | Yes              | Yes                   | 0.005         |
| OAML094    | chr2:25466790   | G   | C   | DNMT3A | c.C1913G        | p.S638C      | nonsynonymous SNV      | 0.288          | 972   | Yes              | No                    | 0.000         |
| OAML126    | chr2:25466800   | G   | A   | DNMT3A | c.C1903T        | p.R635W      | nonsynonymous SNV      | 0.027          | 887   | Yes              | Yes                   | 0.059         |
| OAML212    | chr2:25466800   | G   | A   | DNMT3A | c.C1903T        | p.R635W      | nonsynonymous SNV      | 0.350          | 765   | No               | .                     | .             |
| OAML149    | chr2:25466833   | -   | TTA | DNMT3A | c.1869_1870insT | p.P624delins | stopgain               | 0.452          | 829   | Yes              | No                    | 0.000         |
| OAML305    | Chr2:25466852   | C   | T   | DNMT3A | c.1396-1G>A     |              | splicing               | 0.271          | 787   | No               | .                     | .             |
| OAML256    | chr2:25467023   | C   | T   | DNMT3A | c.1395+1G>A     |              | splicing               | 0.031          | 912   | Yes              | Yes                   | 0.015         |
| OAML269    | chr2:25467133   | C   | -   | DNMT3A | c.1742delG      | p.W581X      | stopgain               | 0.079          | 944   | Yes              | Yes                   | 0.091         |
| OAML273    | chr2:25467137   | G   | T   | DNMT3A | c.C1738A        | p.P580T      | nonsynonymous SNV      | 0.454          | 896   | Yes              | Yes                   | 0.008         |
| OAML095    | chr2:25467190   | C   | A   | DNMT3A | c.G1685T        | p.C562F      | nonsynonymous SNV      | 0.152          | 805   | Yes              | Yes                   | 0.126         |
| OAML281    | Chr2:25467207   | C   | G   | DNMT3A | c.G1668C        | p.R556S      | nonsynonymous SNV      | 0.412          | 434   | Yes              | Yes                   | 0.008         |
| OAML193    | chr2:25467468   | G   | C   | DNMT3A | c.C1608G        | p.Y536X      | stopgain               | 0.474          | 604   | Yes              | No                    | 0.000         |
| OAML218    | chr2:25467497   | G   | A   | DNMT3A | c.C1579T        | p.Q527X      | stopgain               | 0.386          | 738   | No               | .                     | .             |
| OAML109    | chr2:25467523   | T   | G   | DNMT3A | c.1099-2A>C     |              | splicing               | 0.333          | 942   | No               | .                     | .             |
| OAML240    | chr2:25468135   | C   | -   | DNMT3A | c.1541delG      | p.C514fs     | frameshift deletion    | 0.404          | 730   | Yes              | Yes                   | 0.236         |
| OAML284    | Chr2:25468892   | C   | A   | DNMT3A | c.G1471T        | p.E491X      | stopgain               | 0.165          | 326   | Yes              | Yes                   | 0.002         |
| OAML223    | chr2:25469525   | G   | A   | DNMT3A | c.C1243T        | p.Q415X      | stopgain               | 0.071          | 574   | No               | .                     | .             |
| OAML225    | chr2:25469630   | C   | G   | DNMT3A | c.G1138C        | p.A380P      | nonsynonymous SNV      | 0.076          | 630   | No               | .                     | .             |
| OAML080    | Chr2:25469974   | C   | -   | DNMT3A | c.1068delG      | p.Q356fs     | frameshift deletion    | 0.387          | 1011  | Yes              | Yes                   | 0.089         |
| OAML056    | chr2:25470464   | G   | T   | DNMT3A | c.C1010A        | p.S337X      | stopgain               | 0.432          | 853   | Yes              | Yes                   | 0.043         |
| OAML140    | chr2:25470494   | C   | T   | DNMT3A | c.G980A         | p.W327X      | stopgain               | 0.462          | 1018  | No               | .                     | .             |
| OAML255    | chr2:25470497   | C   | T   | DNMT3A | c.G977A         | p.R326H      | nonsynonymous SNV      | 0.447          | 1002  | Yes              | No                    | 0.000         |
| OAML282    | Chr2:25470498   | G   | A   | DNMT3A | c.C976T         | p.R326C      | nonsynonymous SNV      | 0.314          | 529   | Yes              | Yes                   | 0.343         |
| OAML130    | chr2:25470516   | G   | A   | DNMT3A | c.C958T         | p.R320X      | stopgain               | 0.423          | 1567  | Yes              | Yes                   | 0.197         |
| OAML016    | chr2:25470557   | C   | T   | DNMT3A | c.G917A         | p.W306X      | stopgain               | 0.328          | 988   | Yes              | No                    | 0.000         |
| OAML293    | Chr2:25470590   | A   | G   | DNMT3A | c.T884C         | p.L295P      | nonsynonymous SNV      | 0.957          | 936   | No               | .                     | .             |
| OAML089    | chr2:25471016   | G   | A   | DNMT3A | c.C745T         | p.Q249X      | stopgain               | 0.238          | 555   | Yes              | No                    | 0.000         |
| OAML007    | chr22:4154974   | T   | -   | EP300  | c.2589delT      | p.V863fs     | frameshift deletion    | 0.427          | 1048  | Yes              | Yes                   | 0.003         |
| OAML256    | chr12:22811995  | A   | G   | ETNK1  | c.A731G         | p.N244S      | nonsynonymous SNV      | 0.024          | 663   | Yes              | Yes                   | 0.016         |
| OAML017    | chr12:22811996  | T   | A   | ETNK1  | c.T732A         | p.N244K      | nonsynonymous SNV      | 0.335          | 511   | Yes              | Yes                   | 0.307         |
| OAML178    | chr12:11992213  | C   | -   | ETV6   | c.303delC       | p.D101fs     | frameshift deletion    | 0.022          | 676   | No               | .                     | .             |
| OAML305    | Chr12:12022360  | -   | GG  | ETV6   | c.466_467insGG  | p.N156fs     | frameshift insertion   | 0.071          | 600   | No               | .                     | .             |
| OAML027    | chr12:12022362  | 0   | -   | ETV6   | c.466_469del    | p.N156fs     | frameshift deletion    | 0.030          | 370   | Yes              | Yes                   | 0.044         |
| OAML178    | chr12:12037406  | A   | G   | ETV6   | c.A1037G        | p.Y346C      | nonsynonymous SNV      | 0.030          | 564   | No               | .                     | .             |
| OAML039    | chr12:12038909  | A   | T   | ETV6   | c.A1202T        | p.Y401F      | nonsynonymous SNV      | 0.034          | 640   | Yes              | No                    | 0.000         |
| OAML157    | chr7:148506443  | C   | T   | EZH2   | c.G2069A        | p.R690H      | nonsynonymous SNV      | 0.021          | 616   | Yes              | No                    | 0.000         |
| OAML057    | chr7:148506477  | C   | T   | EZH2   | c.G2035A        | p.V679M      | nonsynonymous SNV      | 0.774          | 464   | Yes              | No                    | 0.000         |
| OAML121    | chr7:148506477  | C   | T   | EZH2   | c.G2035A        | p.V679M      | nonsynonymous SNV      | 0.472          | 470   | Yes              | Yes                   | 0.092         |
| OAML277    | chr7:148507446  | A   | G   | EZH2   | c.T2008C        | p.F670L      | nonsynonymous SNV      | 0.439          | 528   | Yes              | No                    | 0.000         |
| OAML136    | chr7:148507448  | C   | G   | EZH2   | c.G2006C        | p.S669T      | nonsynonymous SNV      | 0.046          | 525   | Yes              | No                    | 0.000         |
| OAML120    | chr7:148507449  | T   | C   | EZH2   | c.A2005G        | p.S669G      | nonsynonymous SNV      | 0.314          | 522   | Yes              | Yes                   | 0.541         |
| OAML130    | chr7:148507464  | -   | AT  | EZH2   | c.1989_1990insA | p.D664fs     | frameshift insertion   | 0.750          | 344   | Yes              | Yes                   | 0.010         |
| OAML207    | chr7:148512087  | G   | -   | EZH2   | c.1591delC      | p.P531fs     | frameshift deletion    | 0.067          | 450   | No               | .                     | .             |
| OAML077    | Chr7:148512123  | A   | G   | EZH2   | c.T1555C        | p.S519P      | nonsynonymous SNV      | 0.478          | 345   | Yes              | Yes                   | 0.464         |
| OAML113    | chr7:148514992  | 0   | -   | EZH2   | c.1213_1217del  | p.K405fs     | frameshift deletion    | 0.139          | 642   | Yes              | No                    | 0.000         |
| OAML178    | chr7:148523660  | C   | T   | EZH2   | c.892+1G>A      |              | exonic;splicing        | 0.362          | 519   | No               | .                     | .             |
| OAML065    | chr7:148523666  | -   | G   | EZH2   | c.786dupC       | p.N263fs     | frameshift insertion   | 0.041          | 1075  | Yes              | No                    | 0.000         |
| OAML203    | chr7:148525838  | G   | A   | EZH2   | c.C619T         | p.R207X      | stopgain               | 0.455          | 609   | No               | .                     | .             |
| OAML287    | Chr7:148526869  | G   | -   | EZH2   | c.435delC       | p.F145fs     | frameshift deletion    | 0.110          | 118   | Yes              | No                    | 0.000         |

| subject_id | chrom:pos_start | ref | var | gene     | cdna                      | aa           | Result              | Diagnostic VAF | Depth | Remission Sample | Detected in Remission | Remission VAF |
|------------|-----------------|-----|-----|----------|---------------------------|--------------|---------------------|----------------|-------|------------------|-----------------------|---------------|
| OAML134    | chr7:148543649  | C   | -   | EZH2     | c.159delG                 | p.T53fs      | frameshift deletion | 0.198          | 367   | Yes              | Yes                   | 0.028         |
| OAML224    | chr13:28592622  | G   | T   | FLT3     | c.C2523A                  | p.N841K      | nonsynonymous SNV   | 0.231          | 485   | No               | -                     | -             |
| OAML077    | Chr13:28592629  | T   | C   | FLT3     | c.A2516G                  | p.D839G      | nonsynonymous SNV   | 0.117          | 657   | Yes              | No                    | 0.000         |
| OAML281    | Chr13:28592640  | A   | T   | FLT3     | c.T2505A                  | p.D835E      | nonsynonymous SNV   | 0.039          | 279   | Yes              | No                    | 0.000         |
| OAML224    | chr13:28592641  | T   | A   | FLT3     | c.A2504T                  | p.D835V      | nonsynonymous SNV   | 0.044          | 522   | No               | -                     | -             |
| OAML022    | chr13:28592642  | C   | A   | FLT3     | c.G2503T                  | p.D835Y      | nonsynonymous SNV   | 0.108          | 953   | Yes              | Yes                   | 0.002         |
| OAML176    | chr13:28592642  | C   | A   | FLT3     | c.G2503T                  | p.D835Y      | nonsynonymous SNV   | 0.023          | 788   | No               | -                     | -             |
| OAML179    | chr13:28592642  | C   | G   | FLT3     | c.G2503C                  | p.D835H      | nonsynonymous SNV   | 0.095          | 601   | Yes              | No                    | 0.000         |
| OAML185    | chr13:28592642  | C   | A   | FLT3     | c.G2503T                  | p.D835Y      | nonsynonymous SNV   | 0.449          | 506   | No               | -                     | -             |
| OAML225    | chr13:28592642  | C   | A   | FLT3     | c.G2503T                  | p.D835Y      | nonsynonymous SNV   | 0.060          | 550   | No               | -                     | -             |
| OAML236    | chr13:28592642  | C   | T   | FLT3     | c.G2503A                  | p.D835N      | nonsynonymous SNV   | 0.056          | 604   | Yes              | No                    | 0.000         |
| OAML308    | Chr13:28592642  | C   | A   | FLT3     | c.G2503T                  | p.D835Y      | nonsynonymous SNV   | 0.293          | 837   | No               | -                     | -             |
| OAML259    | chr13:28602329  | G   | A   | FLT3     | c.C2039T                  | p.A680V      | nonsynonymous SNV   | 0.437          | 670   | Yes              | No                    | 0.000         |
| OAML056    | chr13:28602340  | G   | T   | FLT3     | c.C2028A                  | p.N676K      | nonsynonymous SNV   | 0.021          | 806   | Yes              | Yes                   | 0.001         |
| OAML057    | chr13:28602340  | G   | C   | FLT3     | c.C2028G                  | p.N676K      | nonsynonymous SNV   | 0.187          | 886   | Yes              | No                    | 0.000         |
| OAML281    | Chr13:28608281  | A   | G   | FLT3     | c.T1775C                  | p.V592A      | nonsynonymous SNV   | 0.063          | 111   | Yes              | No                    | 0.000         |
| OAML180    | chr13:28608285  | A   | C   | FLT3     | c.T1771G                  | p.Y591D      | nonsynonymous SNV   | 0.330          | 318   | No               | -                     | -             |
| OAML080    | Chr13:28608332  | T   | C   | FLT3     | c.A1724G                  | p.Q575R      | nonsynonymous SNV   | 0.289          | 322   | Yes              | No                    | 0.000         |
| OAML176    | chr13:28608341  | T   | C   | FLT3     | c.A1715G                  | p.Y572C      | nonsynonymous SNV   | 0.053          | 359   | No               | -                     | -             |
| OAML006    | chr13           | .   | .   | FLT3_ITD | c.1837+83_1837            | not_exonic   | ITD                 | 0.001          | .     | Yes              | No                    | 0.000         |
| OAML012    | chr13           | .   | .   | FLT3_ITD | c.1804_1805insC           | p.L601_K602  | ITD                 | 0.403          | .     | Yes              | No                    | 0.000         |
| OAML018    | chr13           | .   | .   | FLT3_ITD | c.1814_1815insC           | p.F605_P606  | ITD                 | 0.112          | .     | Yes              | Yes                   | 0.003         |
| OAML018    | chr13           | .   | .   | FLT3_ITD | c.1735_1839dup            | p.579_613du  | ITD                 | 0.155          | .     | Yes              | No                    | 0.000         |
| OAML020    | chr13           | .   | .   | FLT3_ITD | c.1775_1801dup            | p.593_601du  | ITD                 | 0.031          | .     | Yes              | No                    | 0.000         |
| OAML020    | chr13           | .   | .   | FLT3_ITD | c.1743_1793dup            | p.582_598du  | ITD                 | 0.050          | .     | Yes              | No                    | 0.000         |
| OAML022    | chr13           | .   | .   | FLT3_ITD | c.1787_1788insC           | p.E596_Y597  | ITD                 | 0.044          | .     | Yes              | No                    | 0.000         |
| OAML023    | chr13           | .   | .   | FLT3_ITD | c.1837_1837+1in           | p.F612_G611  | ITD                 | 0.219          | .     | Yes              | No                    | 0.000         |
| OAML028    | chr13           | .   | .   | FLT3_ITD | c.1747_1837+2d            | p.582_583ins | ITD                 | 0.337          | .     | Yes              | No                    | 0.000         |
| OAML031    | chr13           | .   | .   | FLT3_ITD | c.1784_1837dup            | p.596_613du  | ITD                 | 0.013          | .     | Yes              | No                    | 0.000         |
| OAML037    | chr13           | .   | .   | FLT3_ITD | c.1770_1793dup            | p.597_598ins | ITD                 | 0.172          | .     | Yes              | No                    | 0.000         |
| OAML048    | chr13           | .   | .   | FLT3_ITD | c.1771_1788dup            | p.591_596du  | ITD                 | 0.012          | .     | Yes              | No                    | 0.000         |
| OAML056    | chr13           | .   | .   | FLT3_ITD | c.1784_1785insA           | p.R595_E596  | ITD                 | 0.042          | .     | Yes              | No                    | 0.000         |
| OAML067    | chr13           | .   | .   | FLT3_ITD | c.1793_1794insC           | p.E598_Y599  | ITD                 | 0.257          | .     | Yes              | No                    | 0.000         |
| OAML073    | chr13           | .   | .   | FLT3_ITD | c.1748_1795dup            | p.598_599ins | ITD                 | 0.124          | .     | Yes              | No                    | 0.000         |
| OAML085    | chr13           | .   | .   | FLT3_ITD | c.1786_1787insC           | p.R595_E596  | ITD                 | 0.140          | .     | Yes              | No                    | 0.000         |
| OAML085    | chr13           | .   | .   | FLT3_ITD | c.1742_1780dup            | p.593_594ins | ITD                 | 0.372          | .     | Yes              | No                    | 0.000         |
| OAML087    | chr13           | .   | .   | FLT3_ITD | c.1756_1837+2d            | p.585_586ins | ITD                 | 0.031          | .     | Yes              | No                    | 0.000         |
| OAML087    | chr13           | .   | .   | FLT3_ITD | c.1749_1838dup            | p.584_613du  | ITD                 | 0.480          | .     | Yes              | No                    | 0.000         |
| OAML091    | chr13           | .   | .   | FLT3_ITD | c.1781_1804dup            | p.601_602ins | ITD                 | 0.187          | .     | Yes              | Yes                   | 0.008         |
| OAML093    | chr13           | .   | .   | FLT3_ITD | c.1777_1800dup            | p.V592_D591  | ITD                 | 0.361          | .     | Yes              | No                    | 0.000         |
| OAML097    | chr13           | .   | .   | FLT3_ITD | c.1772_1837dup            | p.612_613ins | ITD                 | 0.270          | .     | Yes              | No                    | 0.000         |
| OAML115    | chr13           | .   | .   | FLT3_ITD | c.1792_1809dup            | p.598_603du  | ITD                 | 0.453          | .     | No               | -                     | -             |
| OAML124    | chr13           | .   | .   | FLT3_ITD | c.1787_1804dup            | p.597_602du  | ITD                 | 0.045          | .     | Yes              | No                    | 0.000         |
| OAML141    | chr13           | .   | .   | FLT3_ITD | c.1747_1837+2d            | p.582_583ins | ITD                 | 0.032          | .     | No               | -                     | -             |
| OAML141    | chr13           | .   | .   | FLT3_ITD | c.1744_1803dup            | p.582_601du  | ITD                 | 0.174          | .     | No               | -                     | -             |
| OAML141    | chr13           | .   | .   | FLT3_ITD | c.1781_1801dup            | p.595_601du  | ITD                 | 0.426          | .     | No               | -                     | -             |
| OAML141    | chr13           | .   | .   | FLT3_ITD | c.1747_1837+2d            | p.582_583ins | ITD                 | 0.032          | .     | No               | -                     | -             |
| OAML141    | chr13           | .   | .   | FLT3_ITD | c.1744_1803dup            | p.582_601du  | ITD                 | 0.174          | .     | No               | -                     | -             |
| OAML141    | chr13           | .   | .   | FLT3_ITD | c.1781_1801dup            | p.595_601du  | ITD                 | 0.426          | .     | No               | -                     | -             |
| OAML152    | chr13           | .   | .   | FLT3_ITD | c.1834_1835insC           | p.E611_F612  | ITD                 | 0.026          | .     | Yes              | No                    | 0.000         |
| OAML152    | chr13           | .   | .   | FLT3_ITD | c.1787_1788insC           | p.E596_Y597  | ITD                 | 0.067          | .     | Yes              | No                    | 0.000         |
| OAML153    | chr13           | .   | .   | FLT3_ITD | c.1790_1791insC           | p.Y597_E598  | ITD                 | 0.440          | .     | Yes              | No                    | 0.000         |
| OAML159    | chr13           | .   | .   | FLT3_ITD | c.1828_1829insC           | p.N609_L610  | ITD                 | 0.003          | .     | Yes              | No                    | 0.000         |
| OAML159    | chr13           | .   | .   | FLT3_ITD | c.1837+3_1837+ not_exonic | ITD          | 0.010               | .              | Yes   | No               | 0.000                 |               |
| OAML159    | chr13           | .   | .   | FLT3_ITD | c.1787_1788insC           | p.E596_Y597  | ITD                 | 0.010          | .     | Yes              | No                    | 0.000         |
| OAML159    | chr13           | .   | .   | FLT3_ITD | c.1837+88_1837 not_exonic | ITD          | 0.011               | .              | Yes   | No               | 0.000                 |               |
| OAML159    | chr13           | .   | .   | FLT3_ITD | c.1812_1813insC           | p.E604_F605  | ITD                 | 0.109          | .     | Yes              | No                    | 0.000         |
| OAML164    | chr13           | .   | .   | FLT3_ITD | c.1766_1801dup            | p.600_601ins | ITD                 | 0.024          | .     | No               | -                     | -             |
| OAML166    | chr13           | .   | .   | FLT3_ITD | c.1770_1811dup            | p.603_604ins | ITD                 | 0.681          | .     | No               | -                     | -             |
| OAML170    | chr13           | .   | .   | FLT3_ITD | c.1837+4_1837+ not_exonic | ITD          | 0.185               | .              | No    | -                | -                     |               |
| OAML170    | chr13           | .   | .   | FLT3_ITD | c.1801_1802insC           | p.D600_L601  | ITD                 | 0.717          | .     | No               | -                     | -             |
| OAML171    | chr13           | .   | .   | FLT3_ITD | c.1756_1836dup            | p.S585_D586  | ITD                 | 0.388          | .     | No               | -                     | -             |
| OAML172    | chr13           | .   | .   | FLT3_ITD | c.1759_1824dup            | p.587_608du  | ITD                 | 0.372          | .     | No               | -                     | -             |
| OAML177    | chr13           | .   | .   | FLT3_ITD | c.1786_1809dup            | p.596_603du  | ITD                 | 0.009          | .     | No               | -                     | -             |
| OAML177    | chr13           | .   | .   | FLT3_ITD | c.1770_1811dup            | p.603_604ins | ITD                 | 0.292          | .     | No               | -                     | -             |
| OAML183    | chr13           | .   | .   | FLT3_ITD | c.1791_1871dup            | p.598_624du  | ITD                 | 0.177          | .     | No               | -                     | -             |
| OAML184    | chr13           | .   | .   | FLT3_ITD | c.1772_1819dup            | p.606_607ins | ITD                 | 0.270          | .     | No               | -                     | -             |
| OAML187    | chr13           | .   | .   | FLT3_ITD | c.1837_1837+1in           | p.F612_G611  | ITD                 | 0.015          | .     | No               | -                     | -             |
| OAML187    | chr13           | .   | .   | FLT3_ITD | c.1780_1806dup            | p.594_602du  | ITD                 | 0.339          | .     | No               | -                     | -             |
| OAML189    | chr13           | .   | .   | FLT3_ITD | c.1714_1803dup            | p.572_601du  | ITD                 | 0.098          | .     | Yes              | No                    | 0.000         |
| OAML189    | chr13           | .   | .   | FLT3_ITD | c.1776_1790dup            | p.593_597du  | ITD                 | 0.283          | .     | Yes              | No                    | 0.000         |
| OAML191    | chr13           | .   | .   | FLT3_ITD | c.1789_1812dup            | p.597_604du  | ITD                 | 0.436          | .     | No               | -                     | -             |
| OAML193    | chr13           | .   | .   | FLT3_ITD | c.1746_1781dup            | p.583_594du  | ITD                 | 0.321          | .     | Yes              | No                    | 0.000         |
| OAML197    | chr13           | .   | .   | FLT3_ITD | c.1743_1793dup            | p.V581_T582  | ITD                 | 0.028          | .     | No               | -                     | -             |
| OAML202    | chr13           | .   | .   | FLT3_ITD | c.1798_1821dup            | p.600_607du  | ITD                 | 0.019          | .     | No               | -                     | -             |

| subject_id | chrom:pos_start | ref | var  | gene     | cdna            | aa           | Result                  | Diagnostic VAF | Depth | Remission Sample | Detected in Remission | Remission VAF |
|------------|-----------------|-----|------|----------|-----------------|--------------|-------------------------|----------------|-------|------------------|-----------------------|---------------|
| OAML202    | chr13           | .   | .    | FLT3_ITD | c.1837+4_1837+  | not_exonic   | ITD                     | 0.031          | .     | No               | .                     | .             |
| OAML209    | chr13           | .   | .    | FLT3_ITD | c.1778_1825dup  | p.594_609du  | ITD                     | 0.103          | .     | No               | .                     | .             |
| OAML211    | chr13           | .   | .    | FLT3_ITD | c.1747_1785dup  | p.583_595du  | ITD                     | 0.374          | .     | No               | .                     | .             |
| OAML214    | chr13           | .   | .    | FLT3_ITD | c.1745_1789dup  | p.596_597ms  | ITD                     | 0.399          | .     | No               | .                     | .             |
| OAML223    | chr13           | .   | .    | FLT3_ITD | c.1790_1791insC | p.Y597_E598  | ITD                     | 0.003          | .     | No               | .                     | .             |
| OAML224    | chr13           | .   | .    | FLT3_ITD | c.1733_1768dup  | p.589_590ms  | ITD                     | 0.057          | .     | No               | .                     | .             |
| OAML233    | chr13           | .   | .    | FLT3_ITD | c.1797_1798insT | p.Y599_D600  | ITD                     | 0.326          | .     | Yes              | Yes                   | 0.036         |
| OAML233    | chr13           | .   | .    | FLT3_ITD | c.1798_1830dup  | p.600_610du  | ITD                     | 0.017          | .     | Yes              | No                    | 0.000         |
| OAML233    | chr13           | .   | .    | FLT3_ITD | c.1770_1796dup  | p.F590_Y591  | ITD                     | 0.032          | .     | Yes              | No                    | 0.000         |
| OAML233    | chr13           | .   | .    | FLT3_ITD | c.1793_1794insC | p.Y597_E598  | ITD                     | 0.164          | .     | Yes              | No                    | 0.000         |
| OAML234    | chr13           | .   | .    | FLT3_ITD | c.1734_1793dup  | p.579_598du  | ITD                     | 0.025          | .     | Yes              | No                    | 0.000         |
| OAML235    | chr13           | .   | .    | FLT3_ITD | c.1772_1786dup  | p.595_596ms  | ITD                     | 0.384          | .     | Yes              | No                    | 0.000         |
| OAML242    | chr13           | .   | .    | FLT3_ITD | c.1772_1786dup  | p.595_596ms  | ITD                     | 0.006          | .     | Yes              | No                    | 0.000         |
| OAML243    | chr13           | .   | .    | FLT3_ITD | c.1775_1795dup  | p.598_599ms  | ITD                     | 0.005          | .     | Yes              | Yes                   | 0.001         |
| OAML243    | chr13           | .   | .    | FLT3_ITD | c.1791_1835dup  | p.598_612du  | ITD                     | 0.153          | .     | Yes              | Yes                   | 0.014         |
| OAML243    | chr13           | .   | .    | FLT3_ITD | c.1784_1810dup  | p.R595_E598  | ITD                     | 0.331          | .     | Yes              | Yes                   | 0.096         |
| OAML245    | chr13           | .   | .    | FLT3_ITD | c.1820_1821insC | p.R607_E608  | ITD                     | 0.565          | .     | Yes              | No                    | 0.000         |
| OAML255    | chr13           | .   | .    | FLT3_ITD | c.1757_1804dup  | p.601_602ms  | ITD                     | 0.280          | .     | Yes              | Yes                   | 0.000         |
| OAML260    | chr13           | .   | .    | FLT3_ITD | c.1772_1795dup  | p.Y591_V592  | ITD                     | 0.363          | .     | Yes              | No                    | 0.000         |
| OAML261    | chr13           | .   | .    | FLT3_ITD | c.1781_1801dup  | p.595_601du  | ITD                     | 0.340          | .     | Yes              | Yes                   | 0.001         |
| OAML262    | chr13           | .   | .    | FLT3_ITD | c.1800_1801insA | p.D600_L601  | ITD                     | 0.026          | .     | Yes              | No                    | 0.000         |
| OAML262    | chr13           | .   | .    | FLT3_ITD | c.1824_1825insC | p.E608_N601  | ITD                     | 0.496          | .     | Yes              | No                    | 0.000         |
| OAML268    | chr13           | .   | .    | FLT3_ITD | c.1778_1795dup  | p.594_599du  | ITD                     | 0.119          | .     | Yes              | No                    | 0.000         |
| OAML270    | chr13           | .   | .    | FLT3_ITD | c.1810_1811insT | p.W603_E604  | ITD                     | 0.382          | .     | Yes              | Yes                   | 0.153         |
| OAML270    | chr13           | .   | .    | FLT3_ITD | c.1774_1794dup  | p.Y591_V592  | ITD                     | 0.068          | .     | Yes              | No                    | 0.000         |
| OAML273    | chr13           | .   | .    | FLT3_ITD | c.1776_1790dup  | p.593_597du  | ITD                     | 0.075          | .     | Yes              | No                    | 0.000         |
| OAML273    | chr13           | .   | .    | FLT3_ITD | c.1756_1794dup  | p.S585_D588  | ITD                     | 0.501          | .     | Yes              | No                    | 0.000         |
| OAML276    | chr13           | .   | .    | FLT3_ITD | c.1795_1837+2d  | p.598_599ms  | ITD                     | 0.453          | .     | Yes              | Yes                   | 0.004         |
| OAML278    | chr13           | .   | .    | FLT3_ITD | c.1837+2_1837+  | not_exonic   | ITD                     | 0.488          | .     | Yes              | Yes                   | 0.001         |
| OAML281    | chr13           | .   | .    | FLT3_ITD | c.1800_1801insT | p.D600_L601  | ITD                     | 0.121          | .     | Yes              | No                    | 0.000         |
| OAML308    | chr13           | .   | .    | FLT3_ITD | c.1750_1800dup  | p.584_600du  | ITD                     | 0.018          | .     | No               | .                     | .             |
| OAML308    | chr13           | .   | .    | FLT3_ITD | c.1770_1793dup  | p.597_598ms  | ITD                     | 0.124          | .     | No               | .                     | .             |
| OAML321    | chr13           | .   | .    | FLT3_ITD | c.1776_1799dup  | p.593_600du  | ITD                     | 0.011          | .     | No               | .                     | .             |
| OAML321    | chr13           | .   | .    | FLT3_ITD | c.1756_1797dup  | p.586_599du  | ITD                     | 0.021          | .     | No               | .                     | .             |
| OAML326    | chr13           | .   | .    | FLT3_ITD | c.1815_1816insC | p.F605_P606  | ITD                     | 0.354          | .     | No               | .                     | .             |
| OAML267    | chr3:128200139  | 0   | -    | GATA2    | c.1161_1166del  | p.387_389de  | nonframeshift deletion  | 0.405          | 759   | Yes              | No                    | 0.000         |
| OAML173    | chr3:128200699  | -   | CAGG | GATA2    | c.1105_1106insC | p.V399delins | nonframeshift insertion | 0.327          | 530   | No               | .                     | .             |
| OAML309    | chr3:128200729  | A   | G    | GATA2    | c.T1078C        | p.L359S      | nonsynonymous SNV       | 0.309          | 846   | No               | .                     | .             |
| OAML192    | chr3:128200744  | G   | A    | GATA2    | c.C1061T        | p.T354M      | nonsynonymous SNV       | 0.444          | 579   | Yes              | No                    | 0.000         |
| OAML078    | chr3:128202731  | C   | T    | GATA2    | c.G989A         | p.R330Q      | nonsynonymous SNV       | 0.027          | 954   | Yes              | No                    | 0.000         |
| OAML267    | chr3:128202731  | C   | A    | GATA2    | c.G989T         | p.R330L      | nonsynonymous SNV       | 0.461          | 1040  | Yes              | No                    | 0.000         |
| OAML021    | chr3:128202758  | A   | G    | GATA2    | c.T962C         | p.L321P      | nonsynonymous SNV       | 0.427          | 1147  | Yes              | No                    | 0.000         |
| OAML183    | chr3:128202761  | C   | T    | GATA2    | c.G959A         | p.G320D      | nonsynonymous SNV       | 0.205          | 819   | No               | .                     | .             |
| OAML201    | chr3:128202762  | C   | G    | GATA2    | c.G958C         | p.G320R      | nonsynonymous SNV       | 0.146          | 1087  | No               | .                     | .             |
| OAML162    | chr3:128202767  | G   | A    | GATA2    | c.C953T         | p.A318V      | nonsynonymous SNV       | 0.234          | 1112  | Yes              | No                    | 0.000         |
| OAML180    | chr3:128202813  | -   | CCC  | GATA2    | c.906_907insGG  | p.T303delins | nonframeshift insertion | 0.101          | 698   | No               | .                     | .             |
| OAML192    | chr3:128202829  | G   | T    | GATA2    | c.C891A         | p.N297K      | nonsynonymous SNV       | 0.050          | 766   | Yes              | No                    | 0.000         |
| OAML274    | chr3:128204604  | 0   | -    | GATA2    | c.833_837del    | p.F278fs     | frameshift deletion     | 0.318          | 701   | Yes              | Yes                   | 0.140         |
| OAML198    | chr3:128204841  | -   | C    | GATA2    | c.599dupG       | p.G200fs     | frameshift insertion    | 0.041          | 507   | Yes              | Yes                   | 0.045         |
| OAML073    | Chr3:128205212  | C   | A    | GATA2    | c.230-1G>T      |              | splicing                | 0.022          | 222   | Yes              | No                    | 0.000         |
| OAML216    | chr1:1747229    | T   | C    | GNB1     | c.A169G         | p.K57E       | nonsynonymous SNV       | 0.052          | 749   | No               | .                     | .             |
| OAML277    | chr1:1747229    | T   | C    | GNB1     | c.A169G         | p.K57E       | nonsynonymous SNV       | 0.418          | 878   | Yes              | Yes                   | 0.022         |
| OAML010    | chr2:209113112  | C   | T    | IDH1     | c.G395A         | p.R132H      | nonsynonymous SNV       | 0.315          | 520   | Yes              | Yes                   | 0.001         |
| OAML012    | chr2:209113112  | C   | T    | IDH1     | c.G395A         | p.R132H      | nonsynonymous SNV       | 0.439          | 515   | Yes              | No                    | 0.000         |
| OAML016    | chr2:209113112  | C   | T    | IDH1     | c.G395A         | p.R132H      | nonsynonymous SNV       | 0.317          | 555   | Yes              | No                    | 0.000         |
| OAML077    | Chr2:209113112  | C   | T    | IDH1     | c.G395A         | p.R132H      | nonsynonymous SNV       | 0.489          | 581   | Yes              | Yes                   | 0.001         |
| OAML080    | Chr2:209113112  | C   | T    | IDH1     | c.G395A         | p.R132H      | nonsynonymous SNV       | 0.074          | 582   | Yes              | No                    | 0.000         |
| OAML130    | chr2:209113112  | C   | T    | IDH1     | c.G395A         | p.R132H      | nonsynonymous SNV       | 0.443          | 880   | Yes              | Yes                   | 0.007         |
| OAML214    | chr2:209113112  | C   | T    | IDH1     | c.G395A         | p.R132H      | nonsynonymous SNV       | 0.410          | 613   | No               | .                     | .             |
| OAML221    | chr2:209113112  | C   | T    | IDH1     | c.G395A         | p.R132H      | nonsynonymous SNV       | 0.195          | 339   | No               | .                     | .             |
| OAML252    | chr2:209113112  | C   | T    | IDH1     | c.G395A         | p.R132H      | nonsynonymous SNV       | 0.442          | 556   | Yes              | No                    | 0.000         |
| OAML020    | chr2:209113113  | G   | C    | IDH1     | c.C394G         | p.R132G      | nonsynonymous SNV       | 0.405          | 582   | Yes              | Yes                   | 0.001         |
| OAML027    | chr2:209113113  | G   | A    | IDH1     | c.C394T         | p.R132C      | nonsynonymous SNV       | 0.059          | 387   | Yes              | Yes                   | 0.011         |
| OAML030    | Chr2:209113113  | G   | A    | IDH1     | c.C394T         | p.R132C      | nonsynonymous SNV       | 0.346          | 327   | No               | .                     | .             |
| OAML033    | chr2:209113113  | G   | A    | IDH1     | c.C394T         | p.R132C      | nonsynonymous SNV       | 0.456          | 680   | Yes              | Yes                   | 0.350         |
| OAML040    | chr2:209113113  | G   | A    | IDH1     | c.C394T         | p.R132C      | nonsynonymous SNV       | 0.414          | 536   | Yes              | Yes                   | 0.003         |
| OAML051    | chr2:209113113  | G   | A    | IDH1     | c.C394T         | p.R132C      | nonsynonymous SNV       | 0.383          | 723   | Yes              | No                    | 0.000         |
| OAML064    | chr2:209113113  | G   | A    | IDH1     | c.C394T         | p.R132C      | nonsynonymous SNV       | 0.192          | 617   | Yes              | Yes                   | 0.003         |
| OAML088    | chr2:209113113  | G   | A    | IDH1     | c.C394T         | p.R132C      | nonsynonymous SNV       | 0.105          | 523   | Yes              | No                    | 0.000         |
| OAML089    | chr2:209113113  | G   | A    | IDH1     | c.C394T         | p.R132C      | nonsynonymous SNV       | 0.229          | 446   | Yes              | No                    | 0.000         |
| OAML095    | chr2:209113113  | G   | A    | IDH1     | c.C394T         | p.R132C      | nonsynonymous SNV       | 0.036          | 494   | Yes              | No                    | 0.000         |
| OAML109    | chr2:209113113  | G   | A    | IDH1     | c.C394T         | p.R132C      | nonsynonymous SNV       | 0.317          | 675   | No               | .                     | .             |
| OAML136    | chr2:209113113  | G   | C    | IDH1     | c.C394G         | p.R132G      | nonsynonymous SNV       | 0.457          | 593   | Yes              | Yes                   | 0.349         |
| OAML142    | chr2:209113113  | G   | A    | IDH1     | c.C394T         | p.R132C      | nonsynonymous SNV       | 0.371          | 498   | No               | .                     | .             |
| OAML146    | chr2:209113113  | G   | A    | IDH1     | c.C394T         | p.R132C      | nonsynonymous SNV       | 0.372          | 568   | Yes              | Yes                   | 0.002         |

| subject_id | chrom:pos_start | ref | var | gene  | cdna           | aa           | Result                 | Diagnostic VAF | Depth | Remission Sample | Detected in Remission | Remission VAF |
|------------|-----------------|-----|-----|-------|----------------|--------------|------------------------|----------------|-------|------------------|-----------------------|---------------|
| OAML155    | chr2:209113113  | G   | A   | IDH1  | c.C394T        | p.R132C      | nonsynonymous SNV      | 0.450          | 716   | Yes              | No                    | 0.000         |
| OAML156    | chr2:209113113  | G   | A   | IDH1  | c.C394T        | p.R132C      | nonsynonymous SNV      | 0.344          | 361   | Yes              | No                    | 0.000         |
| OAML175    | chr2:209113113  | G   | T   | IDH1  | c.C394A        | p.R132S      | nonsynonymous SNV      | 0.312          | 426   | No               | .                     | .             |
| OAML186    | chr2:209113113  | G   | C   | IDH1  | c.C394G        | p.R132G      | nonsynonymous SNV      | 0.449          | 304   | No               | .                     | .             |
| OAML201    | chr2:209113113  | G   | A   | IDH1  | c.C394T        | p.R132C      | nonsynonymous SNV      | 0.467          | 610   | No               | .                     | .             |
| OAML210    | chr2:209113113  | G   | T   | IDH1  | c.C394A        | p.R132S      | nonsynonymous SNV      | 0.233          | 430   | No               | .                     | .             |
| OAML218    | chr2:209113113  | G   | A   | IDH1  | c.C394T        | p.R132C      | nonsynonymous SNV      | 0.384          | 438   | No               | .                     | .             |
| OAML250    | chr2:209113113  | G   | A   | IDH1  | c.C394T        | p.R132C      | nonsynonymous SNV      | 0.413          | 472   | Yes              | No                    | 0.000         |
| OAML256    | chr2:209113113  | G   | A   | IDH1  | c.C394T        | p.R132C      | nonsynonymous SNV      | 0.388          | 533   | Yes              | Yes                   | 0.017         |
| OAML266    | chr2:209113113  | G   | A   | IDH1  | c.C394T        | p.R132C      | nonsynonymous SNV      | 0.410          | 520   | Yes              | Yes                   | 0.001         |
| OAML303    | Chr2:209113113  | G   | A   | IDH1  | c.C394T        | p.R132C      | nonsynonymous SNV      | 0.313          | 683   | No               | .                     | .             |
| OAML305    | Chr2:209113113  | G   | A   | IDH1  | c.C394T        | p.R132C      | nonsynonymous SNV      | 0.282          | 642   | No               | .                     | .             |
| OAML316    | Chr2:209113113  | G   | A   | IDH1  | c.C394T        | p.R132C      | nonsynonymous SNV      | 0.295          | 898   | Yes              | No                    | 0.000         |
| OAML327    | Chr2:209113113  | G   | A   | IDH1  | c.C394T        | p.R132C      | nonsynonymous SNV      | 0.339          | 386   | No               | .                     | .             |
| OAML139    | chr15:90631837  | C   | A   | IDH2  | c.G516T        | p.R172S      | nonsynonymous SNV      | 0.328          | 913   | Yes              | No                    | 0.000         |
| OAML049    | chr15:90631838  | C   | T   | IDH2  | c.G515A        | p.R172K      | nonsynonymous SNV      | 0.440          | 591   | Yes              | No                    | 0.000         |
| OAML053    | chr15:90631838  | C   | T   | IDH2  | c.G515A        | p.R172K      | nonsynonymous SNV      | 0.452          | 923   | Yes              | No                    | 0.000         |
| OAML060    | chr15:90631838  | C   | T   | IDH2  | c.G515A        | p.R172K      | nonsynonymous SNV      | 0.052          | 1048  | Yes              | No                    | 0.000         |
| OAML063    | Chr15:90631838  | C   | T   | IDH2  | c.G359A        | p.R120K      | nonsynonymous SNV      | 0.452          | 334   | Yes              | No                    | 0.000         |
| OAML094    | chr15:90631838  | C   | T   | IDH2  | c.G515A        | p.R172K      | nonsynonymous SNV      | 0.325          | 1355  | Yes              | No                    | 0.000         |
| OAML128    | chr15:90631838  | C   | T   | IDH2  | c.G515A        | p.R172K      | nonsynonymous SNV      | 0.394          | 1115  | Yes              | No                    | 0.000         |
| OAML140    | chr15:90631838  | C   | T   | IDH2  | c.G515A        | p.R172K      | nonsynonymous SNV      | 0.626          | 999   | No               | .                     | .             |
| OAML149    | chr15:90631838  | C   | T   | IDH2  | c.G515A        | p.R172K      | nonsynonymous SNV      | 0.483          | 1040  | Yes              | No                    | 0.000         |
| OAML178    | chr15:90631838  | C   | T   | IDH2  | c.G515A        | p.R172K      | nonsynonymous SNV      | 0.297          | 740   | No               | .                     | .             |
| OAML199    | chr15:90631838  | C   | T   | IDH2  | c.G515A        | p.R172K      | nonsynonymous SNV      | 0.147          | 482   | Yes              | No                    | 0.000         |
| OAML204    | chr15:90631838  | C   | T   | IDH2  | c.G515A        | p.R172K      | nonsynonymous SNV      | 0.114          | 862   | Yes              | Yes                   | 0.186         |
| OAML236    | chr15:90631838  | C   | T   | IDH2  | c.G515A        | p.R172K      | nonsynonymous SNV      | 0.100          | 821   | Yes              | Yes                   | 0.003         |
| OAML240    | chr15:90631838  | C   | T   | IDH2  | c.G515A        | p.R172K      | nonsynonymous SNV      | 0.423          | 1009  | Yes              | No                    | 0.000         |
| OAML247    | chr15:90631838  | C   | T   | IDH2  | c.G515A        | p.R172K      | nonsynonymous SNV      | 0.296          | 899   | Yes              | No                    | 0.000         |
| OAML269    | chr15:90631838  | C   | T   | IDH2  | c.G515A        | p.R172K      | nonsynonymous SNV      | 0.051          | 906   | Yes              | Yes                   | 0.105         |
| OAML284    | Chr15:90631838  | C   | T   | IDH2  | c.G515A        | p.R172K      | nonsynonymous SNV      | 0.127          | 574   | Yes              | No                    | 0.000         |
| OAML293    | Chr15:90631838  | C   | T   | IDH2  | c.G515A        | p.R172K      | nonsynonymous SNV      | 0.466          | 874   | No               | .                     | .             |
| OAML301    | Chr15:90631838  | C   | T   | IDH2  | c.G515A        | p.R172K      | nonsynonymous SNV      | 0.170          | 970   | No               | .                     | .             |
| OAML313    | Chr15:90631838  | C   | T   | IDH2  | c.G515A        | p.R172K      | nonsynonymous SNV      | 0.175          | 950   | No               | .                     | .             |
| OAML322    | Chr15:90631838  | C   | T   | IDH2  | c.G515A        | p.R172K      | nonsynonymous SNV      | 0.247          | 1132  | No               | .                     | .             |
| OAML006    | chr15:90631934  | C   | T   | IDH2  | c.G419A        | p.R140Q      | nonsynonymous SNV      | 0.151          | 819   | Yes              | No                    | 0.000         |
| OAML035    | chr15:90631934  | C   | T   | IDH2  | c.G419A        | p.R140Q      | nonsynonymous SNV      | 0.327          | 728   | Yes              | Yes                   | 0.003         |
| OAML056    | chr15:90631934  | C   | T   | IDH2  | c.G419A        | p.R140Q      | nonsynonymous SNV      | 0.457          | 972   | Yes              | No                    | 0.000         |
| OAML068    | Chr15:90631934  | C   | T   | IDH2  | c.G419A        | p.R140Q      | nonsynonymous SNV      | 0.459          | 289   | Yes              | Yes                   | 0.390         |
| OAML087    | chr15:90631934  | C   | T   | IDH2  | c.G419A        | p.R140Q      | nonsynonymous SNV      | 0.461          | 1190  | Yes              | Yes                   | 0.168         |
| OAML091    | chr15:90631934  | C   | T   | IDH2  | c.G419A        | p.R140Q      | nonsynonymous SNV      | 0.405          | 951   | Yes              | Yes                   | 0.044         |
| OAML102    | chr15:90631934  | C   | T   | IDH2  | c.G419A        | p.R140Q      | nonsynonymous SNV      | 0.458          | 1038  | No               | .                     | .             |
| OAML106    | chr15:90631934  | C   | T   | IDH2  | c.G419A        | p.R140Q      | nonsynonymous SNV      | 0.085          | 963   | Yes              | No                    | 0.000         |
| OAML107    | chr15:90631934  | C   | T   | IDH2  | c.G419A        | p.R140Q      | nonsynonymous SNV      | 0.039          | 830   | No               | .                     | .             |
| OAML124    | chr15:90631934  | C   | T   | IDH2  | c.G419A        | p.R140Q      | nonsynonymous SNV      | 0.430          | 1017  | Yes              | No                    | 0.000         |
| OAML133    | chr15:90631934  | C   | T   | IDH2  | c.G419A        | p.R140Q      | nonsynonymous SNV      | 0.427          | 1154  | Yes              | Yes                   | 0.005         |
| OAML143    | chr15:90631934  | C   | T   | IDH2  | c.G419A        | p.R140Q      | nonsynonymous SNV      | 0.481          | 867   | No               | .                     | .             |
| OAML145    | chr15:90631934  | C   | T   | IDH2  | c.G419A        | p.R140Q      | nonsynonymous SNV      | 0.242          | 1009  | Yes              | Yes                   | 0.019         |
| OAML169    | chr15:90631934  | C   | T   | IDH2  | c.G419A        | p.R140Q      | nonsynonymous SNV      | 0.452          | 602   | No               | .                     | .             |
| OAML180    | chr15:90631934  | C   | T   | IDH2  | c.G419A        | p.R140Q      | nonsynonymous SNV      | 0.461          | 692   | No               | .                     | .             |
| OAML184    | chr15:90631934  | C   | T   | IDH2  | c.G419A        | p.R140Q      | nonsynonymous SNV      | 0.453          | 669   | No               | .                     | .             |
| OAML188    | chr15:90631934  | C   | T   | IDH2  | c.G419A        | p.R140Q      | nonsynonymous SNV      | 0.406          | 869   | No               | .                     | .             |
| OAML190    | Chr15:90631934  | C   | T   | IDH2  | c.G419A        | p.R140Q      | nonsynonymous SNV      | 0.353          | 754   | No               | .                     | .             |
| OAML195    | chr15:90631934  | C   | T   | IDH2  | c.G419A        | p.R140Q      | nonsynonymous SNV      | 0.503          | 561   | Yes              | Yes                   | 0.262         |
| OAML202    | chr15:90631934  | C   | T   | IDH2  | c.G419A        | p.R140Q      | nonsynonymous SNV      | 0.405          | 252   | No               | .                     | .             |
| OAML209    | chr15:90631934  | C   | T   | IDH2  | c.G419A        | p.R140Q      | nonsynonymous SNV      | 0.438          | 954   | No               | .                     | .             |
| OAML230    | chr15:90631934  | C   | T   | IDH2  | c.G419A        | p.R140Q      | nonsynonymous SNV      | 0.373          | 785   | Yes              | No                    | 0.000         |
| OAML241    | chr15:90631934  | C   | T   | IDH2  | c.G419A        | p.R140Q      | nonsynonymous SNV      | 0.391          | 895   | Yes              | Yes                   | 0.001         |
| OAML308    | Chr15:90631934  | C   | T   | IDH2  | c.G419A        | p.R140Q      | nonsynonymous SNV      | 0.186          | 981   | No               | .                     | .             |
| OAML321    | Chr15:90631934  | C   | T   | IDH2  | c.G419A        | p.R140Q      | nonsynonymous SNV      | 0.462          | 940   | No               | .                     | .             |
| OAML325    | Chr15:90631934  | C   | T   | IDH2  | c.G419A        | p.R140Q      | nonsynonymous SNV      | 0.488          | 685   | No               | .                     | .             |
| OAML231    | chr15:90631935  | G   | A   | IDH2  | c.C418T        | p.R140W      | nonsynonymous SNV      | 0.462          | 937   | Yes              | Yes                   | 0.003         |
| OAML192    | chr7:50367281   | -   | CG  | IKZF1 | c.88_89insCG   | p.P30fs      | frameshift insertion   | 0.046          | 541   | Yes              | No                    | 0.000         |
| OAML015    | chr7:50444401   | C   | T   | IKZF1 | c.C331T        | p.R111X      | stopgain               | 0.084          | 622   | Yes              | No                    | 0.000         |
| OAML316    | Chr7:50450274   | -   | T   | IKZF1 | c.197_198insT  | p.S66fs      | frameshift insertion   | 0.023          | 736   | Yes              | No                    | 0.000         |
| OAML106    | chr7:50459492   | T   | -   | IKZF1 | c.394delT      | p.S132fs     | frameshift deletion    | 0.051          | 472   | Yes              | No                    | 0.000         |
| OAML138    | chr9:5070035    | 0   | -   | JAK2  | c.1624_1629del | p.542_543del | nonframeshift deletion | 0.076          | 503   | Yes              | No                    | 0.000         |
| OAML030    | Chr9:5073770    | G   | T   | JAK2  | c.G1849T       | p.V617F      | nonsynonymous SNV      | 0.288          | 132   | No               | .                     | .             |
| OAML074    | chr9:5073770    | G   | T   | JAK2  | c.G1849T       | p.V617F      | nonsynonymous SNV      | 0.105          | 545   | No               | .                     | .             |
| OAML136    | chr9:5073770    | G   | T   | JAK2  | c.G1849T       | p.V617F      | nonsynonymous SNV      | 0.947          | 527   | Yes              | Yes                   | 0.496         |
| OAML143    | chr9:5073770    | G   | T   | JAK2  | c.G1849T       | p.V617F      | nonsynonymous SNV      | 0.025          | 511   | No               | .                     | .             |
| OAML239    | chr9:5073770    | G   | T   | JAK2  | c.G1849T       | p.V617F      | nonsynonymous SNV      | 0.534          | 354   | Yes              | No                    | 0.000         |
| OAML241    | chr9:5073770    | G   | T   | JAK2  | c.G1849T       | p.V617F      | nonsynonymous SNV      | 0.032          | 594   | Yes              | Yes                   | 0.430         |
| OAML251    | chr9:5073770    | G   | T   | JAK2  | c.G1849T       | p.V617F      | nonsynonymous SNV      | 0.399          | 544   | Yes              | Yes                   | 0.009         |
| OAML254    | chr9:5073770    | G   | T   | JAK2  | c.G1849T       | p.V617F      | nonsynonymous SNV      | 0.405          | 618   | Yes              | Yes                   | 0.323         |

| subject_id | chrom:pos_start | ref | var | gene  | cdna            | aa            | Result               | Diagnostic VAF | Depth | Remission Sample | Detected in Remission | Remission VAF |
|------------|-----------------|-----|-----|-------|-----------------|---------------|----------------------|----------------|-------|------------------|-----------------------|---------------|
| OAML272    | chr9:5073770    | G   | T   | JAK2  | c.G1849T        | p.V617F       | nonsynonymous SNV    | 0.115          | 479   | Yes              | No                    | 0.000         |
| OAML327    | Chr9:5073770    | G   | T   | JAK2  | c.G1849T        | p.V617F       | nonsynonymous SNV    | 0.577          | 201   | No               | -                     | -             |
| OAML251    | chr9:5078360    | A   | G   | JAK2  | c.A2047G        | p.R683G       | nonsynonymous SNV    | 0.392          | 526   | Yes              | No                    | 0.000         |
| OAML328    | Chr12:122018732 | 0   | -   | KDM2B | c.84_85del      | p.T28fs       | frameshift deletion  | 0.460          | 284   | No               | -                     | -             |
| OAML073    | Chr12:394759    | C   | A   | KDM5A | c.G4938T        | p.E1646X      | stopgain             | 0.022          | 228   | Yes              | No                    | 0.000         |
| OAML073    | Chr12:404813    | C   | A   | KDM5A | c.G4381T        | p.E1461X      | stopgain             | 0.021          | 333   | Yes              | No                    | 0.000         |
| OAML044    | chrX:44922973   | C   | T   | KDM6A | c.C1699T        | p.R567X       | stopgain             | 0.056          | 588   | Yes              | No                    | 0.000         |
| OAML190    | ChrX:44935941   | G   | C   | KDM6A | c.2466-1G>C     |               | splicing             | 0.132          | 167   | No               | -                     | -             |
| OAML087    | chrX:44942731   | -   | TA  | KDM6A | c.3176_3177insT | p.T1059fs     | frameshift insertion | 0.064          | 817   | Yes              | No                    | 0.000         |
| OAML020    | chrX:44949176   | G   | A   | KDM6A | c.3499+1G>A     |               | splicing             | 0.072          | 334   | Yes              | No                    | 0.000         |
| OAML222    | chrX:44966736   | -   | GGG | KDM6A | c.3825_3826insC | p.H1275fs     | frameshift insertion | 0.516          | 278   | No               | -                     | -             |
| OAML222    | chr4:55599340   | T   | A   | KIT   | c.T2466A        | p.N822K       | nonsynonymous SNV    | 0.351          | 662   | No               | -                     | -             |
| OAML005    | chr12:25378561  | G   | A   | KRAS  | c.C437T         | p.A146V       | nonsynonymous SNV    | 0.043          | 588   | Yes              | No                    | 0.000         |
| OAML229    | chr12:25378562  | C   | T   | KRAS  | c.G436A         | p.A146T       | nonsynonymous SNV    | 0.314          | 486   | Yes              | Yes                   | 0.001         |
| OAML116    | chr12:25378648  | T   | C   | KRAS  | c.A350G         | p.K117R       | nonsynonymous SNV    | 0.531          | 842   | Yes              | Yes                   | 0.069         |
| OAML281    | Chr12:25380282  | G   | C   | KRAS  | c.C176G         | p.A59G        | nonsynonymous SNV    | 0.115          | 270   | Yes              | No                    | 0.000         |
| OAML229    | chr12:25380285  | G   | A   | KRAS  | c.C173T         | p.T58I        | nonsynonymous SNV    | 0.089          | 673   | Yes              | No                    | 0.000         |
| OAML005    | chr12:25398281  | C   | T   | KRAS  | c.G38A          | p.G13D        | nonsynonymous SNV    | 0.034          | 645   | Yes              | No                    | 0.000         |
| OAML036    | chr12:25398281  | C   | T   | KRAS  | c.G38A          | p.G13D        | nonsynonymous SNV    | 0.038          | 731   | Yes              | No                    | 0.000         |
| OAML179    | chr12:25398281  | C   | T   | KRAS  | c.G38A          | p.G13D        | nonsynonymous SNV    | 0.093          | 486   | Yes              | No                    | 0.000         |
| OAML215    | chr12:25398281  | C   | T   | KRAS  | c.G38A          | p.G13D        | nonsynonymous SNV    | 0.304          | 648   | No               | -                     | -             |
| OAML234    | chr12:25398281  | C   | T   | KRAS  | c.G38A          | p.G13D        | nonsynonymous SNV    | 0.056          | 656   | Yes              | No                    | 0.000         |
| OAML267    | chr12:25398282  | C   | A   | KRAS  | c.G37T          | p.G13C        | nonsynonymous SNV    | 0.039          | 668   | Yes              | No                    | 0.000         |
| OAML005    | chr12:25398284  | C   | A   | KRAS  | c.G35T          | p.G12V        | nonsynonymous SNV    | 0.028          | 635   | Yes              | No                    | 0.000         |
| OAML066    | chr12:25398284  | C   | T   | KRAS  | c.G35A          | p.G12D        | nonsynonymous SNV    | 0.038          | 871   | Yes              | No                    | 0.000         |
| OAML108    | chr12:25398284  | C   | T   | KRAS  | c.G35A          | p.G12D        | nonsynonymous SNV    | 0.024          | 783   | No               | -                     | -             |
| OAML117    | chr12:25398284  | C   | T   | KRAS  | c.G35A          | p.G12D        | nonsynonymous SNV    | 0.359          | 785   | Yes              | Yes                   | 0.001         |
| OAML197    | chr12:25398284  | C   | G   | KRAS  | c.G35C          | p.G12A        | nonsynonymous SNV    | 0.116          | 778   | No               | -                     | -             |
| OAML234    | chr12:25398284  | C   | G   | KRAS  | c.G35C          | p.G12A        | nonsynonymous SNV    | 0.054          | 653   | Yes              | No                    | 0.000         |
| OAML242    | chr12:25398284  | C   | A   | KRAS  | c.G35T          | p.G12V        | nonsynonymous SNV    | 0.353          | 627   | Yes              | No                    | 0.000         |
| OAML246    | chr12:25398284  | C   | T   | KRAS  | c.G35A          | p.G12D        | nonsynonymous SNV    | 0.178          | 667   | Yes              | No                    | 0.000         |
| OAML280    | chr12:25398284  | C   | A   | KRAS  | c.G35T          | p.G12V        | nonsynonymous SNV    | 0.048          | 670   | Yes              | No                    | 0.000         |
| OAML285    | Chr12:25398284  | C   | T   | KRAS  | c.G35A          | p.G12D        | nonsynonymous SNV    | 0.268          | 164   | Yes              | No                    | 0.000         |
| OAML001    | chr12:25398285  | C   | T   | KRAS  | c.G34A          | p.G12S        | nonsynonymous SNV    | 0.089          | 606   | Yes              | No                    | 0.000         |
| OAML007    | chr12:25398285  | C   | T   | KRAS  | c.G34A          | p.G12S        | nonsynonymous SNV    | 0.026          | 725   | Yes              | No                    | 0.000         |
| OAML274    | chr12:25398285  | C   | A   | KRAS  | c.G34T          | p.G12C        | nonsynonymous SNV    | 0.277          | 602   | Yes              | Yes                   | 0.042         |
| OAML023    | chr11           | .   | .   | MLL   | PTD             |               |                      | .              | .     | Yes              | -                     | -             |
| OAML044    | chr11           | .   | .   | MLL   | PTD             |               |                      | .              | .     | Yes              | -                     | -             |
| OAML049    | chr11           | .   | .   | MLL   | PTD             |               |                      | .              | .     | Yes              | -                     | -             |
| OAML087    | chr11           | .   | .   | MLL   | PTD             |               |                      | .              | .     | Yes              | -                     | -             |
| OAML119    | chr11           | .   | .   | MLL   | PTD             |               |                      | .              | .     | Yes              | -                     | -             |
| OAML124    | chr11           | .   | .   | MLL   | PTD             |               |                      | .              | .     | Yes              | -                     | -             |
| OAML139    | chr11           | .   | .   | MLL   | PTD             |               |                      | .              | .     | Yes              | No                    | 0.000         |
| OAML189    | chr11           | .   | .   | MLL   | PTD             |               |                      | .              | .     | Yes              | -                     | -             |
| OAML194    | chr11           | .   | .   | MLL   | PTD             |               |                      | .              | .     | Yes              | -                     | -             |
| OAML241    | chr11           | .   | .   | MLL   | PTD             |               |                      | .              | .     | Yes              | -                     | -             |
| OAML252    | chr11           | .   | .   | MLL   | PTD             |               |                      | .              | .     | Yes              | -                     | -             |
| OAML280    | chr11           | .   | .   | MLL   | PTD             |               |                      | .              | .     | Yes              | -                     | -             |
| OAML282    | chr11           | .   | .   | MLL   | PTD             |               |                      | .              | .     | Yes              | -                     | -             |
| OAML184    | #N/A            | .   | .   | MLL   | PTD             |               |                      | .              | .     | No               | -                     | -             |
| OAML188    | #N/A            | .   | .   | MLL   | PTD             |               |                      | .              | .     | No               | -                     | -             |
| OAML190    | #N/A            | .   | .   | MLL   | PTD             |               |                      | .              | .     | No               | -                     | -             |
| OAML201    | #N/A            | .   | .   | MLL   | PTD             |               |                      | .              | .     | No               | -                     | -             |
| OAML202    | #N/A            | .   | .   | MLL   | PTD             |               |                      | .              | .     | No               | -                     | -             |
| OAML228    | #N/A            | .   | .   | MLL   | PTD             |               |                      | .              | .     | No               | -                     | -             |
| OAML143    | chr1:43815009   | G   | T   | MPL   | c.G1544T        | p.W515L       | nonsynonymous SNV    | 0.116          | 727   | No               | -                     | -             |
| OAML325    | Chr1:43815009   | G   | T   | MPL   | c.G1544T        | p.W515L       | nonsynonymous SNV    | 0.037          | 485   | No               | -                     | -             |
| OAML196    | chr8:128750684  | C   | T   | MYC   | c.C221T         | p.P74L        | nonsynonymous SNV    | 0.411          | 718   | Yes              | No                    | 0.000         |
| OAML224    | chr8:128750684  | C   | A   | MYC   | c.C221A         | p.P74Q        | nonsynonymous SNV    | 0.439          | 691   | No               | -                     | -             |
| OAML234    | chr8:128750684  | C   | A   | MYC   | c.C221A         | p.P74Q        | nonsynonymous SNV    | 0.343          | 1060  | Yes              | No                    | 0.000         |
| OAML090    | chr17:29490349  | T   | -   | NF1   | c.434delT       | p.L145fs      | frameshift deletion  | 0.020          | 697   | Yes              | No                    | 0.000         |
| OAML046    | chr17:29550586  | G   | A   | NF1   | c.1845+1G>A     |               | splicing             | 0.343          | 286   | Yes              | No                    | 0.000         |
| OAML024    | chr17:29553477  | -   | C   | NF1   | c.2027dupC      | p.T676fs      | frameshift insertion | 0.413          | 854   | No               | -                     | -             |
| OAML024    | chr17:29553477  | -   | C   | NF1   | c.2027dupC      | p.T676fs      | frameshift insertion | 0.413          | 854   | No               | -                     | -             |
| OAML131    | chr17:29553477  | -   | C   | NF1   | c.2027dupC      | p.T676fs      | frameshift insertion | 0.302          | 537   | Yes              | Yes                   | 0.126         |
| OAML280    | chr17:29553477  | -   | C   | NF1   | c.2027dupC      | p.T676fs      | frameshift insertion | 0.475          | 721   | Yes              | Yes                   | 0.317         |
| OAML309    | Chr17:29553477  | -   | C   | NF1   | c.2027dupC      | p.T676fs      | frameshift insertion | 0.045          | 673   | No               | -                     | -             |
| OAML018    | chr17:29664534  | -   | GA  | NF1   | c.6513_6514insC | p.Y2171fs     | frameshift insertion | 0.029          | 747   | Yes              | Yes                   | 0.004         |
| OAML018    | chr17:29667527  | -   | CCT | NF1   | c.6863_6864insC | p.S2288fs     | frameshift insertion | 0.022          | 740   | Yes              | Yes                   | 0.001         |
| OAML130    | chr17:29684326  | C   | T   | NF1   | c.C7846T        | p.R2616X      | stopgain             | 0.422          | 1169  | Yes              | Yes                   | 0.012         |
| OAML277    | chr12:54686301  | -   | CA  | NFE2  | c.978_979insTG  | p.T327_E328fs | stopgain             | 0.360          | 1126  | Yes              | No                    | 0.000         |
| OAML276    | chr12:54686452  | -   | T   | NFE2  | c.827dupA       | p.N276fs      | frameshift insertion | 0.420          | 744   | Yes              | No                    | 0.000         |
| OAML021    | chr12:54686458  | G   | -   | NFE2  | c.822delC       | p.G274fs      | frameshift deletion  | 0.100          | 1215  | Yes              | No                    | 0.000         |
| OAML013    | chr12:54686491  | C   | -   | NFE2  | c.789delG       | p.Q263fs      | frameshift deletion  | 0.250          | 24    | Yes              | No                    | 0.000         |
| OAML021    | chr12:54686618  | -   | C   | NFE2  | c.661dupG       | p.E221fs      | frameshift insertion | 0.156          | 1329  | Yes              | No                    | 0.000         |



| subject_id | chrom:pos_start | ref | var  | gene | cdna           | aa       | Result               | Diagnostic VAF | Depth | Remission Sample | Detected in Remission | Remission VAF |
|------------|-----------------|-----|------|------|----------------|----------|----------------------|----------------|-------|------------------|-----------------------|---------------|
| OAML056    | chr12:54688917  | A   | C    | NFE2 | c.114+2T>G     |          | splicing             | 0.425          | 749   | Yes              | No                    | 0.000         |
| OAML006    | chr5:170837543  | -   | TCTC | NPM1 | c.859_860insTC | p.L287fs | frameshift insertion | 0.096          | 271   | Yes              | No                    | 0.000         |
| OAML010    | chr5:170837543  | -   | TCTC | NPM1 | c.859_860insTC | p.L287fs | frameshift insertion | 0.216          | 190   | Yes              | No                    | 0.000         |
| OAML012    | chr5:170837543  | -   | TCTC | NPM1 | c.859_860insTC | p.L287fs | frameshift insertion | 0.332          | 215   | Yes              | No                    | 0.000         |
| OAML016    | chr5:170837543  | -   | TCTC | NPM1 | c.859_860insTC | p.L287fs | frameshift insertion | 0.205          | 244   | Yes              | No                    | 0.000         |
| OAML020    | chr5:170837543  | -   | TCTC | NPM1 | c.859_860insTC | p.L287fs | frameshift insertion | 0.251          | 177   | Yes              | No                    | 0.000         |
| OAML027    | chr5:170837543  | -   | TCTC | NPM1 | c.859_860insTC | p.L287fs | frameshift insertion | 0.094          | 201   | Yes              | Yes                   | 0.003         |
| OAML031    | chr5:170837543  | -   | TCTC | NPM1 | c.859_860insTC | p.L287fs | frameshift insertion | 0.287          | 167   | Yes              | No                    | 0.000         |
| OAML033    | chr5:170837543  | -   | TCTC | NPM1 | c.859_860insTC | p.L287fs | frameshift insertion | 0.211          | 203   | Yes              | No                    | 0.000         |
| OAML037    | chr5:170837543  | -   | TCTC | NPM1 | c.859_860insTC | p.L287fs | frameshift insertion | 0.223          | 154   | Yes              | No                    | 0.000         |
| OAML040    | chr5:170837543  | -   | TCTC | NPM1 | c.859_860insTC | p.L287fs | frameshift insertion | 0.281          | 202   | Yes              | No                    | 0.000         |
| OAML048    | chr5:170837543  | -   | TCTC | NPM1 | c.859_860insTC | p.L287fs | frameshift insertion | 0.243          | 140   | Yes              | No                    | 0.000         |
| OAML072    | Chr5:170837543  | -   | TCTC | NPM1 | c.859_860insTC | p.L287fs | frameshift insertion | 0.211          | 108   | Yes              | No                    | 0.000         |
| OAML073    | Chr5:170837543  | -   | TCTC | NPM1 | c.859_860insTC | p.L287fs | frameshift insertion | 0.191          | 104   | Yes              | No                    | 0.000         |
| OAML077    | Chr5:170837543  | -   | TCTC | NPM1 | c.859_860insTC | p.L287fs | frameshift insertion | 0.291          | 189   | Yes              | No                    | 0.000         |
| OAML080    | Chr5:170837543  | -   | TCTC | NPM1 | c.859_860insTC | p.L287fs | frameshift insertion | 0.159          | 182   | Yes              | No                    | 0.000         |
| OAML081    | chr5:170837543  | -   | TCTC | NPM1 | c.859_860insTC | p.L287fs | frameshift insertion | 0.272          | 184   | Yes              | No                    | 0.000         |
| OAML083    | chr5:170837543  | -   | TCTC | NPM1 | c.859_860insTC | p.L287fs | frameshift insertion | 0.213          | 197   | Yes              | No                    | 0.000         |
| OAML085    | chr5:170837543  | -   | TCTC | NPM1 | c.859_860insTC | p.L287fs | frameshift insertion | 0.288          | 215   | Yes              | No                    | 0.000         |
| OAML091    | chr5:170837543  | -   | TCTC | NPM1 | c.859_860insTC | p.L287fs | frameshift insertion | 0.259          | 160   | Yes              | Yes                   | 0.003         |
| OAML104    | chr5:170837543  | -   | TCTC | NPM1 | c.859_860insTC | p.L287fs | frameshift insertion | 0.156          | 205   | Yes              | Yes                   | 0.058         |
| OAML141    | chr5:170837543  | -   | TCTC | NPM1 | c.859_860insTC | p.L287fs | frameshift insertion | 0.335          | 187   | No               | .                     | .             |
| OAML152    | chr5:170837543  | -   | TCTC | NPM1 | c.859_860insTC | p.L287fs | frameshift insertion | 0.145          | 179   | Yes              | No                    | 0.000         |
| OAML159    | chr5:170837543  | -   | TCTC | NPM1 | c.859_860insTC | p.L287fs | frameshift insertion | 0.316          | 252   | Yes              | No                    | 0.000         |
| OAML170    | chr5:170837543  | -   | TCTC | NPM1 | c.859_860insTC | p.L287fs | frameshift insertion | 0.333          | 99    | No               | .                     | .             |
| OAML171    | chr5:170837543  | -   | TCTC | NPM1 | c.859_860insTC | p.L287fs | frameshift insertion | 0.315          | 159   | No               | .                     | .             |
| OAML172    | chr5:170837543  | -   | TCTC | NPM1 | c.859_860insTC | p.L287fs | frameshift insertion | 0.293          | 204   | No               | .                     | .             |
| OAML173    | chr5:170837543  | -   | TCTC | NPM1 | c.859_860insTC | p.L287fs | frameshift insertion | 0.245          | 147   | No               | .                     | .             |
| OAML174    | chr5:170837543  | -   | TCTC | NPM1 | c.859_860insTC | p.L287fs | frameshift insertion | 0.277          | 175   | No               | .                     | .             |
| OAML175    | chr5:170837543  | -   | TCTC | NPM1 | c.859_860insTC | p.L287fs | frameshift insertion | 0.110          | 200   | No               | .                     | .             |
| OAML177    | chr5:170837543  | -   | TCTC | NPM1 | c.859_860insTC | p.L287fs | frameshift insertion | 0.270          | 171   | No               | .                     | .             |
| OAML179    | chr5:170837543  | -   | TCTC | NPM1 | c.859_860insTC | p.L287fs | frameshift insertion | 0.276          | 160   | Yes              | No                    | 0.000         |
| OAML180    | chr5:170837543  | -   | TCTC | NPM1 | c.859_860insTC | p.L287fs | frameshift insertion | 0.380          | 166   | No               | .                     | .             |
| OAML185    | chr5:170837543  | -   | TCTC | NPM1 | c.859_860insTC | p.L287fs | frameshift insertion | 0.308          | 117   | No               | .                     | .             |
| OAML193    | chr5:170837543  | -   | TCTC | NPM1 | c.859_860insTC | p.L287fs | frameshift insertion | 0.280          | 105   | Yes              | No                    | 0.000         |
| OAML209    | chr5:170837543  | -   | TCTC | NPM1 | c.859_860insTC | p.L287fs | frameshift insertion | 0.335          | 182   | No               | .                     | .             |
| OAML210    | chr5:170837543  | -   | TCTC | NPM1 | c.859_860insTC | p.L287fs | frameshift insertion | 0.106          | 188   | No               | .                     | .             |
| OAML214    | chr5:170837543  | -   | TCTC | NPM1 | c.859_860insTC | p.L287fs | frameshift insertion | 0.329          | 152   | No               | .                     | .             |
| OAML218    | chr5:170837543  | -   | TCTC | NPM1 | c.859_860insTC | p.L287fs | frameshift insertion | 0.254          | 132   | No               | .                     | .             |
| OAML224    | chr5:170837543  | -   | TCTC | NPM1 | c.859_860insTC | p.L287fs | frameshift insertion | 0.289          | 97    | No               | .                     | .             |
| OAML234    | chr5:170837543  | -   | TCTC | NPM1 | c.859_860insTC | p.L287fs | frameshift insertion | 0.297          | 229   | Yes              | No                    | 0.000         |
| OAML245    | chr5:170837543  | -   | TCTC | NPM1 | c.859_860insTC | p.L287fs | frameshift insertion | 0.258          | 207   | Yes              | No                    | 0.000         |
| OAML255    | chr5:170837543  | -   | TCTC | NPM1 | c.859_860insTC | p.L287fs | frameshift insertion | 0.308          | 222   | Yes              | No                    | 0.000         |
| OAML259    | chr5:170837543  | -   | TCTC | NPM1 | c.859_860insTC | p.L287fs | frameshift insertion | 0.209          | 185   | Yes              | No                    | 0.000         |
| OAML260    | chr5:170837543  | -   | TCTC | NPM1 | c.859_860insTC | p.L287fs | frameshift insertion | 0.273          | 170   | Yes              | No                    | 0.000         |
| OAML261    | chr5:170837543  | -   | TCTC | NPM1 | c.859_860insTC | p.L287fs | frameshift insertion | 0.259          | 196   | Yes              | No                    | 0.000         |
| OAML268    | chr5:170837543  | -   | TCTC | NPM1 | c.859_860insTC | p.L287fs | frameshift insertion | 0.301          | 186   | Yes              | No                    | 0.000         |
| OAML273    | chr5:170837543  | -   | TCTC | NPM1 | c.859_860insTC | p.L287fs | frameshift insertion | 0.329          | 228   | Yes              | No                    | 0.000         |
| OAML275    | chr5:170837543  | -   | TCTC | NPM1 | c.859_860insTC | p.L287fs | frameshift insertion | 0.255          | 143   | Yes              | No                    | 0.000         |
| OAML276    | chr5:170837543  | -   | TCTC | NPM1 | c.859_860insTC | p.L287fs | frameshift insertion | 0.364          | 173   | Yes              | Yes                   | 0.001         |
| OAML278    | chr5:170837543  | -   | TCTC | NPM1 | c.859_860insTC | p.L287fs | frameshift insertion | 0.343          | 138   | Yes              | No                    | 0.000         |
| OAML281    | Chr5:170837543  | -   | TCTC | NPM1 | c.859_860insTC | p.L287fs | frameshift insertion | 0.137          | 50    | Yes              | No                    | 0.000         |
| OAML308    | Chr5:170837543  | -   | TCTC | NPM1 | c.859_860insTC | p.L287fs | frameshift insertion | 0.313          | 396   | No               | .                     | .             |
| OAML321    | Chr5:170837543  | -   | TCTC | NPM1 | c.859_860insTC | p.L287fs | frameshift insertion | 0.296          | 321   | No               | .                     | .             |
| OAML326    | Chr5:170837543  | -   | TCTC | NPM1 | c.859_860insTC | p.L287fs | frameshift insertion | 0.187          | 91    | No               | .                     | .             |
| OAML029    | chr5:170837544  | -   | CTG  | NPM1 | c.860_861insCT | p.L287fs | frameshift insertion | 0.259          | 227   | Yes              | No                    | 0.000         |
| OAML058    | chr5:170837544  | -   | CTG  | NPM1 | c.860_861insCT | p.L287fs | frameshift insertion | 0.085          | 231   | Yes              | No                    | 0.000         |
| OAML196    | chr5:170837544  | -   | CTG  | NPM1 | c.860_861insCT | p.L287fs | frameshift insertion | 0.219          | 119   | Yes              | No                    | 0.000         |
| OAML028    | chr5:170837545  | -   | TGC  | NPM1 | c.861_862insTG | p.L287fs | frameshift insertion | 0.238          | 183   | Yes              | No                    | 0.000         |
| OAML056    | chr5:170837545  | -   | TGC  | NPM1 | c.861_862insTG | p.L287fs | frameshift insertion | 0.319          | 184   | Yes              | No                    | 0.000         |
| OAML097    | chr5:170837545  | -   | TGC  | NPM1 | c.861_862insTG | p.L287fs | frameshift insertion | 0.294          | 184   | Yes              | No                    | 0.000         |
| OAML108    | chr5:170837545  | -   | TGC  | NPM1 | c.861_862insTG | p.L287fs | frameshift insertion | 0.322          | 182   | No               | .                     | .             |
| OAML197    | chr5:170837545  | -   | TGC  | NPM1 | c.861_862insTG | p.L287fs | frameshift insertion | 0.205          | 194   | No               | .                     | .             |
| OAML221    | chr5:170837545  | -   | TGC  | NPM1 | c.861_862insTG | p.L287fs | frameshift insertion | 0.150          | 166   | No               | .                     | .             |
| OAML211    | chr5:170837551  | -   | AAA  | NPM1 | c.867_868insAA | p.Q289fs | frameshift insertion | 0.225          | 191   | No               | .                     | .             |
| OAML093    | chr5:170837553  | -   | TTT  | NPM1 | c.869_870insTT | p.W290fs | frameshift insertion | 0.046          | 151   | Yes              | No                    | 0.000         |
| OAML025    | chr1:115252204  | C   | T    | NRAS | c.G436A        | p.A146T  | nonsynonymous SNV    | 0.093          | 867   | Yes              | Yes                   | 0.001         |
| OAML215    | chr1:115256528  | T   | A    | NRAS | c.A183T        | p.Q61H   | nonsynonymous SNV    | 0.062          | 812   | No               | .                     | .             |
| OAML309    | Chr1:115256528  | T   | A    | NRAS | c.A183T        | p.Q61H   | nonsynonymous SNV    | 0.211          | 882   | No               | .                     | .             |
| OAML029    | chr1:115256529  | T   | C    | NRAS | c.A182G        | p.Q61R   | nonsynonymous SNV    | 0.298          | 852   | Yes              | No                    | 0.000         |
| OAML117    | chr1:115256529  | T   | C    | NRAS | c.A182G        | p.Q61R   | nonsynonymous SNV    | 0.021          | 926   | Yes              | No                    | 0.000         |
| OAML188    | chr1:115256529  | T   | G    | NRAS | c.A182C        | p.Q61P   | nonsynonymous SNV    | 0.299          | 740   | No               | .                     | .             |
| OAML217    | chr1:115256529  | T   | C    | NRAS | c.A182G        | p.Q61R   | nonsynonymous SNV    | 0.432          | 829   | No               | .                     | .             |
| OAML219    | chr1:115256529  | T   | A    | NRAS | c.A182T        | p.Q61L   | nonsynonymous SNV    | 0.170          | 531   | No               | .                     | .             |
| OAML304    | Chr1:115256529  | T   | C    | NRAS | c.A182G        | p.Q61R   | nonsynonymous SNV    | 0.484          | 759   | No               | .                     | .             |

| subject_id | chrom:pos_start | ref | var  | gene   | cdna           | aa        | Result               | Diagnostic VAF | Depth | Remission Sample | Detected in Remission | Remission VAF |
|------------|-----------------|-----|------|--------|----------------|-----------|----------------------|----------------|-------|------------------|-----------------------|---------------|
| OAML102    | chr1:115256530  | G   | T    | NRAS   | c.C181A        | p.Q61K    | nonsynonymous SNV    | 0.460          | 897   | No               | .                     | .             |
| OAML081    | chr1:115256536  | C   | T    | NRAS   | c.G175A        | p.A59T    | nonsynonymous SNV    | 0.090          | 957   | Yes              | No                    | 0.000         |
| OAML001    | chr1:115256744  | C   | T    | NRAS   | c.G38A         | p.G13D    | nonsynonymous SNV    | 0.314          | 1552  | Yes              | Yes                   | 0.003         |
| OAML007    | chr1:115256744  | C   | T    | NRAS   | c.G38A         | p.G13D    | nonsynonymous SNV    | 0.211          | 831   | Yes              | No                    | 0.000         |
| OAML055    | chr1:115256744  | C   | T    | NRAS   | c.G38A         | p.G13D    | nonsynonymous SNV    | 0.027          | 669   | Yes              | No                    | 0.000         |
| OAML173    | chr1:115256744  | C   | T    | NRAS   | c.G38A         | p.G13D    | nonsynonymous SNV    | 0.045          | 642   | No               | .                     | .             |
| OAML267    | chr1:115256744  | C   | A    | NRAS   | c.G38T         | p.G13V    | nonsynonymous SNV    | 0.148          | 638   | Yes              | No                    | 0.000         |
| OAML267    | chr1:115256744  | C   | A    | NRAS   | c.G38T         | p.G13V    | nonsynonymous SNV    | 0.148          | 638   | Yes              | No                    | 0.000         |
| OAML025    | chr1:115256745  | C   | G    | NRAS   | c.G37C         | p.G13R    | nonsynonymous SNV    | 0.211          | 969   | Yes              | No                    | 0.000         |
| OAML188    | chr1:115256745  | C   | G    | NRAS   | c.G37C         | p.G13R    | nonsynonymous SNV    | 0.032          | 729   | No               | .                     | .             |
| OAML267    | chr1:115256745  | C   | G    | NRAS   | c.G37C         | p.G13R    | nonsynonymous SNV    | 0.033          | 843   | Yes              | No                    | 0.000         |
| OAML023    | chr1:115256747  | C   | T    | NRAS   | c.G35A         | p.G12D    | nonsynonymous SNV    | 0.173          | 989   | Yes              | No                    | 0.000         |
| OAML033    | chr1:115256747  | C   | A    | NRAS   | c.G35T         | p.G12V    | nonsynonymous SNV    | 0.033          | 960   | Yes              | No                    | 0.000         |
| OAML052    | chr1:115256747  | C   | T    | NRAS   | c.G35A         | p.G12D    | nonsynonymous SNV    | 0.084          | 798   | Yes              | No                    | 0.000         |
| OAML054    | chr1:115256747  | C   | T    | NRAS   | c.G35A         | p.G12D    | nonsynonymous SNV    | 0.270          | 790   | No               | .                     | .             |
| OAML056    | chr1:115256747  | C   | T    | NRAS   | c.G35A         | p.G12D    | nonsynonymous SNV    | 0.133          | 853   | Yes              | No                    | 0.000         |
| OAML066    | chr1:115256747  | C   | T    | NRAS   | c.G35A         | p.G12D    | nonsynonymous SNV    | 0.103          | 1059  | Yes              | Yes                   | 0.001         |
| OAML096    | chr1:115256747  | C   | G    | NRAS   | c.G35C         | p.G12A    | nonsynonymous SNV    | 0.042          | 731   | No               | .                     | .             |
| OAML096    | chr1:115256747  | C   | T    | NRAS   | c.G35A         | p.G12D    | nonsynonymous SNV    | 0.267          | 955   | No               | .                     | .             |
| OAML108    | chr1:115256747  | C   | T    | NRAS   | c.G35A         | p.G12D    | nonsynonymous SNV    | 0.147          | 983   | No               | .                     | .             |
| OAML125    | chr1:115256747  | C   | G    | NRAS   | c.G35C         | p.G12A    | nonsynonymous SNV    | 0.406          | 795   | Yes              | Yes                   | 0.036         |
| OAML127    | chr1:115256747  | C   | T    | NRAS   | c.G35A         | p.G12D    | nonsynonymous SNV    | 0.406          | 807   | Yes              | Yes                   | 0.393         |
| OAML140    | chr1:115256747  | C   | T    | NRAS   | c.G35A         | p.G12D    | nonsynonymous SNV    | 0.023          | 791   | No               | .                     | .             |
| OAML144    | chr1:115256747  | C   | T    | NRAS   | c.G35A         | p.G12D    | nonsynonymous SNV    | 0.224          | 662   | Yes              | No                    | 0.000         |
| OAML188    | chr1:115256747  | C   | G    | NRAS   | c.G35C         | p.G12A    | nonsynonymous SNV    | 0.071          | 741   | No               | .                     | .             |
| OAML196    | chr1:115256747  | C   | A    | NRAS   | c.G35T         | p.G12V    | nonsynonymous SNV    | 0.024          | 546   | Yes              | No                    | 0.000         |
| OAML253    | chr1:115256747  | C   | A    | NRAS   | c.G35T         | p.G12V    | nonsynonymous SNV    | 0.023          | 772   | Yes              | No                    | 0.000         |
| OAML264    | chr1:115256747  | C   | T    | NRAS   | c.G35A         | p.G12D    | nonsynonymous SNV    | 0.074          | 673   | Yes              | Yes                   | 0.017         |
| OAML309    | Chr1:115256747  | C   | T    | NRAS   | c.G35A         | p.G12D    | nonsynonymous SNV    | 0.048          | 807   | No               | .                     | .             |
| OAML010    | chr1:115256748  | C   | T    | NRAS   | c.G34A         | p.G12S    | nonsynonymous SNV    | 0.224          | 700   | Yes              | No                    | 0.000         |
| OAML025    | chr1:115256748  | C   | A    | NRAS   | c.G34T         | p.G12C    | nonsynonymous SNV    | 0.094          | 990   | Yes              | No                    | 0.000         |
| OAML077    | Chr1:115256748  | C   | A    | NRAS   | c.G34T         | p.G12C    | nonsynonymous SNV    | 0.285          | 666   | Yes              | No                    | 0.000         |
| OAML129    | chr1:115256748  | C   | T    | NRAS   | c.G34A         | p.G12S    | nonsynonymous SNV    | 0.074          | 812   | Yes              | No                    | 0.000         |
| OAML273    | chr1:115256748  | C   | T    | NRAS   | c.G34A         | p.G12S    | nonsynonymous SNV    | 0.027          | 786   | Yes              | No                    | 0.000         |
| OAML288    | Chr1:115256748  | C   | T    | NRAS   | c.G34A         | p.G12S    | nonsynonymous SNV    | 0.045          | 311   | Yes              | No                    | 0.000         |
| OAML293    | Chr1:115256748  | C   | G    | NRAS   | c.G34C         | p.G12R    | nonsynonymous SNV    | 0.420          | 617   | No               | .                     | .             |
| OAML223    | chr13:33344887  | C   | -    | PD55B  | c.4160delC     | p.P1387fs | frameshift deletion  | 0.047          | 264   | No               | .                     | .             |
| OAML084    | chrX:133511668  | -   | A    | PHF6   | c.22dupA       | p.Q7fs    | frameshift insertion | 0.024          | 209   | Yes              | No                    | 0.000         |
| OAML186    | chrX:133511668  | -   | A    | PHF6   | c.22dupA       | p.Q7fs    | frameshift insertion | 0.793          | 145   | No               | .                     | .             |
| OAML207    | chrX:133511716  | -   | A    | PHF6   | c.70dupA       | p.N23fs   | frameshift insertion | 0.026          | 265   | No               | .                     | .             |
| OAML144    | chrX:133511720  | -   | C    | PHF6   | c.73_74insC    | p.D25fs   | frameshift insertion | 0.738          | 221   | Yes              | Yes                   | 0.011         |
| OAML213    | chrX:133527949  | C   | T    | PHF6   | c.C385T        | p.R129X   | stopgain             | 0.879          | 181   | No               | .                     | .             |
| OAML237    | chrX:133527984  | T   | C    | PHF6   | c.418+2T>C     |           | splicing             | 0.092          | 164   | Yes              | No                    | 0.000         |
| OAML060    | chrX:133547549  | -   | GAAI | PHF6   | c.447_448insGA | p.H149fs  | frameshift insertion | 0.083          | 278   | Yes              | No                    | 0.000         |
| OAML025    | chrX:133547940  | C   | T    | PHF6   | c.C673T        | p.R225X   | stopgain             | 0.893          | 421   | Yes              | Yes                   | 0.001         |
| OAML290    | ChrX:133547982  | C   | T    | PHF6   | c.C715T        | p.H239Y   | nonsynonymous SNV    | 0.465          | 271   | Yes              | No                    | 0.000         |
| OAML113    | chrX:133547992  | G   | A    | PHF6   | c.G725A        | p.C242Y   | nonsynonymous SNV    | 0.229          | 410   | Yes              | No                    | 0.000         |
| OAML303    | ChrX:133549101  | A   | T    | PHF6   | c.A785T        | p.D262V   | nonsynonymous SNV    | 0.639          | 144   | No               | .                     | .             |
| OAML312    | ChrX:133549146  | A   | G    | PHF6   | c.G830C        | p.R277T   | nonsynonymous SNV    | 0.040          | 348   | No               | .                     | .             |
| OAML168    | chrX:133551197  | A   | C    | PHF6   | c.835-2A>G     |           | splicing             | 0.465          | 480   | No               | .                     | .             |
| OAML202    | chrX:133551236  | G   | A    | PHF6   | c.G872A        | p.G291E   | nonsynonymous SNV    | 0.880          | 125   | No               | .                     | .             |
| OAML274    | chrX:133551254  | G   | A    | PHF6   | c.G890A        | p.C297Y   | nonsynonymous SNV    | 0.033          | 243   | Yes              | Yes                   | 0.005         |
| OAML269    | chrX:133551258  | T   | -    | PHF6   | c.894delT      | p.V298fs  | frameshift deletion  | 0.050          | 662   | Yes              | No                    | 0.000         |
| OAML190    | ChrX:133551267  | C   | G    | PHF6   | c.C903G        | p.Y301X   | stopgain             | 0.167          | 192   | No               | .                     | .             |
| OAML167    | chrX:133551296  | C   | G    | PHF6   | c.C932G        | p.A311G   | nonsynonymous SNV    | 0.915          | 201   | No               | .                     | .             |
| OAML146    | chrX:133551305  | T   | C    | PHF6   | c.T941C        | p.I314T   | nonsynonymous SNV    | 0.426          | 465   | Yes              | No                    | 0.000         |
| OAML266    | chrX:133551319  | C   | T    | PHF6   | c.C955T        | p.R319X   | stopgain             | 0.491          | 383   | Yes              | No                    | 0.000         |
| OAML142    | chrX:133551328  | T   | C    | PHF6   | c.T964C        | p.Y322H   | nonsynonymous SNV    | 0.759          | 212   | No               | .                     | .             |
| OAML312    | ChrX:133559289  | G   | T    | PHF6   | c.G1027T       | p.E343X   | stopgain             | 0.101          | 277   | No               | .                     | .             |
| OAML111    | chr17:58740438  | A   | -    | PPM1D  | c.1343delA     | p.N448fs  | frameshift deletion  | 0.449          | 789   | Yes              | Yes                   | 0.021         |
| OAML026    | chr17:58740546  | T   | G    | PPM1D  | c.T1451G       | p.L484X   | stopgain             | 0.115          | 1091  | Yes              | Yes                   | 0.032         |
| OAML264    | chr17:58740572  | 0   | -    | PPM1D  | c.1477_1487del | p.S493fs  | frameshift deletion  | 0.370          | 775   | Yes              | Yes                   | 0.004         |
| OAML195    | chr17:58740623  | C   | -    | PPM1D  | c.1528delC     | p.Q510fs  | frameshift deletion  | 0.452          | 533   | Yes              | Yes                   | 0.304         |
| OAML166    | chr17:1563289   | C   | T    | PRPF8  | c.G4792A       | p.D1598N  | nonsynonymous SNV    | 0.428          | 587   | No               | .                     | .             |
| OAML211    | chr12:112888156 | A   | G    | PTPN11 | c.A172G        | p.N58D    | nonsynonymous SNV    | 0.021          | 711   | No               | .                     | .             |
| OAML254    | chr12:112888156 | A   | T    | PTPN11 | c.A172T        | p.N58Y    | nonsynonymous SNV    | 0.114          | 660   | Yes              | No                    | 0.000         |
| OAML029    | chr12:112888163 | G   | T    | PTPN11 | c.G179T        | p.G60V    | nonsynonymous SNV    | 0.081          | 627   | Yes              | No                    | 0.000         |
| OAML108    | chr12:112888163 | G   | C    | PTPN11 | c.G179C        | p.G60A    | nonsynonymous SNV    | 0.062          | 761   | No               | .                     | .             |
| OAML158    | chr12:112888165 | G   | C    | PTPN11 | c.G181C        | p.D61H    | nonsynonymous SNV    | 0.035          | 878   | Yes              | Yes                   | 0.076         |
| OAML303    | Chr12:112888165 | G   | T    | PTPN11 | c.G181T        | p.D61Y    | nonsynonymous SNV    | 0.302          | 559   | No               | .                     | .             |
| OAML261    | chr12:112888166 | A   | T    | PTPN11 | c.A182T        | p.D61V    | nonsynonymous SNV    | 0.022          | 580   | Yes              | No                    | 0.000         |
| OAML282    | Chr12:112888166 | A   | T    | PTPN11 | c.A182T        | p.D61V    | nonsynonymous SNV    | 0.174          | 196   | Yes              | No                    | 0.000         |
| OAML170    | chr12:112888195 | T   | A    | PTPN11 | c.T211A        | p.F71I    | nonsynonymous SNV    | 0.431          | 452   | No               | .                     | .             |
| OAML080    | Chr12:112888199 | C   | T    | PTPN11 | c.C215T        | p.A72V    | nonsynonymous SNV    | 0.021          | 576   | Yes              | Yes                   | 0.001         |
| OAML081    | chr12:112888199 | C   | T    | PTPN11 | c.C215T        | p.A72V    | nonsynonymous SNV    | 0.091          | 837   | Yes              | Yes                   | 0.001         |

| subject_id | chrom:pos_start | ref | var  | gene   | cdna                      | aa          | Result               | Diagnostic VAF | Depth | Remission Sample | Detected in Remission | Remission VAF |
|------------|-----------------|-----|------|--------|---------------------------|-------------|----------------------|----------------|-------|------------------|-----------------------|---------------|
| OAML109    | chr12:112888199 | C   | T    | PTPN11 | c.C215T                   | p.A72V      | nonsynonymous SNV    | 0.282          | 804   | No               | .                     | .             |
| OAML254    | chr12:112888199 | C   | T    | PTPN11 | c.C215T                   | p.A72V      | nonsynonymous SNV    | 0.104          | 761   | Yes              | Yes                   | 0.001         |
| OAML083    | chr12:112888202 | C   | T    | PTPN11 | c.C218T                   | p.T73I      | nonsynonymous SNV    | 0.042          | 929   | Yes              | No                    | 0.000         |
| OAML158    | chr12:112888202 | C   | T    | PTPN11 | c.C218T                   | p.T73I      | nonsynonymous SNV    | 0.224          | 958   | Yes              | Yes                   | 0.211         |
| OAML258    | chr12:112888202 | C   | T    | PTPN11 | c.C218T                   | p.T73I      | nonsynonymous SNV    | 0.072          | 740   | Yes              | No                    | 0.000         |
| OAML179    | chr12:112888210 | G   | A    | PTPN11 | c.G226A                   | p.E76K      | nonsynonymous SNV    | 0.025          | 552   | Yes              | No                    | 0.000         |
| OAML285    | Chr12:112888210 | G   | C    | PTPN11 | c.G226C                   | p.E76Q      | nonsynonymous SNV    | 0.070          | 214   | Yes              | No                    | 0.000         |
| OAML081    | chr12:112888211 | A   | G    | PTPN11 | c.A227G                   | p.E76G      | nonsynonymous SNV    | 0.211          | 830   | Yes              | No                    | 0.000         |
| OAML254    | chr12:112888211 | A   | T    | PTPN11 | c.A227T                   | p.E76V      | nonsynonymous SNV    | 0.138          | 752   | Yes              | No                    | 0.000         |
| OAML261    | chr12:112888301 | A   | C    | PTPN11 | c.A317C                   | p.D106A     | nonsynonymous SNV    | 0.338          | 429   | Yes              | No                    | 0.000         |
| OAML057    | chr12:112910785 | G   | A    | PTPN11 | c.G794A                   | p.R265Q     | nonsynonymous SNV    | 0.049          | 708   | Yes              | No                    | 0.000         |
| OAML255    | chr12:112915523 | A   | G    | PTPN11 | c.A922G                   | p.N308D     | nonsynonymous SNV    | 0.398          | 719   | Yes              | Yes                   | 0.001         |
| OAML083    | chr12:112915524 | A   | C    | PTPN11 | c.A923C                   | p.N308T     | nonsynonymous SNV    | 0.077          | 815   | Yes              | No                    | 0.000         |
| OAML245    | chr12:112926248 | G   | A    | PTPN11 | c.G1381A                  | p.A461T     | nonsynonymous SNV    | 0.030          | 810   | Yes              | No                    | 0.000         |
| OAML277    | chr12:112926884 | T   | G    | PTPN11 | c.T1504G                  | p.S502A     | nonsynonymous SNV    | 0.035          | 927   | Yes              | No                    | 0.000         |
| OAML016    | chr12:112926888 | G   | A    | PTPN11 | c.G1508A                  | p.G503E     | nonsynonymous SNV    | 0.247          | 930   | Yes              | No                    | 0.000         |
| OAML122    | chr12:112926888 | G   | C    | PTPN11 | c.G1508C                  | p.G503A     | nonsynonymous SNV    | 0.301          | 940   | Yes              | Yes                   | 0.004         |
| OAML100    | chr12:112926909 | A   | T    | PTPN11 | c.A1529T                  | p.Q510L     | nonsynonymous SNV    | 0.032          | 883   | No               | .                     | .             |
| OAML222    | chr8:117859816  | G   | A    | RAD21  | c.C1819T                  | p.Q607X     | stopgain             | 0.335          | 669   | No               | .                     | .             |
| OAML197    | chr8:117861253  | C   | -    | RAD21  | c.1638delG                | p.G546fs    | frameshift deletion  | 0.438          | 657   | No               | .                     | .             |
| OAML276    | chr8:117862901  | 0   | -    | RAD21  | c.1575_1576del            | p.K525fs    | frameshift deletion  | 0.479          | 568   | Yes              | Yes                   | 0.005         |
| OAML141    | chr8:117868464  | T   | -    | RAD21  | c.878delA                 | p.Q293fs    | frameshift deletion  | 0.485          | 507   | No               | .                     | .             |
| OAML223    | chr8:117868527  | 0   | -    | RAD21  | c.815delT                 | p.M272fs    | frameshift deletion  | 0.230          | 160   | No               | .                     | .             |
| OAML263    | chr8:117868892  | -   | TTTC | RAD21  | c.806_807insGA            | p.N269fs    | frameshift insertion | 0.302          | 701   | Yes              | Yes                   | 0.001         |
| OAML224    | chr1:155874261  | C   | G    | RIT1   | c.G270C                   | p.M90I      | nonsynonymous SNV    | 0.078          | 629   | No               | .                     | .             |
| OAML193    | chr1:155874286  | A   | C    | RIT1   | c.T245G                   | p.F82C      | nonsynonymous SNV    | 0.054          | 591   | Yes              | No                    | 0.000         |
| OAML100    | chr1:155874289  | T   | G    | RIT1   | c.A242C                   | p.E81A      | nonsynonymous SNV    | 0.180          | 886   | No               | .                     | .             |
| OAML176    | chr20:62321155  | A   | -    | RTEL1  | c.2078delA                | p.Q693fs    | frameshift deletion  | 0.477          | 968   | No               | .                     | .             |
| OAML240    | chr21:36164504  | -   | C    | RUNX1  | c.1370dupG                | p.G457fs    | frameshift insertion | 0.091          | 419   | Yes              | No                    | 0.000         |
| OAML236    | chr21:36164523  | -   | CG   | RUNX1  | c.1351_1352insC           | p.D451fs    | frameshift insertion | 0.112          | 338   | Yes              | No                    | 0.000         |
| OAML168    | chr21:36164702  | -   | G    | RUNX1  | c.1172dupC                | p.A391fs    | frameshift insertion | 0.478          | 633   | No               | .                     | .             |
| OAML007    | chr21:36164745  | -   | A    | RUNX1  | c.1129dupT                | p.Y377fs    | frameshift insertion | 0.412          | 679   | Yes              | Yes                   | 0.005         |
| OAML142    | chr21:36164771  | 0   | -    | RUNX1  | c.1097_1104del            | p.I366fs    | frameshift deletion  | 0.304          | 749   | No               | .                     | .             |
| OAML191    | chr21:36164790  | -   | TCTA | RUNX1  | c.1084_1085insA           | p.S362_G363 | stopgain             | 0.330          | 590   | No               | .                     | .             |
| OAML133    | chr21:36164804  | -   | G    | RUNX1  | c.1070dupC                | p.P357fs    | frameshift insertion | 0.193          | 1083  | Yes              | No                    | 0.000         |
| OAML057    | chr21:36164810  | G   | T    | RUNX1  | c.C1065A                  | p.Y355X     | stopgain             | 0.799          | 724   | Yes              | No                    | 0.000         |
| OAML202    | chr21:36164838  | -   | G    | RUNX1  | c.1036dupC                | p.R346fs    | frameshift insertion | 0.474          | 192   | No               | .                     | .             |
| OAML166    | chr21:36164859  | -   | GCG  | RUNX1  | c.1015_1016insC           | p.L339fs    | frameshift insertion | 0.140          | 498   | No               | .                     | .             |
| OAML263    | chr21:36164865  | 0   | -    | RUNX1  | c.1007_1010del            | p.F386fs    | frameshift deletion  | 0.219          | 525   | Yes              | No                    | 0.000         |
| OAML290    | Chr21:36164895  | -   | GGT  | RUNX1  | c.979_980insCG            | p.L327fs    | frameshift insertion | 0.313          | 305   | Yes              | No                    | 0.000         |
| OAML120    | chr21:36164898  | -   | CGG  | RUNX1  | c.976_977insCC            | p.D326fs    | frameshift insertion | 0.062          | 503   | Yes              | Yes                   | 0.039         |
| OAML285    | Chr21:36171600  | -   | A    | RUNX1  | c.964dupT                 | p.S322fs    | frameshift insertion | 0.304          | 240   | Yes              | No                    | 0.000         |
| OAML240    | chr21:36171612  | -   | A    | RUNX1  | c.952dupT                 | p.S318fs    | frameshift insertion | 0.291          | 848   | Yes              | No                    | 0.000         |
| OAML303    | Chr21:36171612  | -   | A    | RUNX1  | c.952dupT                 | p.S318fs    | frameshift insertion | 0.342          | 695   | No               | .                     | .             |
| OAML325    | Chr21:36171634  | -   | CATC | RUNX1  | c.930_931insGC            | p.T311_T312 | stopgain             | 0.285          | 463   | No               | .                     | .             |
| OAML198    | chr21:36171635  | -   | A    | RUNX1  | c.929dupT                 | p.M310fs    | frameshift insertion | 0.121          | 495   | Yes              | Yes                   | 0.043         |
| OAML054    | chr21:36171709  | G   | A    | RUNX1  | c.C856T                   | p.Q286X     | stopgain             | 0.326          | 876   | No               | .                     | .             |
| OAML015    | chr21:36171729  | C   | T    | RUNX1  | c.G836A                   | p.W279X     | stopgain             | 0.410          | 539   | Yes              | Yes                   | 0.004         |
| OAML219    | chr21:36206704  | 0   | -    | RUNX1  | RUNX1(NM_001754):exon7.rs |             | splicing             | 0.591          | 208   | No               | .                     | .             |
| OAML309    | Chr21:36206706  | C   | A    | RUNX1  | c.805+1G>T                |             | splicing             | 0.300          | 327   | No               | .                     | .             |
| OAML280    | chr21:36206773  | -   | T    | RUNX1  | c.738_739insA             | p.P247fs    | frameshift insertion | 0.418          | 521   | Yes              | Yes                   | 0.151         |
| OAML099    | chr21:36206778  | 0   | -    | RUNX1  | c.721_734del              | p.H241fs    | frameshift deletion  | 0.463          | 1198  | Yes              | Yes                   | 0.002         |
| OAML076    | Chr21:36206845  | C   | A    | RUNX1  | c.G667T                   | p.E223X     | stopgain             | 0.351          | 478   | Yes              | Yes                   | 0.322         |
| OAML076    | Chr21:36206845  | C   | A    | RUNX1  | c.G667T                   | p.E223X     | stopgain             | 0.351          | 478   | Yes              | Yes                   | 0.322         |
| OAML113    | chr21:36206874  | T   | -    | RUNX1  | c.638delA                 | p.Q213fs    | frameshift deletion  | 0.123          | 554   | Yes              | No                    | 0.000         |
| OAML258    | chr21:36206890  | 0   | -    | RUNX1  | c.621_622del              | p.R207fs    | frameshift deletion  | 0.285          | 404   | Yes              | Yes                   | 0.001         |
| OAML123    | chr21:36206893  | G   | A    | RUNX1  | c.C619T                   | p.R207W     | nonsynonymous SNV    | 0.056          | 444   | Yes              | Yes                   | 0.008         |
| OAML190    | Chr21:36231770  | -   | T    | RUNX1  | c.613+1->A                |             | splicing             | 0.504          | 421   | No               | .                     | .             |
| OAML243    | chr21:36231773  | C   | T    | RUNX1  | c.G611A                   | p.R204Q     | nonsynonymous SNV    | 0.860          | 728   | Yes              | Yes                   | 0.406         |
| OAML025    | chr21:36231774  | G   | A    | RUNX1  | c.C610T                   | p.R204X     | stopgain             | 0.101          | 849   | Yes              | No                    | 0.000         |
| OAML213    | chr21:36231774  | G   | A    | RUNX1  | c.C610T                   | p.R204X     | stopgain             | 0.833          | 722   | No               | .                     | .             |
| OAML274    | chr21:36231782  | C   | T    | RUNX1  | c.G602A                   | p.R201Q     | nonsynonymous SNV    | 0.357          | 749   | Yes              | Yes                   | 0.192         |
| OAML053    | chr21:36231785  | G   | A    | RUNX1  | c.C599T                   | p.P200L     | nonsynonymous SNV    | 0.463          | 708   | Yes              | No                    | 0.000         |
| OAML151    | chr21:36231790  | A   | -    | RUNX1  | c.594delT                 | p.D198fs    | frameshift deletion  | 0.050          | 744   | Yes              | No                    | 0.000         |
| OAML238    | chr21:36231791  | T   | C    | RUNX1  | c.A593G                   | p.D198G     | nonsynonymous SNV    | 0.734          | 730   | Yes              | No                    | 0.000         |
| OAML251    | chr21:36231791  | T   | C    | RUNX1  | c.A593G                   | p.D198G     | nonsynonymous SNV    | 0.424          | 707   | Yes              | No                    | 0.000         |
| OAML001    | chr21:36231792  | C   | T    | RUNX1  | c.G592A                   | p.D198N     | nonsynonymous SNV    | 0.504          | 572   | Yes              | No                    | 0.000         |
| OAML139    | chr21:36231792  | C   | A    | RUNX1  | c.G592T                   | p.D198Y     | nonsynonymous SNV    | 0.079          | 768   | Yes              | No                    | 0.000         |
| OAML017    | chr21:36231813  | T   | A    | RUNX1  | c.A571T                   | p.R191X     | stopgain             | 0.331          | 523   | Yes              | Yes                   | 0.300         |
| OAML120    | chr21:36231822  | T   | C    | RUNX1  | c.A562G                   | p.T188A     | nonsynonymous SNV    | 0.022          | 859   | Yes              | No                    | 0.000         |
| OAML135    | chr21:36231831  | G   | A    | RUNX1  | c.C553T                   | p.Q185X     | stopgain             | 0.182          | 379   | No               | .                     | .             |
| OAML124    | chr21:36252856  | -   | T    | RUNX1  | c.505dupA                 | p.R169fs    | frameshift insertion | 0.191          | 839   | Yes              | No                    | 0.000         |
| OAML237    | chr21:36252856  | -   | T    | RUNX1  | c.505dupA                 | p.R169fs    | frameshift insertion | 0.024          | 635   | Yes              | No                    | 0.000         |
| OAML130    | chr21:36252865  | C   | A    | RUNX1  | c.G497T                   | p.R166L     | nonsynonymous SNV    | 0.496          | 1163  | Yes              | Yes                   | 0.019         |
| OAML151    | chr21:36252865  | C   | T    | RUNX1  | c.G497A                   | p.R166Q     | nonsynonymous SNV    | 0.355          | 888   | Yes              | Yes                   | 0.001         |

| subject_id | chrom.pos_start | ref | var  | gene   | cdna           | aa           | Result                  | Diagnostic VAF | Depth | Remission Sample | Detected in Remission | Remission VAF |
|------------|-----------------|-----|------|--------|----------------|--------------|-------------------------|----------------|-------|------------------|-----------------------|---------------|
| OAML182    | chr21:36252865  | C   | T    | RUNX1  | c.G497A        | p.R166Q      | nonsynonymous SNV       | 0.970          | 436   | No               | -                     | -             |
| OAML099    | chr21:36252867  | -   | C    | RUNX1  | c.494dupG      | p.G165fs     | frameshift insertion    | 0.208          | 530   | Yes              | No                    | 0.000         |
| OAML051    | chr21:36252869  | C   | G    | RUNX1  | c.G493C        | p.G165R      | nonsynonymous SNV       | 0.034          | 649   | Yes              | No                    | 0.000         |
| OAML106    | chr21:36252877  | C   | T    | RUNX1  | c.G485A        | p.R162K      | nonsynonymous SNV       | 0.167          | 562   | Yes              | No                    | 0.000         |
| OAML205    | chr21:36252878  | T   | C    | RUNX1  | c.A484G        | p.R162G      | nonsynonymous SNV       | 0.449          | 902   | No               | -                     | -             |
| OAML117    | chr21:36252902  | G   | A    | RUNX1  | c.C460T        | p.Q154X      | stopgain                | 0.404          | 1071  | Yes              | No                    | 0.000         |
| OAML205    | chr21:36252916  | -   | CGG  | RUNX1  | c.445_446insGC | p.A149_A15K  | stopgain                | 0.212          | 849   | No               | -                     | -             |
| OAML212    | chr21:36252916  | -   | CGG  | RUNX1  | c.445_446insGC | p.A149_A15K  | stopgain                | 0.176          | 793   | No               | -                     | -             |
| OAML258    | chr21:36252916  | G   | T    | RUNX1  | c.C446A        | p.A149E      | nonsynonymous SNV       | 0.100          | 944   | Yes              | No                    | 0.000         |
| OAML044    | chr21:36252938  | -   | CGG  | RUNX1  | c.423_424insAG | p.A142fs     | frameshift insertion    | 0.195          | 671   | Yes              | No                    | 0.000         |
| OAML263    | chr21:36252939  | -   | TTTT | RUNX1  | c.422_423insCA | p.S141delins | nonframeshift insertion | 0.243          | 722   | Yes              | No                    | 0.000         |
| OAML258    | chr21:36252940  | G   | C    | RUNX1  | c.C422G        | p.S141W      | nonsynonymous SNV       | 0.178          | 905   | Yes              | Yes                   | 0.001         |
| OAML017    | chr21:36252952  | T   | C    | RUNX1  | c.A410G        | p.D137G      | nonsynonymous SNV       | 0.303          | 650   | Yes              | Yes                   | 0.305         |
| OAML155    | chr21:36252958  | C   | T    | RUNX1  | c.G404A        | p.G135D      | nonsynonymous SNV       | 0.449          | 1251  | Yes              | No                    | 0.000         |
| OAML203    | chr21:36252965  | 0   | -    | RUNX1  | c.396_397del   | p.V132fs     | frameshift deletion     | 0.311          | 830   | No               | -                     | -             |
| OAML015    | chr21:36252967  | T   | -    | RUNX1  | c.375delA      | p.P125fs     | frameshift deletion     | 0.035          | 603   | Yes              | Yes                   | 0.001         |
| OAML124    | chr21:36252998  | C   | -    | RUNX1  | c.364delG      | p.G122fs     | frameshift deletion     | 0.054          | 962   | Yes              | No                    | 0.000         |
| OAML151    | chr21:36253000  | A   | G    | RUNX1  | c.T362C        | p.L121P      | nonsynonymous SNV       | 0.230          | 936   | Yes              | Yes                   | 0.001         |
| OAML237    | chr21:36253009  | A   | T    | RUNX1  | c.T353A        | p.V118E      | nonsynonymous SNV       | 0.426          | 625   | Yes              | Yes                   | 0.002         |
| OAML076    | Chr21:36259139  | C   | A    | RUNX1  | c.351+1G>T     |              | splicing                | 0.037          | 514   | Yes              | Yes                   | 0.012         |
| OAML076    | Chr21:36259139  | C   | A    | RUNX1  | c.351+1G>T     |              | splicing                | 0.037          | 514   | Yes              | Yes                   | 0.012         |
| OAML206    | chr21:36259139  | C   | T    | RUNX1  | c.351+1G>A     |              | splicing                | 0.449          | 621   | No               | -                     | -             |
| OAML167    | chr21:36259172  | G   | A    | RUNX1  | c.C319T        | p.R107C      | nonsynonymous SNV       | 0.924          | 486   | No               | -                     | -             |
| OAML153    | chr21:36259175  | A   | G    | RUNX1  | c.T316C        | p.W106R      | nonsynonymous SNV       | 0.813          | 459   | Yes              | Yes                   | 0.460         |
| OAML253    | chr21:36259195  | C   | T    | RUNX1  | c.G296A        | p.C99Y       | nonsynonymous SNV       | 0.444          | 870   | Yes              | Yes                   | 0.376         |
| OAML212    | chr21:36259198  | A   | -    | RUNX1  | c.293delT      | p.L98fs      | frameshift deletion     | 0.360          | 766   | No               | -                     | -             |
| OAML147    | chr21:36421143  | -   | GCG  | RUNX1  | c.53_54insTCGC | p.M18fs      | frameshift insertion    | 0.076          | 383   | Yes              | No                    | 0.000         |
| OAML024    | chr18:42531907  | G   | A    | SETBP1 | c.G2602A       | p.D868N      | nonsynonymous SNV       | 0.331          | 378   | No               | -                     | -             |
| OAML182    | chr18:42531907  | G   | A    | SETBP1 | c.G2602A       | p.D868N      | nonsynonymous SNV       | 0.405          | 178   | No               | -                     | -             |
| OAML073    | Chr3:47125247   | A   | T    | SETD2  | c.T6023A       | p.L2008X     | stopgain                | 0.065          | 276   | Yes              | No                    | 0.000         |
| OAML073    | Chr3:47155365   | C   | G    | SETD2  | c.4715+1G>C    |              | splicing                | 0.042          | 193   | Yes              | No                    | 0.000         |
| OAML114    | chr2:198266494  | T   | C    | SF3B1  | c.A2342G       | p.D781G      | nonsynonymous SNV       | 0.118          | 646   | Yes              | Yes                   | 0.009         |
| OAML122    | chr2:198266611  | C   | T    | SF3B1  | c.G2225A       | p.G742D      | nonsynonymous SNV       | 0.336          | 685   | Yes              | Yes                   | 0.022         |
| OAML017    | chr2:198266834  | T   | C    | SF3B1  | c.A2098G       | p.K700E      | nonsynonymous SNV       | 0.341          | 478   | Yes              | Yes                   | 0.288         |
| OAML059    | chr2:198266834  | T   | C    | SF3B1  | c.A2098G       | p.K700E      | nonsynonymous SNV       | 0.226          | 855   | Yes              | No                    | 0.000         |
| OAML092    | chr2:198266834  | T   | C    | SF3B1  | c.A2098G       | p.K700E      | nonsynonymous SNV       | 0.082          | 526   | No               | -                     | -             |
| OAML151    | chr2:198266834  | T   | C    | SF3B1  | c.A2098G       | p.K700E      | nonsynonymous SNV       | 0.405          | 723   | Yes              | Yes                   | 0.001         |
| OAML219    | chr2:198266834  | T   | C    | SF3B1  | c.A2098G       | p.K700E      | nonsynonymous SNV       | 0.301          | 472   | No               | -                     | -             |
| OAML258    | chr2:198266834  | T   | C    | SF3B1  | c.A2098G       | p.K700E      | nonsynonymous SNV       | 0.347          | 736   | Yes              | Yes                   | 0.028         |
| OAML311    | Chr2:198266834  | T   | C    | SF3B1  | c.A2098G       | p.K700E      | nonsynonymous SNV       | 0.069          | 568   | No               | -                     | -             |
| OAML243    | chr2:198267359  | C   | A    | SF3B1  | c.G1998T       | p.K666N      | nonsynonymous SNV       | 0.442          | 789   | Yes              | Yes                   | 0.317         |
| OAML115    | chr2:198267360  | T   | A    | SF3B1  | c.A1997T       | p.K666M      | nonsynonymous SNV       | 0.477          | 755   | No               | -                     | -             |
| OAML314    | Chr2:198267484  | G   | A    | SF3B1  | c.C1873T       | p.R625C      | nonsynonymous SNV       | 0.524          | 21    | No               | -                     | -             |
| OAML186    | chrX:53438710   | C   | T    | SMC1A  | c.1188+1G>A    |              | splicing                | 0.719          | 185   | No               | -                     | -             |
| OAML241    | chrX:53438710   | C   | T    | SMC1A  | c.1188+1G>A    |              | splicing                | 0.024          | 383   | Yes              | No                    | 0.000         |
| OAML166    | chr10:112340660 | A   | T    | SMC3   | c.430-2A>T     |              | splicing                | 0.395          | 365   | No               | -                     | -             |
| OAML106    | chr10:112340661 | G   | C    | SMC3   | c.430-1G>C     |              | splicing                | 0.060          | 348   | Yes              | No                    | 0.000         |
| OAML231    | chr17:74732935  | 0   | -    | SRSF2  | c.285_308del   | p.95_103del  | nonframeshift deletion  | 0.430          | 454   | Yes              | No                    | 0.000         |
| OAML012    | chr17:74732959  | G   | A    | SRSF2  | c.C284T        | p.P95L       | nonsynonymous SNV       | 0.471          | 474   | Yes              | No                    | 0.000         |
| OAML015    | chr17:74732959  | G   | A    | SRSF2  | c.C284T        | p.P95L       | nonsynonymous SNV       | 0.400          | 474   | Yes              | Yes                   | 0.077         |
| OAML024    | chr17:74732959  | G   | T    | SRSF2  | c.C284A        | p.P95H       | nonsynonymous SNV       | 0.467          | 730   | No               | -                     | -             |
| OAML038    | chr17:74732959  | G   | C    | SRSF2  | c.C284G        | p.P95R       | nonsynonymous SNV       | 0.410          | 424   | Yes              | Yes                   | 0.360         |
| OAML051    | chr17:74732959  | G   | T    | SRSF2  | c.C284A        | p.P95H       | nonsynonymous SNV       | 0.446          | 576   | Yes              | Yes                   | 0.362         |
| OAML063    | Chr17:74732959  | G   | A    | SRSF2  | c.C284T        | p.P95L       | nonsynonymous SNV       | 0.467          | 164   | Yes              | No                    | 0.000         |
| OAML068    | Chr17:74732959  | G   | T    | SRSF2  | c.C284A        | p.P95H       | nonsynonymous SNV       | 0.510          | 153   | Yes              | Yes                   | 0.421         |
| OAML074    | chr17:74732959  | G   | T    | SRSF2  | c.C284A        | p.P95H       | nonsynonymous SNV       | 0.239          | 490   | No               | -                     | -             |
| OAML076    | Chr17:74732959  | G   | T    | SRSF2  | c.C284A        | p.P95H       | nonsynonymous SNV       | 0.480          | 321   | Yes              | Yes                   | 0.319         |
| OAML076    | Chr17:74732959  | G   | T    | SRSF2  | c.C284A        | p.P95H       | nonsynonymous SNV       | 0.480          | 321   | Yes              | Yes                   | 0.319         |
| OAML077    | Chr17:74732959  | G   | T    | SRSF2  | c.C284A        | p.P95H       | nonsynonymous SNV       | 0.454          | 436   | Yes              | No                    | 0.000         |
| OAML088    | chr17:74732959  | G   | T    | SRSF2  | c.C284A        | p.P95H       | nonsynonymous SNV       | 0.171          | 522   | Yes              | Yes                   | 0.224         |
| OAML095    | chr17:74732959  | G   | T    | SRSF2  | c.C284A        | p.P95H       | nonsynonymous SNV       | 0.054          | 466   | Yes              | Yes                   | 0.002         |
| OAML098    | chr17:74732959  | G   | C    | SRSF2  | c.C284G        | p.P95R       | nonsynonymous SNV       | 0.444          | 475   | Yes              | No                    | 0.000         |
| OAML099    | chr17:74732959  | G   | C    | SRSF2  | c.C284G        | p.P95R       | nonsynonymous SNV       | 0.474          | 1145  | Yes              | Yes                   | 0.045         |
| OAML102    | chr17:74732959  | G   | T    | SRSF2  | c.C284A        | p.P95H       | nonsynonymous SNV       | 0.456          | 579   | No               | -                     | -             |
| OAML107    | chr17:74732959  | G   | T    | SRSF2  | c.C284A        | p.P95H       | nonsynonymous SNV       | 0.037          | 461   | No               | -                     | -             |
| OAML124    | chr17:74732959  | G   | C    | SRSF2  | c.C284G        | p.P95R       | nonsynonymous SNV       | 0.461          | 640   | Yes              | No                    | 0.000         |
| OAML127    | chr17:74732959  | G   | T    | SRSF2  | c.C284A        | p.P95H       | nonsynonymous SNV       | 0.479          | 457   | Yes              | Yes                   | 0.423         |
| OAML132    | chr17:74732959  | G   | A    | SRSF2  | c.C284T        | p.P95L       | nonsynonymous SNV       | 0.347          | 619   | Yes              | Yes                   | 0.062         |
| OAML133    | chr17:74732959  | G   | T    | SRSF2  | c.C284A        | p.P95H       | nonsynonymous SNV       | 0.420          | 710   | Yes              | No                    | 0.000         |
| OAML142    | chr17:74732959  | G   | T    | SRSF2  | c.C284A        | p.P95H       | nonsynonymous SNV       | 0.434          | 627   | No               | -                     | -             |
| OAML143    | chr17:74732959  | G   | T    | SRSF2  | c.C284A        | p.P95H       | nonsynonymous SNV       | 0.508          | 437   | No               | -                     | -             |
| OAML145    | chr17:74732959  | G   | A    | SRSF2  | c.C284T        | p.P95L       | nonsynonymous SNV       | 0.316          | 583   | Yes              | Yes                   | 0.025         |
| OAML147    | chr17:74732959  | G   | A    | SRSF2  | c.C284T        | p.P95L       | nonsynonymous SNV       | 0.078          | 424   | Yes              | No                    | 0.000         |
| OAML156    | chr17:74732959  | G   | A    | SRSF2  | c.C284T        | p.P95L       | nonsynonymous SNV       | 0.358          | 369   | Yes              | Yes                   | 0.012         |
| OAML158    | chr17:74732959  | G   | A    | SRSF2  | c.C284T        | p.P95L       | nonsynonymous SNV       | 0.468          | 737   | Yes              | Yes                   | 0.349         |

| subject_id | chrom:pos_start | ref | var | gene      | cdna            | aa           | Result                  | Diagnostic VAF | Depth | Remission Sample | Detected in Remission | Remission VAF |
|------------|-----------------|-----|-----|-----------|-----------------|--------------|-------------------------|----------------|-------|------------------|-----------------------|---------------|
| OAML167    | chr17:74732959  | G   | T   | SRSF2     | c.C284A         | p.P95H       | nonsynonymous SNV       | 0.501          | 399   | No               | .                     | .             |
| OAML173    | chr17:74732959  | G   | A   | SRSF2     | c.C284T         | p.P95L       | nonsynonymous SNV       | 0.524          | 380   | No               | .                     | .             |
| OAML175    | chr17:74732959  | G   | A   | SRSF2     | c.C284T         | p.P95L       | nonsynonymous SNV       | 0.263          | 338   | No               | .                     | .             |
| OAML179    | chr17:74732959  | G   | T   | SRSF2     | c.C284A         | p.P95H       | nonsynonymous SNV       | 0.427          | 379   | Yes              | Yes                   | 0.142         |
| OAML180    | chr17:74732959  | G   | T   | SRSF2     | c.C284A         | p.P95H       | nonsynonymous SNV       | 0.439          | 378   | No               | .                     | .             |
| OAML182    | chr17:74732959  | -   | -   | GGC SRSF2 | c.283_284insGC  | p.P95delinsR | nonframeshift insertion | 0.601          | 630   | No               | .                     | .             |
| OAML188    | chr17:74732959  | G   | T   | SRSF2     | c.C284A         | p.P95H       | nonsynonymous SNV       | 0.500          | 404   | No               | .                     | .             |
| OAML195    | chr17:74732959  | G   | T   | SRSF2     | c.C284A         | p.P95H       | nonsynonymous SNV       | 0.430          | 309   | Yes              | Yes                   | 0.017         |
| OAML201    | chr17:74732959  | G   | A   | SRSF2     | c.C284T         | p.P95L       | nonsynonymous SNV       | 0.430          | 558   | No               | .                     | .             |
| OAML203    | chr17:74732959  | G   | A   | SRSF2     | c.C284T         | p.P95L       | nonsynonymous SNV       | 0.348          | 443   | No               | .                     | .             |
| OAML205    | chr17:74732959  | -   | -   | GGC SRSF2 | c.283_284insGC  | p.P95delinsR | nonframeshift insertion | 0.575          | 690   | No               | .                     | .             |
| OAML210    | chr17:74732959  | G   | C   | SRSF2     | c.C284G         | p.P95R       | nonsynonymous SNV       | 0.214          | 374   | No               | .                     | .             |
| OAML212    | chr17:74732959  | G   | A   | SRSF2     | c.C284T         | p.P95L       | nonsynonymous SNV       | 0.322          | 480   | No               | .                     | .             |
| OAML237    | chr17:74732959  | G   | T   | SRSF2     | c.C284A         | p.P95H       | nonsynonymous SNV       | 0.353          | 455   | Yes              | No                    | 0.000         |
| OAML238    | chr17:74732959  | G   | T   | SRSF2     | c.C284A         | p.P95H       | nonsynonymous SNV       | 0.433          | 476   | Yes              | Yes                   | 0.119         |
| OAML253    | chr17:74732959  | G   | T   | SRSF2     | c.C284A         | p.P95H       | nonsynonymous SNV       | 0.417          | 638   | Yes              | Yes                   | 0.398         |
| OAML266    | chr17:74732959  | G   | T   | SRSF2     | c.C284A         | p.P95H       | nonsynonymous SNV       | 0.446          | 480   | Yes              | No                    | 0.000         |
| OAML274    | chr17:74732959  | G   | T   | SRSF2     | c.C284A         | p.P95H       | nonsynonymous SNV       | 0.368          | 496   | Yes              | Yes                   | 0.176         |
| OAML305    | Chr17:74732959  | G   | T   | SRSF2     | c.C284A         | p.P95H       | nonsynonymous SNV       | 0.281          | 609   | No               | .                     | .             |
| OAML316    | Chr17:74732959  | G   | A   | SRSF2     | c.C284T         | p.P95L       | nonsynonymous SNV       | 0.312          | 857   | Yes              | No                    | 0.000         |
| OAML325    | Chr17:74732959  | G   | C   | SRSF2     | c.C284G         | p.P95R       | nonsynonymous SNV       | 0.497          | 431   | No               | .                     | .             |
| OAML213    | chr17:74732960  | G   | C   | SRSF2     | c.C283G         | p.P95A       | nonsynonymous SNV       | 0.447          | 461   | No               | .                     | .             |
| OAML103    | chr17:74733073  | A   | T   | SRSF2     | c.T170A         | p.F57Y       | nonsynonymous SNV       | 0.453          | 561   | Yes              | Yes                   | 0.143         |
| OAML147    | chr17:74733073  | A   | T   | SRSF2     | c.T170A         | p.F57Y       | nonsynonymous SNV       | 0.027          | 518   | Yes              | No                    | 0.000         |
| OAML145    | chrX:123164932  | T   | -   | STAG2     | c.245delT       | p.M82fs      | frameshift deletion     | 0.024          | 370   | Yes              | Yes                   | 0.001         |
| OAML277    | chrX:123171392  | -   | G   | STAG2     | c.305dupG       | p.W102fs     | frameshift insertion    | 0.841          | 296   | Yes              | No                    | 0.000         |
| OAML253    | chrX:123171416  | C   | T   | STAG2     | c.C328T         | p.R110X      | stopgain                | 0.730          | 215   | Yes              | Yes                   | 0.769         |
| OAML266    | chrX:123171416  | C   | T   | STAG2     | c.C328T         | p.R110X      | stopgain                | 0.465          | 393   | Yes              | Yes                   | 0.001         |
| OAML194    | chrX:123171455  | C   | T   | STAG2     | c.C367T         | p.Q123X      | stopgain                | 0.410          | 178   | Yes              | No                    | 0.000         |
| OAML035    | chrX:123179024  | 0   | -   | STAG2     | c.473_474del    | p.D158fs     | frameshift deletion     | 0.522          | 228   | Yes              | Yes                   | 0.002         |
| OAML213    | chrX:123179028  | T   | -   | STAG2     | c.477delT       | p.Y159fs     | frameshift deletion     | 0.058          | 293   | No               | .                     | .             |
| OAML191    | chrX:123179054  | G   | A   | STAG2     | c.G503A         | p.W168X      | stopgain                | 0.849          | 252   | No               | .                     | .             |
| OAML124    | chrX:123179115  | T   | G   | STAG2     | c.T564G         | p.Y188X      | stopgain                | 0.901          | 364   | Yes              | No                    | 0.000         |
| OAML068    | ChrX:123179197  | C   | T   | STAG2     | c.C646T         | p.R216X      | stopgain                | 0.829          | 76    | Yes              | No                    | 0.000         |
| OAML274    | chrX:123179197  | C   | T   | STAG2     | c.C646T         | p.R216X      | stopgain                | 0.729          | 277   | Yes              | Yes                   | 0.246         |
| OAML110    | chrX:123179201  | -   | T   | STAG2     | c.651dupT       | p.H217fs     | frameshift insertion    | 0.092          | 119   | No               | .                     | .             |
| OAML200    | chrX:123181311  | C   | T   | STAG2     | c.C775T         | p.R259X      | stopgain                | 0.290          | 252   | Yes              | No                    | 0.000         |
| OAML256    | chrX:123181311  | C   | T   | STAG2     | c.C775T         | p.R259X      | stopgain                | 0.286          | 503   | Yes              | Yes                   | 0.005         |
| OAML241    | chrX:123182922  | -   | AT  | STAG2     | c.887_888insAT  | p.R296fs     | frameshift insertion    | 0.780          | 240   | Yes              | No                    | 0.000         |
| OAML144    | chrX:123182927  | C   | -   | STAG2     | c.892delC       | p.R298fs     | frameshift deletion     | 0.347          | 121   | Yes              | No                    | 0.000         |
| OAML224    | chrX:123190037  | C   | G   | STAG2     | c.C1256G        | p.S419X      | stopgain                | 0.908          | 184   | No               | .                     | .             |
| OAML305    | ChrX:123191804  | -   | T   | STAG2     | c.1394dupT      | p.V465fs     | frameshift insertion    | 0.262          | 316   | No               | .                     | .             |
| OAML038    | chrX:123195627  | 0   | -   | STAG2     | c.1541_1544del  | p.T514fs     | frameshift deletion     | 0.247          | 77    | Yes              | No                    | 0.000         |
| OAML188    | chrX:123196822  | 0   | -   | STAG2     | c.1709_1712del  | p.A570fs     | frameshift deletion     | 0.905          | 262   | No               | .                     | .             |
| OAML076    | ChrX:123197782  | -   | A   | STAG2     | c.1907dupA      | p.Y636_H63;  | stopgain                | 0.860          | 179   | Yes              | Yes                   | 0.677         |
| OAML076    | ChrX:123197782  | -   | A   | STAG2     | c.1907dupA      | p.Y636_H63;  | stopgain                | 0.860          | 179   | Yes              | Yes                   | 0.677         |
| OAML271    | chrX:123197803  | -   | AGT | STAG2     | c.1927_1928insA | p.E643fs     | frameshift insertion    | 0.358          | 432   | Yes              | No                    | 0.000         |
| OAML230    | chrX:123199793  | -   | T   | STAG2     | c.2094dupT      | p.H698fs     | frameshift insertion    | 0.142          | 162   | Yes              | No                    | 0.000         |
| OAML132    | chrX:123200026  | 0   | -   | STAG2     | c.2098_2104del  | p.A700fs     | frameshift deletion     | 0.174          | 116   | Yes              | Yes                   | 0.019         |
| OAML054    | chrX:123202507  | G   | A   | STAG2     | c.2358+1G>A     |              | splicing                | 0.560          | 175   | No               | .                     | .             |
| OAML041    | chrX:123210181  | G   | A   | STAG2     | c.2534-1G>A     |              | splicing                | 0.141          | 156   | Yes              | No                    | 0.000         |
| OAML185    | chrX:123210307  | A   | T   | STAG2     | c.A2659T        | p.K887X      | stopgain                | 0.464          | 274   | No               | .                     | .             |
| OAML253    | chrX:123211852  | -   | TCC | STAG2     | c.2719_2720insT | p.T907fs     | frameshift insertion    | 0.035          | 201   | Yes              | No                    | 0.000         |
| OAML088    | chrX:123211879  | -   | CTA | STAG2     | c.2746_2747insC | p.A916fs     | frameshift insertion    | 0.021          | 241   | Yes              | No                    | 0.000         |
| OAML250    | chrX:123215264  | A   | -   | STAG2     | c.2810delA      | p.N937fs     | frameshift deletion     | 0.878          | 262   | Yes              | No                    | 0.000         |
| OAML252    | chrX:123217380  | C   | T   | STAG2     | c.C3034T        | p.R1012X     | stopgain                | 0.917          | 229   | Yes              | Yes                   | 0.036         |
| OAML203    | chrX:123220476  | C   | T   | STAG2     | c.C3133T        | p.R1045X     | stopgain                | 0.346          | 676   | No               | .                     | .             |
| OAML037    | chr17:40359673  | C   | A   | STAT5B    | c.G1980T        | p.L660F      | nonsynonymous SNV       | 0.030          | 495   | Yes              | No                    | 0.000         |
| OAML106    | chr17:40359729  | T   | G   | STAT5B    | c.A1924C        | p.N642H      | nonsynonymous SNV       | 0.055          | 587   | Yes              | No                    | 0.000         |
| OAML168    | chr17:40359729  | T   | G   | STAT5B    | c.A1924C        | p.N642H      | nonsynonymous SNV       | 0.471          | 522   | No               | .                     | .             |
| OAML325    | Chr17:40359729  | T   | G   | STAT5B    | c.A1924C        | p.N642H      | nonsynonymous SNV       | 0.454          | 280   | No               | .                     | .             |
| OAML048    | chr17:30322782  | G   | A   | SUZ12     | c.1794+1G>A     |              | splicing                | 0.289          | 363   | Yes              | No                    | 0.000         |
| OAML189    | chr3:169482460  | G   | A   | TERC      |                 |              | ncRNA_exonic            | 0.484          | 630   | Yes              | Yes                   | .             |
| OAML047    | chr3:169482812  | T   | C   | TERC      |                 |              | ncRNA_exonic            | 0.507          | 751   | Yes              | Yes                   | .             |
| OAML153    | chr5:1280287    | G   | C   | TERT      | c.C1936G        | p.R646G      | nonsynonymous SNV       | 0.514          | 661   | Yes              | Yes                   | 0.468         |
| OAML153    | chr5:1280288    | G   | C   | TERT      | c.C1935G        | p.F645L      | nonsynonymous SNV       | 0.511          | 663   | Yes              | Yes                   | 0.469         |
| OAML173    | chr5:1282548    | T   | C   | TERT      | c.A1765G        | p.I589V      | nonsynonymous SNV       | 0.555          | 409   | No               | .                     | .             |
| OAML103    | chr4:106155511  | C   | T   | TET2      | c.C412T         | p.Q138X      | stopgain                | 0.465          | 959   | Yes              | Yes                   | 0.024         |
| OAML197    | chr4:106155920  | T   | -   | TET2      | c.821delT       | p.I274fs     | frameshift deletion     | 0.460          | 1382  | No               | .                     | .             |
| OAML171    | chr4:106156042  | T   | -   | TET2      | c.943delT       | p.S315fs     | frameshift deletion     | 0.460          | 859   | No               | .                     | .             |
| OAML259    | chr4:106156091  | T   | -   | TET2      | c.992delT       | p.I331fs     | frameshift deletion     | 0.835          | 694   | Yes              | Yes                   | 0.415         |
| OAML263    | chr4:106156158  | 0   | -   | TET2      | c.1059_1060del  | p.C353fs     | frameshift deletion     | 0.304          | 898   | Yes              | No                    | 0.000         |
| OAML148    | chr4:106156160  | C   | -   | TET2      | c.1061delC      | p.S354X      | stopgain                | 0.158          | 1113  | Yes              | Yes                   | 0.070         |
| OAML159    | chr4:106156253  | C   | G   | TET2      | c.C1154G        | p.S385X      | stopgain                | 0.930          | 759   | Yes              | Yes                   | 0.001         |
| OAML219    | chr4:106156360  | G   | -   | TET2      | c.1261delG      | p.E421fs     | frameshift deletion     | 0.247          | 665   | No               | .                     | .             |

| subject_id | chrom.pos_start | ref | var | gene | cdna            | aa        | Result               | Diagnostic VAF | Depth | Remission Sample | Detected in Remission | Remission VAF |
|------------|-----------------|-----|-----|------|-----------------|-----------|----------------------|----------------|-------|------------------|-----------------------|---------------|
| OAML273    | chr4:106156413  | -   | A   | TET2 | c.1315dupA      | p.P438fs  | frameshift insertion | 0.021          | 899   | Yes              | No                    | 0.000         |
| OAML046    | chr4:106156540  | 0   | -   | TET2 | c.1441_1442del  | p.Q481fs  | frameshift deletion  | 0.273          | 963   | Yes              | Yes                   | 0.012         |
| OAML121    | chr4:106156700  | G   | -   | TET2 | c.1601delG      | p.R534fs  | frameshift deletion  | 0.483          | 1154  | Yes              | Yes                   | 0.399         |
| OAML079    | chr4:106156729  | C   | T   | TET2 | c.C1630T        | p.R544X   | stopgain             | 0.026          | 800   | Yes              | Yes                   | 0.033         |
| OAML028    | chr4:106156758  | -   | C   | TET2 | c.1680dupC      | p.V553fs  | frameshift insertion | 0.423          | 1223  | Yes              | Yes                   | 0.020         |
| OAML119    | chr4:106156894  | -   | A   | TET2 | c.1796dupA      | p.Q599fs  | frameshift insertion | 0.905          | 761   | Yes              | Yes                   | 0.672         |
| OAML273    | chr4:106156896  | 0   | -   | TET2 | c.1797_1801del  | p.Q599fs  | frameshift deletion  | 0.037          | 871   | Yes              | No                    | 0.000         |
| OAML097    | chr4:106156915  | 0   | -   | TET2 | c.1816_1817del  | p.T606fs  | frameshift deletion  | 0.407          | 919   | Yes              | Yes                   | 0.044         |
| OAML031    | chr4:106156941  | G   | -   | TET2 | c.1842delG      | p.G614fs  | frameshift deletion  | 0.369          | 889   | Yes              | Yes                   | 0.004         |
| OAML015    | chr4:106157001  | C   | A   | TET2 | c.C1902A        | p.Y634X   | stopgain             | 0.393          | 888   | Yes              | Yes                   | 0.062         |
| OAML213    | chr4:106157008  | G   | T   | TET2 | c.G1909T        | p.E637X   | stopgain             | 0.438          | 975   | No               | -                     | -             |
| OAML148    | chr4:106157074  | C   | T   | TET2 | c.C1975T        | p.Q659X   | stopgain             | 0.144          | 1053  | Yes              | Yes                   | 0.064         |
| OAML177    | chr4:106157352  | 0   | -   | TET2 | c.2253_2256del  | p.K751fs  | frameshift deletion  | 0.391          | 613   | No               | -                     | -             |
| OAML031    | chr4:106157371  | C   | T   | TET2 | c.C2272T        | p.Q758X   | stopgain             | 0.462          | 805   | Yes              | Yes                   | 0.367         |
| OAML120    | chr4:106157375  | C   | -   | TET2 | c.2276delC      | p.T759fs  | frameshift deletion  | 0.023          | 1062  | Yes              | No                    | 0.000         |
| OAML038    | chr4:106157384  | -   | C   | TET2 | c.2286dupC      | p.H762fs  | frameshift insertion | 0.164          | 935   | Yes              | No                    | 0.000         |
| OAML118    | chr4:106157446  | G   | -   | TET2 | c.2347delG      | p.E783fs  | frameshift deletion  | 0.431          | 764   | Yes              | Yes                   | 0.223         |
| OAML012    | chr4:106157527  | C   | T   | TET2 | c.C2428T        | p.Q810X   | stopgain             | 0.480          | 830   | Yes              | Yes                   | 0.012         |
| OAML290    | Chr4:106157542  | A   | T   | TET2 | c.A2443T        | p.R815X   | stopgain             | 0.454          | 295   | Yes              | No                    | 0.000         |
| OAML081    | chr4:106157617  | -   | TAG | TET2 | c.2518_2519insT | p.L840fs  | frameshift insertion | 0.218          | 968   | Yes              | No                    | 0.000         |
| OAML285    | Chr4:106157677  | C   | -   | TET2 | c.2578delC      | p.Q860fs  | frameshift deletion  | 0.331          | 260   | Yes              | No                    | 0.000         |
| OAML013    | chr4:106157755  | C   | T   | TET2 | c.C2656T        | p.Q886X   | stopgain             | 0.286          | 21    | Yes              | No                    | 0.000         |
| OAML121    | chr4:106157887  | G   | -   | TET2 | c.2788delG      | p.V930fs  | frameshift deletion  | 0.466          | 1160  | Yes              | Yes                   | 0.396         |
| OAML273    | chr4:106157983  | C   | T   | TET2 | c.C2884T        | p.Q962X   | stopgain             | 0.447          | 804   | Yes              | Yes                   | 0.008         |
| OAML253    | chr4:106157998  | C   | T   | TET2 | c.C2899T        | p.Q967X   | stopgain             | 0.365          | 877   | Yes              | Yes                   | 0.328         |
| OAML255    | chr4:106158065  | C   | -   | TET2 | c.2968delC      | p.P989fs  | frameshift deletion  | 0.026          | 916   | Yes              | No                    | 0.000         |
| OAML177    | chr4:106158187  | C   | T   | TET2 | c.C3088T        | p.Q1030X  | stopgain             | 0.447          | 710   | No               | -                     | -             |
| OAML025    | chr4:106158252  | -   | A   | TET2 | c.3154dupA      | p.Q1051fs | frameshift insertion | 0.465          | 1142  | Yes              | Yes                   | 0.441         |
| OAML076    | Chr4:106158301  | C   | T   | TET2 | c.C3202T        | p.Q1068X  | stopgain             | 0.440          | 539   | Yes              | Yes                   | 0.308         |
| OAML076    | Chr4:106158301  | C   | T   | TET2 | c.C3202T        | p.Q1068X  | stopgain             | 0.440          | 539   | Yes              | Yes                   | 0.308         |
| OAML141    | chr4:106158503  | G   | A   | TET2 | c.G3404A        | p.C1135Y  | nonsynonymous SNV    | 0.516          | 452   | No               | -                     | -             |
| OAML151    | chr4:106158503  | G   | A   | TET2 | c.G3404A        | p.C1135Y  | nonsynonymous SNV    | 0.399          | 753   | Yes              | No                    | 0.000         |
| OAML179    | chr4:106162495  | G   | C   | TET2 | c.3410-1G>C     |           | splicing             | 0.461          | 256   | Yes              | Yes                   | 0.106         |
| OAML081    | chr4:106162535  | A   | C   | TET2 | c.A3449C        | p.H1150P  | nonsynonymous SNV    | 0.333          | 761   | Yes              | Yes                   | 0.016         |
| OAML116    | chr4:106162587  | G   | A   | TET2 | c.3500+1G>A     |           | splicing             | 0.595          | 630   | Yes              | Yes                   | 0.384         |
| OAML079    | chr4:106163998  | C   | T   | TET2 | c.C3508T        | p.Q1170X  | stopgain             | 0.133          | 467   | Yes              | Yes                   | 0.005         |
| OAML015    | chr4:106164061  | C   | T   | TET2 | c.C3571T        | p.Q1191X  | stopgain             | 0.372          | 578   | Yes              | Yes                   | 0.035         |
| OAML275    | chr4:106164085  | G   | A   | TET2 | c.3594+1G>A     |           | splicing             | 0.460          | 454   | Yes              | Yes                   | 0.257         |
| OAML329    | Chr4:106164763  | T   | C   | TET2 | c.T3631C        | p.C1211R  | nonsynonymous SNV    | 0.464          | 336   | No               | -                     | -             |
| OAML290    | Chr4:106164861  | 0   | -   | TET2 | c.3729_3730del  | p.K1243fs | frameshift deletion  | 0.422          | 237   | Yes              | No                    | 0.000         |
| OAML213    | chr4:106164913  | C   | T   | TET2 | c.C3781T        | p.R1261C  | nonsynonymous SNV    | 0.028          | 534   | No               | -                     | -             |
| OAML028    | chr4:106164916  | C   | T   | TET2 | c.C3784T        | p.R1262W  | nonsynonymous SNV    | 0.427          | 592   | Yes              | Yes                   | 0.015         |
| OAML275    | chr4:106180774  | 0   | -   | TET2 | c.3804_3814del  | p.E1268fs | frameshift deletion  | 0.320          | 577   | Yes              | Yes                   | 0.011         |
| OAML173    | chr4:106180778  | G   | T   | TET2 | c.G3806T        | p.R1269I  | nonsynonymous SNV    | 0.464          | 617   | No               | -                     | -             |
| OAML103    | chr4:106180783  | T   | G   | TET2 | c.T3811G        | p.C1271G  | nonsynonymous SNV    | 0.435          | 883   | Yes              | Yes                   | 0.172         |
| OAML174    | chr4:106180790  | G   | C   | TET2 | c.G3818C        | p.C1273S  | nonsynonymous SNV    | 0.977          | 835   | No               | -                     | -             |
| OAML038    | chr4:106180792  | C   | T   | TET2 | c.C3820T        | p.Q1274X  | stopgain             | 0.207          | 932   | Yes              | No                    | 0.000         |
| OAML329    | Chr4:106180899  | T   | G   | TET2 | c.T3927G        | p.F1309L  | nonsynonymous SNV    | 0.453          | 450   | No               | -                     | -             |
| OAML060    | chr4:106180904  | T   | C   | TET2 | c.T3932C        | p.L1311P  | nonsynonymous SNV    | 0.113          | 855   | Yes              | Yes                   | 0.041         |
| OAML001    | chr4:106180925  | A   | C   | TET2 | c.A3953C        | p.E1318A  | nonsynonymous SNV    | 0.458          | 295   | Yes              | Yes                   | 0.529         |
| OAML249    | chr4:106182902  | 0   | -   | TET2 | c.3955_3973del  | p.E1319fs | frameshift deletion  | 0.655          | 231   | Yes              | Yes                   | 0.116         |
| OAML317    | Chr4:106182968  | 0   | -   | TET2 | c.4007_4008del  | p.T1336fs | frameshift deletion  | 0.170          | 651   | No               | -                     | -             |
| OAML179    | chr4:106190766  | G   | T   | TET2 | c.4045-1G>T     |           | splicing             | 0.429          | 464   | Yes              | Yes                   | 0.106         |
| OAML168    | chr4:106190795  | G   | T   | TET2 | c.G4073T        | p.C1358F  | nonsynonymous SNV    | 0.948          | 676   | No               | -                     | -             |
| OAML001    | chr4:106190822  | C   | G   | TET2 | c.C4100G        | p.P1367R  | nonsynonymous SNV    | 0.458          | 708   | Yes              | Yes                   | 0.432         |
| OAML173    | chr4:106190882  | A   | G   | TET2 | c.A4160G        | p.N1387S  | nonsynonymous SNV    | 0.058          | 604   | No               | -                     | -             |
| OAML171    | chr4:106190887  | C   | T   | TET2 | c.C4165T        | p.Q1389X  | stopgain             | 0.442          | 568   | No               | -                     | -             |
| OAML097    | chr4:106190896  | A   | C   | TET2 | c.A4174C        | p.S1392R  | nonsynonymous SNV    | 0.471          | 624   | Yes              | Yes                   | 0.001         |
| OAML118    | chr4:106190900  | C   | T   | TET2 | c.C4178T        | p.T1393I  | nonsynonymous SNV    | 0.450          | 585   | Yes              | Yes                   | 0.266         |
| OAML116    | chr4:106193779  | A   | T   | TET2 | c.A4241T        | p.Q1414L  | nonsynonymous SNV    | 0.348          | 940   | Yes              | Yes                   | 0.435         |
| OAML182    | chr4:106193785  | A   | -   | TET2 | c.4247delA      | p.H1410fs | frameshift deletion  | 0.328          | 305   | No               | -                     | -             |
| OAML278    | chr4:106193833  | -   | G   | TET2 | c.4296dupG      | p.V1432fs | frameshift insertion | 0.949          | 508   | Yes              | Yes                   | 0.247         |
| OAML138    | chr4:106193892  | C   | T   | TET2 | c.C4354T        | p.R1452X  | stopgain             | 0.023          | 875   | Yes              | No                    | 0.000         |
| OAML191    | chr4:106193931  | C   | T   | TET2 | c.C4393T        | p.R1465X  | stopgain             | 0.464          | 528   | No               | -                     | -             |
| OAML221    | chr4:106193931  | C   | T   | TET2 | c.C4393T        | p.R1465X  | stopgain             | 0.198          | 489   | No               | -                     | -             |
| OAML243    | chr4:106193931  | C   | T   | TET2 | c.C4393T        | p.R1465X  | stopgain             | 0.474          | 761   | Yes              | Yes                   | 0.445         |
| OAML060    | chr4:106194057  | C   | -   | TET2 | c.4519delC      | p.Q1507fs | frameshift deletion  | 0.067          | 464   | Yes              | Yes                   | 0.008         |
| OAML211    | chr4:106196349  | 0   | -   | TET2 | c.4682_4683del  | p.S1561fs | frameshift deletion  | 0.455          | 1049  | No               | -                     | -             |
| OAML191    | chr4:106196753  | T   | -   | TET2 | c.5086delT      | p.Y1696fs | frameshift deletion  | 0.390          | 1049  | No               | -                     | -             |
| OAML254    | chr4:106196907  | 0   | -   | TET2 | c.5240_5253del  | p.P1747fs | frameshift deletion  | 0.391          | 877   | Yes              | Yes                   | 0.070         |
| OAML238    | chr4:106197038  | -   | C   | TET2 | c.5372dupC      | p.S1791fs | frameshift insertion | 0.396          | 1001  | Yes              | Yes                   | 0.095         |
| OAML074    | chr4:106197273  | G   | T   | TET2 | c.G5606T        | p.G1869V  | nonsynonymous SNV    | 0.233          | 935   | No               | -                     | -             |
| OAML173    | chr4:106197285  | T   | C   | TET2 | c.T5618C        | p.I1873T  | nonsynonymous SNV    | 0.480          | 759   | No               | -                     | -             |
| OAML227    | chr4:106197285  | T   | C   | TET2 | c.T5618C        | p.I1873T  | nonsynonymous SNV    | 0.452          | 644   | No               | -                     | -             |
| OAML282    | Chr4:106197285  | T   | C   | TET2 | c.T5618C        | p.I1873T  | nonsynonymous SNV    | 0.241          | 398   | Yes              | Yes                   | 0.007         |

| subject_id | chrom:pos_start | ref | var  | gene  | cdna            | aa          | Result               | Diagnostic VAF | Depth | Remission Sample | Detected in Remission | Remission VAF |
|------------|-----------------|-----|------|-------|-----------------|-------------|----------------------|----------------|-------|------------------|-----------------------|---------------|
| OAML322    | Chr4:106197285  | T   | C    | TET2  | c.T5618C        | p.I1873T    | nonsynonymous SNV    | 0.242          | 1041  | No               | .                     | .             |
| OAML100    | chr4:106197317  | A   | -    | TET2  | c.5650delA      | p.T1884fs   | frameshift deletion  | 0.249          | 1046  | No               | .                     | .             |
| OAML138    | chr4:106197348  | C   | A    | TET2  | c.C5681A        | p.P1894H    | nonsynonymous SNV    | 0.466          | 1137  | Yes              | Yes                   | 0.214         |
| OAML266    | chr4:106197552  | C   | T    | TET2  | c.C5885T        | p.P1962L    | nonsynonymous SNV    | 0.503          | 753   | Yes              | Yes                   | 0.464         |
| OAML220    | chr17:7576541   | G   | A    | TP53  | c.C560T         | p.S187L     | nonsynonymous SNV    | 0.488          | 252   | No               | .                     | .             |
| OAML240    | chr17:7577049   | 0   | -    | TP53  | c.861_889del    | p.E287fs    | frameshift deletion  | 0.022          | 815   | Yes              | No                    | 0.000         |
| OAML212    | chr17:7577087   | G   | A    | TP53  | c.C851T         | p.T284I     | nonsynonymous SNV    | 0.476          | 777   | No               | .                     | .             |
| OAML036    | chr17:7577114   | C   | A    | TP53  | c.G824T         | p.C275F     | nonsynonymous SNV    | 0.203          | 645   | Yes              | Yes                   | 0.049         |
| OAML239    | chr17:7577114   | C   | T    | TP53  | c.G824A         | p.C275Y     | nonsynonymous SNV    | 0.433          | 367   | Yes              | Yes                   | 0.262         |
| OAML132    | chr17:7577120   | C   | T    | TP53  | c.G818A         | p.R273H     | nonsynonymous SNV    | 0.761          | 860   | Yes              | Yes                   | 0.764         |
| OAML171    | chr17:7577120   | C   | T    | TP53  | c.G818A         | p.R273H     | nonsynonymous SNV    | 0.473          | 778   | No               | .                     | .             |
| OAML283    | Chr17:7577120   | C   | T    | TP53  | c.G818A         | p.R273H     | nonsynonymous SNV    | 0.211          | 190   | Yes              | Yes                   | 0.004         |
| OAML288    | Chr17:7577120   | C   | T    | TP53  | c.G818A         | p.R273H     | nonsynonymous SNV    | 0.301          | 219   | Yes              | Yes                   | 0.003         |
| OAML137    | chr17:7577144   | A   | G    | TP53  | c.T794C         | p.L265P     | nonsynonymous SNV    | 0.811          | 555   | Yes              | Yes                   | 0.131         |
| OAML317    | Chr17:7577511   | A   | G    | TP53  | c.T770C         | p.L257P     | nonsynonymous SNV    | 0.037          | 833   | No               | .                     | .             |
| OAML317    | Chr17:7577520   | A   | T    | TP53  | c.T761A         | p.I254N     | nonsynonymous SNV    | 0.065          | 784   | No               | .                     | .             |
| OAML090    | chr17:7577556   | C   | T    | TP53  | c.G725A         | p.C242Y     | nonsynonymous SNV    | 0.300          | 534   | Yes              | No                    | 0.000         |
| OAML064    | chr17:7577559   | G   | A    | TP53  | c.C722T         | p.S241F     | nonsynonymous SNV    | 0.377          | 576   | Yes              | Yes                   | 0.039         |
| OAML126    | chr17:7577559   | G   | T    | TP53  | c.C722A         | p.S241Y     | nonsynonymous SNV    | 0.410          | 486   | Yes              | No                    | 0.000         |
| OAML242    | chr17:7577563   | T   | C    | TP53  | c.A718G         | p.S240G     | nonsynonymous SNV    | 0.784          | 342   | Yes              | Yes                   | 0.231         |
| OAML134    | chr17:7577566   | -   | A    | TP53  | c.714dupT       | p.N239_S240 | stopgain             | 0.474          | 591   | Yes              | Yes                   | 0.188         |
| OAML207    | chr17:7577568   | C   | A    | TP53  | c.G713T         | p.C238F     | nonsynonymous SNV    | 0.028          | 614   | No               | .                     | .             |
| OAML062    | chr17:7577580   | T   | C    | TP53  | c.A701G         | p.Y234C     | nonsynonymous SNV    | 0.421          | 496   | Yes              | Yes                   | 0.002         |
| OAML066    | chr17:7577580   | T   | C    | TP53  | c.A701G         | p.Y234C     | nonsynonymous SNV    | 0.825          | 718   | Yes              | Yes                   | 0.020         |
| OAML009    | chr17:7577587   | T   | A    | TP53  | c.A694T         | p.I232F     | nonsynonymous SNV    | 0.734          | 488   | Yes              | Yes                   | 0.002         |
| OAML052    | chr17:7578190   | T   | C    | TP53  | c.A659G         | p.Y220C     | nonsynonymous SNV    | 0.410          | 603   | Yes              | Yes                   | 0.036         |
| OAML287    | Chr17:7578211   | C   | A    | TP53  | c.G638T         | p.R213L     | nonsynonymous SNV    | 0.168          | 435   | Yes              | Yes                   | 0.001         |
| OAML164    | chr17:7578263   | G   | A    | TP53  | c.C586T         | p.R196X     | stopgain             | 0.312          | 413   | No               | .                     | .             |
| OAML013    | chr17:7578382   | G   | C    | TP53  | c.C548G         | p.S183X     | stopgain             | 0.333          | 18    | Yes              | Yes                   | 0.834         |
| OAML052    | chr17:7578406   | C   | T    | TP53  | c.G524A         | p.R175H     | nonsynonymous SNV    | 0.417          | 743   | Yes              | Yes                   | 0.038         |
| OAML100    | chr17:7578428   | G   | -    | TP53  | c.502delC       | p.H168fs    | frameshift deletion  | 0.381          | 766   | No               | .                     | .             |
| OAML317    | Chr17:7578443   | A   | G    | TP53  | c.T487C         | p.Y163H     | nonsynonymous SNV    | 0.102          | 1006  | No               | .                     | .             |
| OAML317    | Chr17:7578460   | A   | C    | TP53  | c.T470G         | p.V157G     | nonsynonymous SNV    | 0.139          | 917   | No               | .                     | .             |
| OAML239    | chr17:7578465   | 0   | -    | TP53  | c.461_465del    | p.G154fs    | frameshift deletion  | 0.343          | 344   | Yes              | No                    | 0.000         |
| OAML047    | chr17:7578478   | G   | T    | TP53  | c.C452A         | p.P151H     | nonsynonymous SNV    | 0.237          | 812   | Yes              | Yes                   | 0.021         |
| OAML109    | chr17:7578479   | G   | C    | TP53  | c.C451G         | p.P151A     | nonsynonymous SNV    | 0.055          | 1000  | No               | .                     | .             |
| OAML041    | chr17:7578508   | C   | T    | TP53  | c.G422A         | p.C141Y     | nonsynonymous SNV    | 0.122          | 517   | Yes              | No                    | 0.000         |
| OAML136    | chr17:7578532   | A   | G    | TP53  | c.T398C         | p.M133T     | nonsynonymous SNV    | 0.063          | 718   | Yes              | No                    | 0.000         |
| OAML092    | chr17:7578535   | T   | C    | TP53  | c.A395G         | p.K132R     | nonsynonymous SNV    | 0.064          | 701   | No               | .                     | .             |
| OAML069    | Chr17:7578553   | T   | G    | TP53  | c.A377C         | p.Y126S     | nonsynonymous SNV    | 0.927          | 68    | Yes              | Yes                   | 0.095         |
| OAML064    | chr17:7578555   | C   | T    | TP53  | c.259-1G>A      |             | splicing             | 0.049          | 567   | Yes              | Yes                   | 0.135         |
| OAML131    | chr17:7578556   | T   | C    | TP53  | c.259-2A>G      |             | splicing             | 0.858          | 507   | Yes              | Yes                   | 0.263         |
| OAML054    | chr17:7579358   | C   | T    | TP53  | c.G329A         | p.R110H     | nonsynonymous SNV    | 0.463          | 583   | No               | .                     | .             |
| OAML030    | Chr21:44514777  | T   | G    | U2AF1 | c.A470C         | p.Q157P     | nonsynonymous SNV    | 0.421          | 394   | No               | .                     | .             |
| OAML169    | chr21:44514777  | T   | G    | U2AF1 | c.A470C         | p.Q157P     | nonsynonymous SNV    | 0.452          | 578   | No               | .                     | .             |
| OAML178    | chr21:44514777  | T   | G    | U2AF1 | c.A470C         | p.Q157P     | nonsynonymous SNV    | 0.337          | 680   | No               | .                     | .             |
| OAML247    | chr21:44514777  | T   | G    | U2AF1 | c.A470C         | p.Q157P     | nonsynonymous SNV    | 0.326          | 899   | Yes              | No                    | 0.000         |
| OAML264    | chr21:44514777  | T   | C    | U2AF1 | c.A470C         | p.Q157R     | nonsynonymous SNV    | 0.355          | 726   | Yes              | Yes                   | 0.019         |
| OAML322    | Chr21:44514777  | T   | G    | U2AF1 | c.A470C         | p.Q157P     | nonsynonymous SNV    | 0.265          | 1040  | No               | .                     | .             |
| OAML023    | chr21:44524456  | G   | A    | U2AF1 | c.C101T         | p.S34F      | nonsynonymous SNV    | 0.417          | 612   | Yes              | Yes                   | 0.343         |
| OAML039    | chr21:44524456  | G   | A    | U2AF1 | c.C101T         | p.S34F      | nonsynonymous SNV    | 0.121          | 587   | Yes              | Yes                   | 0.133         |
| OAML042    | chr21:44524456  | G   | A    | U2AF1 | c.C101T         | p.S34F      | nonsynonymous SNV    | 0.291          | 539   | Yes              | Yes                   | 0.001         |
| OAML054    | chr21:44524456  | G   | A    | U2AF1 | c.C101T         | p.S34F      | nonsynonymous SNV    | 0.304          | 483   | No               | .                     | .             |
| OAML067    | Chr21:44524456  | G   | A    | U2AF1 | c.C101T         | p.S34F      | nonsynonymous SNV    | 0.486          | 107   | Yes              | Yes                   | 0.017         |
| OAML117    | chr21:44524456  | G   | A    | U2AF1 | c.C101T         | p.S34F      | nonsynonymous SNV    | 0.380          | 637   | Yes              | Yes                   | 0.022         |
| OAML153    | chr21:44524456  | G   | A    | U2AF1 | c.C101T         | p.S34F      | nonsynonymous SNV    | 0.492          | 463   | Yes              | Yes                   | 0.315         |
| OAML176    | chr21:44524456  | G   | A    | U2AF1 | c.C101T         | p.S34F      | nonsynonymous SNV    | 0.432          | 472   | No               | .                     | .             |
| OAML204    | chr21:44524456  | G   | A    | U2AF1 | c.C101T         | p.S34F      | nonsynonymous SNV    | 0.234          | 410   | Yes              | Yes                   | 0.199         |
| OAML228    | chr21:44524456  | G   | A    | U2AF1 | c.C101T         | p.S34F      | nonsynonymous SNV    | 0.455          | 288   | No               | .                     | .             |
| OAML249    | chr21:44524456  | G   | A    | U2AF1 | c.C101T         | p.S34F      | nonsynonymous SNV    | 0.434          | 465   | Yes              | Yes                   | 0.439         |
| OAML251    | chr21:44524456  | G   | A    | U2AF1 | c.C101T         | p.S34F      | nonsynonymous SNV    | 0.439          | 529   | Yes              | Yes                   | 0.061         |
| OAML264    | chr21:44524456  | G   | A    | U2AF1 | c.C101T         | p.S34F      | nonsynonymous SNV    | 0.346          | 480   | Yes              | Yes                   | 0.027         |
| OAML271    | chr21:44524456  | G   | A    | U2AF1 | c.C101T         | p.S34F      | nonsynonymous SNV    | 0.449          | 534   | Yes              | No                    | 0.000         |
| OAML280    | chr21:44524456  | G   | A    | U2AF1 | c.C101T         | p.S34F      | nonsynonymous SNV    | 0.435          | 545   | Yes              | Yes                   | 0.185         |
| OAML285    | Chr21:44524456  | G   | A    | U2AF1 | c.C101T         | p.S34F      | nonsynonymous SNV    | 0.293          | 99    | Yes              | No                    | 0.000         |
| OAML313    | Chr21:44524456  | G   | A    | U2AF1 | c.C101T         | p.S34F      | nonsynonymous SNV    | 0.225          | 546   | No               | .                     | .             |
| OAML211    | chr11:32413556  | T   | C    | WT1   | c.A1394G        | p.H465R     | nonsynonymous SNV    | 0.026          | 643   | No               | .                     | .             |
| OAML235    | chr11:32413560  | C   | T    | WT1   | c.G1390A        | p.D464N     | nonsynonymous SNV    | 0.468          | 502   | Yes              | No                    | 0.000         |
| OAML183    | chr11:32413584  | A   | C    | WT1   | c.T1366G        | p.C456G     | nonsynonymous SNV    | 0.092          | 492   | No               | .                     | .             |
| OAML183    | chr11:32414250  | C   | G    | WT1   | c.G1301C        | p.R434P     | nonsynonymous SNV    | 0.340          | 592   | No               | .                     | .             |
| OAML058    | chr11:32417907  | -   | CCG  | WT1   | c.1144_1145insT | p.A382fs    | frameshift insertion | 0.199          | 956   | Yes              | No                    | 0.000         |
| OAML061    | chr11:32417907  | -   | C    | WT1   | c.1144dupG      | p.A382fs    | frameshift insertion | 0.020          | 486   | Yes              | Yes                   | 0.003         |
| OAML245    | chr11:32417907  | G   | -    | WT1   | c.1145delC      | p.A382fs    | frameshift deletion  | 0.481          | 898   | Yes              | No                    | 0.000         |
| OAML093    | chr11:32417909  | -   | GACI | WT1   | c.1142_1143insT | p.S381fs    | frameshift insertion | 0.246          | 1276  | Yes              | No                    | 0.000         |
| OAML262    | chr11:32417909  | -   | GACI | WT1   | c.1142_1143insC | p.S381fs    | frameshift insertion | 0.306          | 788   | Yes              | No                    | 0.000         |

| subject_id | chrom:pos_start | ref | var | gene  | cdna            | aa          | Result               | Diagnostic VAF | Depth | Remission Sample | Detected in Remission | Remission VAF |
|------------|-----------------|-----|-----|-------|-----------------|-------------|----------------------|----------------|-------|------------------|-----------------------|---------------|
| OAML267    | chr11:32417909  | -   | GAC | WT1   | c.1142_1143insT | p.S381fs    | frameshift insertion | 0.136          | 352   | Yes              | No                    | 0.000         |
| OAML018    | chr11:32417911  | -   | C   | WT1   | c.1140dupG      | p.S381fs    | frameshift insertion | 0.156          | 1104  | Yes              | Yes                   | 0.006         |
| OAML085    | chr11:32417911  | -   | CC  | WT1   | c.1140_1141insC | p.S381fs    | frameshift insertion | 0.275          | 1053  | Yes              | No                    | 0.000         |
| OAML106    | chr11:32417923  | -   | AGG | WT1   | c.1128_1129insC | p.T377fs    | frameshift insertion | 0.043          | 865   | Yes              | No                    | 0.000         |
| OAML233    | chr11:32417923  | -   | ACT | WT1   | c.1128_1129insC | p.T377_L378 | stopgain             | 0.154          | 494   | Yes              | No                    | 0.000         |
| OAML261    | chr11:32417924  | C   | -   | WT1   | c.1128delG      | p.P376fs    | frameshift deletion  | 0.343          | 792   | Yes              | No                    | 0.000         |
| OAML194    | chr11:32417941  | -   | A   | WT1   | c.1110dupT      | p.V371fs    | frameshift insertion | 0.118          | 491   | Yes              | No                    | 0.000         |
| OAML206    | chr11:32417941  | -   | A   | WT1   | c.1110dupT      | p.V371fs    | frameshift insertion | 0.226          | 708   | No               | -                     | -             |
| OAML087    | chr11:32417947  | G   | A   | WT1   | c.C1105T        | p.R369X     | stopgain             | 0.235          | 1130  | Yes              | No                    | 0.000         |
| OAML192    | chr11:32417947  | G   | A   | WT1   | c.C1105T        | p.R369X     | stopgain             | 0.099          | 629   | Yes              | Yes                   | 0.001         |
| OAML236    | chr11:32456245  | C   | A   | WT1   | c.646+1G>T      |             | splicing             | 0.099          | 513   | Yes              | No                    | 0.000         |
| OAML117    | chr11:32456251  | -   | AAG | WT1   | c.640_641insTT  | (p.N214fs)  | frameshift insertion | 0.362          | 594   | Yes              | No                    | 0.000         |
| OAML214    | chr11:32456318  | G   | A   | WT1   | c.C574T         | p.Q192X     | stopgain             | 0.431          | 735   | No               | -                     | -             |
| OAML317    | ChrX:15838328   | A   | C   | ZRSR2 | c.828-2A>C      |             | splicing             | 0.181          | 365   | No               | -                     | -             |
| OAML120    | chrX:15840871   | C   | -   | ZRSR2 | c.955delC       | p.Q319fs    | frameshift deletion  | 0.108          | 370   | Yes              | No                    | 0.000         |

Table S6. Univariable molecular associations with outcomes

|                                 | LFS  |           |         | Relapse |           |         | NRM  |           |         |
|---------------------------------|------|-----------|---------|---------|-----------|---------|------|-----------|---------|
|                                 | HR   | 95% CI    | P value | sHR     | 95% CI    | P value | sHR  | 95% CI    | P value |
| <i>NPM1+</i> , <i>FLT3-ITD-</i> | 0.56 | 0.37-0.81 | 0.002   | 0.56    | 0.31-0.91 | 0.02    | 0.75 | 0.38-1.33 | 0.29    |
| <i>DNMT3A</i>                   | 0.73 | 0.51-1.02 | 0.056   | 0.68    | 0.44-1.04 | 0.068   | 0.94 | 0.55-1.53 | 0.78    |
| <i>DDX41</i>                    | 0.55 | 0.25-0.95 | 0.036   | 0.23    | 0-0.68    | 0.008   | 1.36 | 0.46-2.55 | 0.44    |
| <i>TP53</i>                     | 3.36 | 2.32-5.23 | <0.001  | 5.6     | 3.52-9.17 | <0.001  | 0.28 | 0-0.73    | 0.002   |
| <i>JAK2</i>                     | 2.66 | 1.88-4.08 | <0.001  | 1.62    | 0.6-3.25  | 0.276   | 2.23 | 0.58-5.6  | 0.18    |
| <i>FLT3-ITD+</i> , <i>NPM1-</i> | 2.22 | 1.49-3.41 | <0.001  | 2.28    | 1.18-3.88 | 0.012   | 1.07 | 0.38-2.25 | 0.86    |
| <i>KRAS</i>                     | 2.00 | 1.36-2.95 | 0.004   | 1.3     | 0.54-2.61 | 0.546   | 2.25 | 1.07-4.17 | 0.034   |

HR: hazard ratio from Cox proportional hazards model; sHR: subdistribution hazard ratio from Fine and Gray model.



Table S7. Univariable non-genetic associations with leukemia-free survival

|                                     | HR   | 95% CI    | P value |
|-------------------------------------|------|-----------|---------|
| Age ≥ 65 at transplant              | 1.3  | 0.96-1.77 | 0.09    |
| Adverse cytogenetics, not monosomal | 1.7  | 1.1-2.6   | 0.013   |
| Adverse, monosomal                  | 4.4  | 2.9-6.8   | <0.001  |
| sAML                                | 1.77 | 1.31-2.38 | 0.0002  |
| Prior HMA                           | 1.68 | 1.12-2.51 | 0.012   |
| Non-intensive induction             | 1.56 | 1.09-2.24 | 0.016   |
| Consolidation prior to transplant   | 0.7  | 0.52-0.94 | 0.016   |
| CRi                                 | 1.83 | 1.32-2.54 | 0.0003  |
| WBC < 2k at transplant              | 1.67 | 1.18-2.35 | 0.0034  |
| HCT-CI ≥ 3                          | 1.8  | 1.3-2.7   | 0.002   |

Table S8. Score assigned based on hazard ratio

For each variable in the final model for LFS, scores were assigned based on the hazard ratio for death or relapse. Details are in the supplemental methods.

| HR          | Score |
|-------------|-------|
| 1.00 - 1.50 | 0.5   |
| 1.51 - 2.00 | 1     |
| 2.01 - 2.50 | 1.5   |
| >2.5        | 2     |

Table S9. Cox frailty model for LFS incorporating both clinical and genetic factors

Five variables retained significance in a multivariable Cox model for LFS. The score assigned for each variable level is reported in the final column of the table. Additional details are in the supplemental methods.

|                |                        | HR   | 95% CI    | Score Assigned |
|----------------|------------------------|------|-----------|----------------|
| Cytogenetics   | Favorable/Intermediate | Ref  |           | 0              |
|                | Adverse, not monosomal | 1.56 | 0.93-2.59 | 1              |
|                | Adverse, monosomal     | 2.32 | 1.37-3.97 | 1.5            |
| HCT-CI         | 0-2                    | Ref  |           | 0              |
|                | ≥ 3                    | 1.39 | 1.01-1.95 | 0.5            |
| CR             | CR                     | Ref  |           | 0              |
|                | CRi                    | 1.49 | 1.05-2.16 | 0.5            |
| sAML           | No                     | Ref  |           | 0              |
|                | Yes                    | 1.54 | 1.12-2.14 | 1              |
| Molecular risk | Favorable              | Ref  |           | 0              |
|                | Intermediate           | 1.31 | 0.88-2.00 | 0.5            |
|                | High                   | 2.90 | 1.85-4.64 | 2              |

Table S10. Non-genetic associations with relapse and NRM

Shown are the associations with relapse and NRM for the four variables other than molecular risk that are included in the final model.

| Variable     |                        | Relapse |             |         | NRM  |           |         |
|--------------|------------------------|---------|-------------|---------|------|-----------|---------|
|              |                        | sHR     | 95% CI      | P value | sHR  | 95% CI    | P-value |
| Cytogenetics | Favorable/Intermediate | Ref     |             |         |      |           |         |
|              | Adverse, not monosomal | 1.54    | 0.87-2.73   | 0.13    | 1.24 | 0.65-2.37 | 0.52    |
|              | Adverse, monosomal     | 4.37    | 2.65-7.21   | <0.0001 | 0.87 | 0.37-2.04 | 0.75    |
| HCT-CI       | 0-2                    | Ref     |             |         | Ref  |           |         |
|              | ≥ 3                    | 0.98    | 0.67 – 1.44 | 0.93    | 2.38 | 1.50-3.78 | 0.0002  |
| CR           | CR                     | Ref     |             |         | Ref  |           |         |
|              | CRi                    | 1.95    | 1.30 – 2.90 | 0.0011  | 1.04 | 0.60-1.78 | 0.89    |
| sAML         | No                     | Ref     |             |         | Ref  |           |         |
|              | Yes                    | 1.58    | 1.07 – 2.33 | 0.0207  | 1.46 | 0.91-2.33 | 0.11    |

sHR: subdistribution hazard ratio from Fine and Gray model.

Table S11. Assignment of prognostic groups based on score

Shown are the hazard ratios for death or relapse based on total scores for all 5 variables in the model, with corresponding prognostic groups labeled in the final column.

| Sum score | HR    | 95% CI     | Prognostic Group |
|-----------|-------|------------|------------------|
| 0         | Ref   |            | Low              |
| 0.5       | 2.88  | 1.33-8.46  | Int              |
| 1         | 3.39  | 1.5-9.96   |                  |
| 1.5       | 6.23  | 2.58-19.92 | High             |
| 2         | 4.16  | 1.83-12.51 |                  |
| 2.5       | 8.70  | 3.86-26.19 | Very High        |
| 3         | 10.07 | 3.32-38.93 |                  |
| 3.5       | 21.84 | 9.21-74.02 |                  |
| 4         | 21.98 | 9.92-65.78 |                  |

Table S12. LFS, OS, Relapse, NRM for baseline prognostic groups

Shown are the hazard ratios (HR) for leukemia-free survival (LFS), and overall survival (OS) from Cox proportional hazards models and subdistribution hazard ratios (sHR) for non-relapse mortality (NRM) and relapse from Fine and Gray models for the four tiers of overall risk in the final model.

|        | N   | LFS  |          |         | OS   |          |         | NRM  |           |         | Relapse |          |         |
|--------|-----|------|----------|---------|------|----------|---------|------|-----------|---------|---------|----------|---------|
|        |     | HR   | 95% CI   | p-value | HR   | 95% CI   | p-value | HR   | 95% CI    | p-value | HR      | 95% CI   | p-value |
| Low    | 35  | Ref  |          |         | Ref  |          |         | Ref  |           |         | Ref     |          |         |
| Int    | 113 | 3.7  | 1.8-11.3 | 0.0004  | 3.6  | 1.7-10.9 | 0.0006  | 11.5 | 2.7-80.8  | 0.02    | 1.7     | 0.8-6.4  | 0.17    |
| High   | 71  | 5.6  | 2.6-17.7 | <0.0001 | 5.4  | 2.5-16.8 | <0.0001 | 15.7 | 3.6-110.2 | 0.0095  | 2.3     | 1.0-8.5  | 0.037   |
| V high | 74  | 13.4 | 6.3-42.2 | <0.0001 | 12.7 | 5.9-40.3 | <0.0001 | 12.5 | 2.9-87.7  | 0.018   | 6.4     | 3.0-22.9 | <0.0001 |

Table S13. Outcomes 3 years after transplant

Shown are the 3-year rates of leukemia-free survival (LFS), overall survival (OS), non-relapse mortality (NRM), and relapse for the four tiers of overall risk in the final model. The Kaplan-Meier method was used to estimate LFS and OS and log-rank test was used for group comparison of LFS and OS. Cumulative incidence (CI) of NRM and relapse were estimated in the competing risks framework treating each event as a competing event. Gray test was used for group comparison of CI (cumulative incidence) of NRM and relapse.

|              | N   | LFS (95% CI) | OS (95% CI)  | CI NRM (95% CI) | CI Relapse (95% CI) |
|--------------|-----|--------------|--------------|-----------------|---------------------|
| Low          | 35  | 86% (69, 94) | 86% (69, 94) | 2.9% (0.2, 13)  | 11% (3.5, 24)       |
| Intermediate | 113 | 54% (44, 63) | 58% (48, 67) | 20% (13, 28)    | 26% (18, 35)        |
| High         | 71  | 35% (23, 47) | 35% (23, 47) | 32% (21, 43)    | 33% (22, 45)        |
| Very high    | 74  | 9% (4, 17)   | 9% (4, 17)   | 26% (16, 36)    | 65% (53, 75)        |
| p-value      |     | <0.0001      | <0.0001      | 0.006           | <0.0001             |

Table S14. Treatment-Emergent Mutations

| subject_id | chrom | pos_start | ref | var | gene   | cdna         | aa        | Result               | VAF   | Depth |
|------------|-------|-----------|-----|-----|--------|--------------|-----------|----------------------|-------|-------|
| OAML007    | 20    | 31023777  | C   | T   | ASXL1  | c.C3262T     | p.Q1088X  | stopgain             | 0.093 | 1606  |
| OAML254    | 20    | 31023360  | 0   | -   | ASXL1  | c.2845_2846  | p.G949fs  | frameshift deletion  | 0.011 | 1203  |
| OAML285    | 20    | 31024395  | C   | T   | ASXL1  | c.C3880T     | p.Q1294X  | stopgain             | 0.013 | 1663  |
| OAML121    | X     | 154348290 | G   | -   | BRCC3  | c.744delG    | p.L248fs  | frameshift deletion  | 0.070 | 472   |
| OAML238    | X     | 154348273 | G   | A   | BRCC3  | c.728-1G>A   |           | splicing             | 0.039 | 330   |
| OAML254    | X     | 154299812 | C   | T   | BRCC3  | c.C10T       | p.Q4X     | stopgain             | 0.043 | 536   |
| OAML036    | 11    | 119148949 | A   | T   | CBL    | c.A1169T     | p.D390V   | nonsynonymous SNV    | 0.020 | 565   |
| OAML243    | 11    | 119149248 | G   | A   | CBL    | c.G1256A     | p.C419Y   | nonsynonymous SNV    | 0.066 | 1161  |
| OAML051    | 7     | 101882758 | C   | T   | CUX1   | c.C3781T     | p.R1261X  | stopgain             | 0.011 | 1329  |
| OAML076    | 7     | 101891808 | G   | -   | CUX1   | c.4004delG   | p.G1335fs | frameshift deletion  | 0.019 | 1266  |
| OAML003    | 2     | 25468133  | G   | A   | DNMT3A | c.C1543T     | p.Q515X   | stopgain             | 0.023 | 778   |
| OAML005    | 2     | 25457242  | C   | T   | DNMT3A | c.G2645A     | p.R882H   | nonsynonymous SNV    | 0.043 | 1305  |
| OAML005    | 2     | 25471019  | G   | A   | DNMT3A | c.C742T      | p.Q248X   | stopgain             | 0.013 | 1373  |
| OAML057    | 2     | 25462017  | T   | C   | DNMT3A | c.A2390G     | p.N797S   | nonsynonymous SNV    | 0.041 | 1427  |
| OAML063    | 2     | 25457252  | T   | C   | DNMT3A | c.A2635G     | p.N879D   | nonsynonymous SNV    | 0.041 | 710   |
| OAML072    | 2     | 25466800  | G   | A   | DNMT3A | c.C1903T     | p.R635W   | nonsynonymous SNV    | 0.018 | 1011  |
| OAML094    | 2     | 25458644  | G   | -   | DNMT3A | c.2529delC   | p.G843fs  | frameshift deletion  | 0.122 | 1140  |
| OAML098    | 2     | 25462086  | T   | C   | DNMT3A | c.1867-2A>G  |           | splicing             | 0.012 | 677   |
| OAML117    | 2     | 25469072  | C   | -   | DNMT3A | c.1386delG   | p.A462fs  | frameshift deletion  | 0.014 | 1124  |
| OAML124    | 2     | 25463510  | G   | T   | DNMT3A | c.C2172A     | p.Y724X   | stopgain             | 0.013 | 915   |
| OAML126    | 2     | 25463562  | C   | T   | DNMT3A | c.G2120A     | p.G707D   | nonsynonymous SNV    | 0.023 | 914   |
| OAML137    | 2     | 25469139  | C   | T   | DNMT3A | c.G1319A     | p.W440X   | stopgain             | 0.039 | 1402  |
| OAML138    | 2     | 25464535  | A   | G   | DNMT3A | c.T1978C     | p.Y660H   | nonsynonymous SNV    | 0.046 | 1135  |
| OAML146    | 2     | 25463289  | T   | C   | DNMT3A | c.A2204G     | p.Y735C   | nonsynonymous SNV    | 0.011 | 1236  |
| OAML151    | 2     | 25463182  | G   | A   | DNMT3A | c.C2311T     | p.R771X   | stopgain             | 0.148 | 772   |
| OAML151    | 2     | 25461998  | C   | A   | DNMT3A | c.1952+1G>T  |           | splicing             | 0.024 | 765   |
| OAML151    | 2     | 25463548  | C   | T   | DNMT3A | c.G2134A     | p.D712N   | nonsynonymous SNV    | 0.010 | 973   |
| OAML194    | 2     | 25466773  | C   | T   | DNMT3A | c.G1930A     | p.A644T   | nonsynonymous SNV    | 0.011 | 831   |
| OAML235    | 2     | 25458637  | G   | A   | DNMT3A | c.C2536T     | p.Q846X   | stopgain             | 0.027 | 1196  |
| OAML242    | 2     | 25463596  | G   | A   | DNMT3A | c.C2086T     | p.Q696X   | stopgain             | 0.096 | 781   |
| OAML250    | 2     | 25463240  | G   | T   | DNMT3A | c.C2253A     | p.F751L   | nonsynonymous SNV    | 0.014 | 880   |
| OAML273    | 2     | 25470002  | A   | T   | DNMT3A | c.T1040A     | p.L347Q   | nonsynonymous SNV    | 0.010 | 882   |
| OAML285    | 2     | 25462007  | A   | -   | DNMT3A | c.2400delT   | p.G800fs  | frameshift deletion  | 0.060 | 1344  |
| OAML001    | 22    | 41526008  | G   | A   | EP300  | c.1282+1G>A  |           | splicing             | 0.019 | 216   |
| OAML263    | 7     | 148508719 | C   | G   | EZH2   | c.G1945C     | p.E649Q   | nonsynonymous SNV    | 0.011 | 616   |
| OAML025    | 9     | 5073770   | G   | T   | JAK2   | c.G1849T     | p.V617F   | nonsynonymous SNV    | 0.414 | 674   |
| OAML068    | 9     | 5073770   | G   | T   | JAK2   | c.G1849T     | p.V617F   | nonsynonymous SNV    | 0.397 | 708   |
| OAML116    | 9     | 5073770   | G   | T   | JAK2   | c.G1849T     | p.V617F   | nonsynonymous SNV    | 0.020 | 872   |
| OAML179    | 12    | 122012473 | G   | A   | KDM2B  | c.C283T      | p.R95X    | stopgain             | 0.010 | 1269  |
| OAML116    | 1     | 43815009  | G   | T   | MPL    | c.G1544T     | p.W515L   | nonsynonymous SNV    | 0.020 | 1282  |
| OAML265    | 17    | 29562641  | C   | T   | NF1    | c.C3721T     | p.R1241X  | stopgain             | 0.057 | 1149  |
| OAML270    | 1     | 115258744 | C   | T   | NRAS   | c.G38A       | p.G13D    | nonsynonymous SNV    | 0.019 | 1405  |
| OAML001    | X     | 133527983 | G   | A   | PHF6   | c.418+1G>A   |           | splicing             | 0.327 | 205   |
| OAML268    | X     | 133551278 | G   | A   | PHF6   | c.G914A      | p.C305Y   | nonsynonymous SNV    | 0.103 | 1094  |
| OAML268    | X     | 133551319 | C   | T   | PHF6   | c.C955T      | p.R319X   | stopgain             | 0.016 | 740   |
| OAML268    | X     | 133527636 | C   | T   | PHF6   | c.C346T      | p.R116X   | stopgain             | 0.015 | 954   |
| OAML268    | X     | 133551203 | G   | A   | PHF6   | c.G839A      | p.C280Y   | nonsynonymous SNV    | 0.014 | 871   |
| OAML269    | X     | 133551305 | T   | C   | PHF6   | c.T941C      | p.I314T   | nonsynonymous SNV    | 0.030 | 1059  |
| OAML269    | X     | 133549137 | G   | A   | PHF6   | c.G821A      | p.R274Q   | nonsynonymous SNV    | 0.030 | 1140  |
| OAML007    | 17    | 58740498  | C   | G   | PPM1D  | c.C1403G     | p.S468X   | stopgain             | 0.019 | 1048  |
| OAML021    | 17    | 58740432  | C   | A   | PPM1D  | c.C1337A     | p.S446X   | stopgain             | 0.017 | 1213  |
| OAML042    | 17    | 58740737  | A   | T   | PPM1D  | c.A1642T     | p.K548X   | stopgain             | 0.055 | 904   |
| OAML047    | 17    | 58740749  | C   | T   | PPM1D  | c.C1654T     | p.R552X   | stopgain             | 0.015 | 1208  |
| OAML064    | 17    | 58740749  | C   | T   | PPM1D  | c.C1654T     | p.R552X   | stopgain             | 0.158 | 843   |
| OAML064    | 17    | 58740710  | G   | T   | PPM1D  | c.G1615T     | p.E539X   | stopgain             | 0.021 | 780   |
| OAML095    | 17    | 58740432  | C   | G   | PPM1D  | c.C1337G     | p.S446X   | stopgain             | 0.048 | 1192  |
| OAML095    | 17    | 58740375  | G   | A   | PPM1D  | c.G1280A     | p.W427X   | stopgain             | 0.011 | 1039  |
| OAML229    | 17    | 58740543  | C   | -   | PPM1D  | c.1448delC   | p.T483fs  | frameshift deletion  | 0.020 | 984   |
| OAML236    | 17    | 58740707  | -   | C   | PPM1D  | c.1612_1613  | p.L538fs  | frameshift insertion | 0.091 | 1018  |
| OAML259    | 17    | 58740809  | C   | T   | PPM1D  | c.C1714T     | p.R572X   | stopgain             | 0.016 | 1088  |
| OAML288    | 17    | 58740518  | G   | T   | PPM1D  | c.G1423T     | p.E475X   | stopgain             | 0.101 | 1598  |
| OAML013    | 12    | 112924357 | G   | A   | PTPN11 | c.G1303A     | p.V435M   | nonsynonymous SNV    | 0.415 | 978   |
| OAML099    | 12    | 112910775 | C   | T   | PTPN11 | c.C784T      | p.L262F   | nonsynonymous SNV    | 0.017 | 931   |
| OAML155    | 12    | 112888172 | A   | G   | PTPN11 | c.A188G      | p.Y63C    | nonsynonymous SNV    | 0.020 | 1033  |
| OAML231    | 12    | 112926270 | C   | T   | PTPN11 | c.C1403T     | p.T468M   | nonsynonymous SNV    | 0.066 | 1138  |
| OAML235    | 8     | 117868978 | -   | A   | RAD21  | c.720dupT    | p.I241fs  | frameshift insertion | 0.024 | 1009  |
| OAML076    | 21    | 36206763  | -   | T   | RUNX1  | c.748_749ins | p.R250fs  | frameshift insertion | 0.012 | 1368  |
| OAML038    | 18    | 42531907  | G   | A   | SETBP1 | c.G2602A     | p.D868N   | nonsynonymous SNV    | 0.254 | 993   |

| subject_id | chrom | pos_start | ref | var | gene  | cdna        | aa        | Result              | VAF   | Depth |
|------------|-------|-----------|-----|-----|-------|-------------|-----------|---------------------|-------|-------|
| OAML136    | 2     | 198267484 | G   | A   | SF3B1 | c.C1873T    | p.R625C   | nonsynonymous SNV   | 0.050 | 1198  |
| OAML241    | 2     | 198267707 | A   | G   | SF3B1 | c.T1772C    | p.V591A   | nonsynonymous SNV   | 0.163 | 975   |
| OAML285    | 2     | 198267339 | A   | G   | SF3B1 | c.T2018C    | p.I673T   | nonsynonymous SNV   | 0.014 | 1324  |
| OAML118    | 17    | 74732960  | G   | C   | SRSF2 | c.C283G     | p.P95A    | nonsynonymous SNV   | 0.022 | 1433  |
| OAML076    | X     | 123197719 | C   | T   | STAG2 | c.C1843T    | p.Q615X   | stopgain            | 0.015 | 533   |
| OAML274    | X     | 123185246 | T   | G   | STAG2 | c.1196+2T>G |           | splicing            | 0.078 | 180   |
| OAML038    | 4     | 106196291 | C   | T   | TET2  | c.C4624T    | p.Q1542X  | stopgain            | 0.332 | 1079  |
| OAML094    | 4     | 106197242 | A   | -   | TET2  | c.5575delA  | p.I1859fs | frameshift deletion | 0.016 | 1354  |
| OAML104    | 4     | 106193727 | 0   | -   | TET2  | c.4189_4190 | p.T1397fs | frameshift deletion | 0.039 | 484   |
| OAML104    | 4     | 106156593 | T   | -   | TET2  | c.1494delT  | p.V498fs  | frameshift deletion | 0.019 | 697   |
| OAML114    | 4     | 106162543 | G   | C   | TET2  | c.G3457C    | p.A1153P  | nonsynonymous SNV   | 0.012 | 1052  |
| OAML119    | 4     | 106180840 | T   | C   | TET2  | c.T3868C    | p.S1290P  | nonsynonymous SNV   | 0.012 | 836   |
| OAML137    | 4     | 106190860 | C   | T   | TET2  | c.C4138T    | p.H1380Y  | nonsynonymous SNV   | 0.032 | 1275  |
| OAML139    | 4     | 106164772 | C   | T   | TET2  | c.C3640T    | p.R1214W  | nonsynonymous SNV   | 0.063 | 1233  |
| OAML155    | 4     | 106157856 | C   | G   | TET2  | c.C2757G    | p.Y919X   | stopgain            | 0.013 | 1205  |
| OAML179    | 4     | 106197387 | T   | A   | TET2  | c.T5720A    | p.M1907K  | nonsynonymous SNV   | 0.024 | 1228  |
| OAML240    | 4     | 106193892 | C   | T   | TET2  | c.C4354T    | p.R1452X  | stopgain            | 0.013 | 1009  |
| OAML243    | 4     | 106157896 | 0   | -   | TET2  | c.2797_2800 | p.Q933fs  | frameshift deletion | 0.017 | 1363  |
| OAML254    | 4     | 106197348 | C   | G   | TET2  | c.C5681G    | p.P1894R  | nonsynonymous SNV   | 0.039 | 1027  |
| OAML285    | 4     | 106157420 | C   | A   | TET2  | c.C2321A    | p.S774X   | stopgain            | 0.039 | 1421  |
| OAML285    | 4     | 106196705 | C   | T   | TET2  | c.C5038T    | p.Q1680X  | stopgain            | 0.018 | 1590  |
| OAML013    | 17    | 7577539   | G   | A   | TP53  | c.C742T     | p.R248W   | nonsynonymous SNV   | 0.035 | 938   |
| OAML033    | 17    | 7577517   | A   | C   | TP53  | c.T764G     | p.I255S   | nonsynonymous SNV   | 0.012 | 1243  |
| OAML049    | 17    | 7577534   | C   | G   | TP53  | c.G747C     | p.R249S   | nonsynonymous SNV   | 0.016 | 1141  |
| OAML064    | 17    | 7578265   | A   | G   | TP53  | c.T584C     | p.I195T   | nonsynonymous SNV   | 0.013 | 869   |
| OAML067    | 17    | 7578556   | T   | C   | TP53  | c.259-2A>G  |           | splicing            | 0.014 | 802   |
| OAML137    | 17    | 7577538   | C   | T   | TP53  | c.G743A     | p.R248Q   | nonsynonymous SNV   | 0.054 | 1262  |
| OAML179    | 17    | 7578203   | C   | T   | TP53  | c.G646A     | p.V216M   | nonsynonymous SNV   | 0.027 | 1165  |
| OAML288    | 17    | 7578393   | A   | T   | TP53  | c.T537A     | p.H179Q   | nonsynonymous SNV   | 0.022 | 1712  |
| OAML270    | 11    | 32417910  | G   | T   | WT1   | c.C1142A    | p.S381X   | stopgain            | 0.014 | 1419  |
| OAML035    | X     | 15833949  | T   | -   | ZRSR2 | c.707delT   | p.F236fs  | frameshift deletion | 0.292 | 850   |
| OAML237    | X     | 15836766  | G   | A   | ZRSR2 | c.827+1G>A  |           | splicing            | 0.011 | 461   |

Table S15. Likelihood of mutation persistence by gene mutated at AML diagnosis.

Shown are all genes mutated at the time of AML diagnosis in at least 5 individuals with available remission samples. Significant associations ( $P < 0.05$ ) are highlighted in gray. Note that *DDX41* mutations shown here include only putative somatic mutations.

| Gene            | N, persisting | N, diagnosis | %  | OR for persistence | 95% CI     | P value |
|-----------------|---------------|--------------|----|--------------------|------------|---------|
| <i>ASXL1</i>    | 30            | 38           | 79 | 3.5                | 1.6-7.7    | 0.0016  |
| <i>BCOR</i>     | 23            | 13           | 57 | 1.5                | 0.66-3.4   | 0.40    |
| <i>BCORL1</i>   | 3             | 8            | 38 | 0.67               | 0.18-2.6   | 0.73    |
| <i>CBL</i>      | 6             | 2            | 33 | 0.6                | 0.1-2.4    | 0.69    |
| <i>CEBPA</i>    | 1             | 16           | 6  | 0.07               | 0.006-0.43 | 0.0006  |
| <i>DDX41</i>    | 2             | 9            | 22 | 0.3                | 0.06-1.4   | 0.18    |
| <i>DNMT3A</i>   | 55            | 66           | 83 | 6.6                | 3.4-12.7   | <0.0001 |
| <i>EZH2</i>     | 5             | 12           | 42 | 0.81               | 0.29-2.3   | 0.78    |
| <i>FLT3-ITD</i> | 11            | 58           | 19 | 0.24               | 0.12-0.46  | <0.0001 |
| <i>FLT3-TKD</i> | 2             | 10           | 20 | 0.29               | 0.06-1.1   | 0.11    |
| <i>GATA2</i>    | 2             | 10           | 20 | 0.29               | 0.06-1.1   | 0.11    |
| <i>IDH1</i>     | 12            | 24           | 50 | 1.1                | 0.5-2.6    | 0.84    |
| <i>IDH2</i>     | 16            | 28           | 57 | 1.6                | 0.7-3.3    | 0.33    |
| <i>JAK2</i>     | 4             | 8            | 50 | 1.1                | 0.3-3.8    | >0.99   |
| <i>KRAS</i>     | 4             | 21           | 19 | 0.25               | 0.09-0.76  | 0.013   |
| <i>NF1</i>      | 5             | 7            | 71 | 2.8                | 0.6-14.1   | 0.27    |
| <i>NPM1</i>     | 4             | 43           | 9  | 0.1                | 0.04-0.28  | <0.0001 |
| <i>NRAS</i>     | 6             | 28           | 21 | 0.30               | 0.13-0.73  | 0.0064  |
| <i>PHF6</i>     | 3             | 11           | 27 | 0.4                | 0.12-1.4   | 0.23    |
| <i>PTPN11</i>   | 7             | 23           | 30 | 0.49               | 0.19-1.2   | 0.14    |
| <i>RUNX1</i>    | 24            | 53           | 45 | 0.94               | 0.54-1.7   | 0.89    |
| <i>SF3B1</i>    | 6             | 7            | 86 | 6.7                | 1.1-77.6   | 0.057   |
| <i>SRSF2</i>    | 20            | 32           | 63 | 2.0                | 0.94-4.0   | 0.072   |
| <i>STAG2</i>    | 10            | 24           | 42 | 0.81               | 0.37-1.8   | 0.68    |
| <i>TET2</i>     | 47            | 61           | 77 | 4.2                | 2.3-7.8    | <0.0001 |
| <i>TP53</i>     | 20            | 26           | 77 | 3.8                | 1.5-9.1    | 0.0036  |
| <i>U2AF1</i>    | 12            | 15           | 80 | 4.6                | 1.4-15.2   | 0.016   |
| <i>WT1</i>      | 3             | 17           | 18 | 0.23               | 0.07-0.79  | 0.024   |

Table S16. Comparison of molecular and flow-cytometry based MRD assessments.

87 patients in the remission cohort had data available from clinical evaluation of MRD by flow cytometry. This table shows the results of a comparison between these assessments (“Flow MRD”) and results of remission sample sequencing (“molecular MRD”).

|                | Flow MRD+ | Flow MRD- |
|----------------|-----------|-----------|
| Molecular MRD+ | 21        | 32        |
| Molecular MRD- | 5         | 29        |

Table S17. Univariable and multivariable associations with MRD positivity

|                     |                      | Univariable Logistic |          |         | Multivariable Logistic |          |         |
|---------------------|----------------------|----------------------|----------|---------|------------------------|----------|---------|
|                     |                      | OR                   | 95% CI   | P value | OR                     | 95% CI   | P value |
| sAML                | Y vs N               | 1.9                  | 1.0-3.7  | 0.05    | 1.0                    | 0.4-2.2  | 0.98    |
| CRi                 | Y vs N               | 4.5                  | 1.9-10.8 | 0.0006  | 3.7                    | 1.5-9.1  | 0.0048  |
| Prior HMA           | Y vs N               | 3.4                  | 1.2-9.6  | 0.023   | 1.4                    | 0.4-5.2  | 0.63    |
| Intensive induction | Y vs N               | 3.0                  | 1.2-7.8  | 0.021   | 1.1                    | 0.4-3.2  | 0.91    |
| Any consolidation   | Y vs N               | 0.5                  | 0.3-1.0  | 0.052   | 0.7                    | 0.4-1.6  | 0.44    |
| Cytogenetic risk    | Int vs Low           | 2.5                  | 1.0-6.3  | 0.048   | 1.8                    | 0.7-4.8  | 0.2     |
|                     | High vs Low          | 6.4                  | 1.4-28.9 | 0.016   | 5.7                    | 1.2-26.6 | 0.027   |
| Molecular ontogeny  | Secondary vs De Novo | 8.0                  | 3.9-16.4 | <0.0001 | 7.9                    | 3.6-17.0 | <0.0001 |
|                     | P53 vs De Novo       | 8.4                  | 2.6-27.0 | 0.0003  | 7.7                    | 2.3-26.0 | 0.001   |

Figure S1. Post-transplant outcomes of the full cohort.

Shown are overall survival and leukemia-free survival (A), as well as cumulative incidence of relapse and cumulative incidence of non-relapse mortality (B) for full cohort.

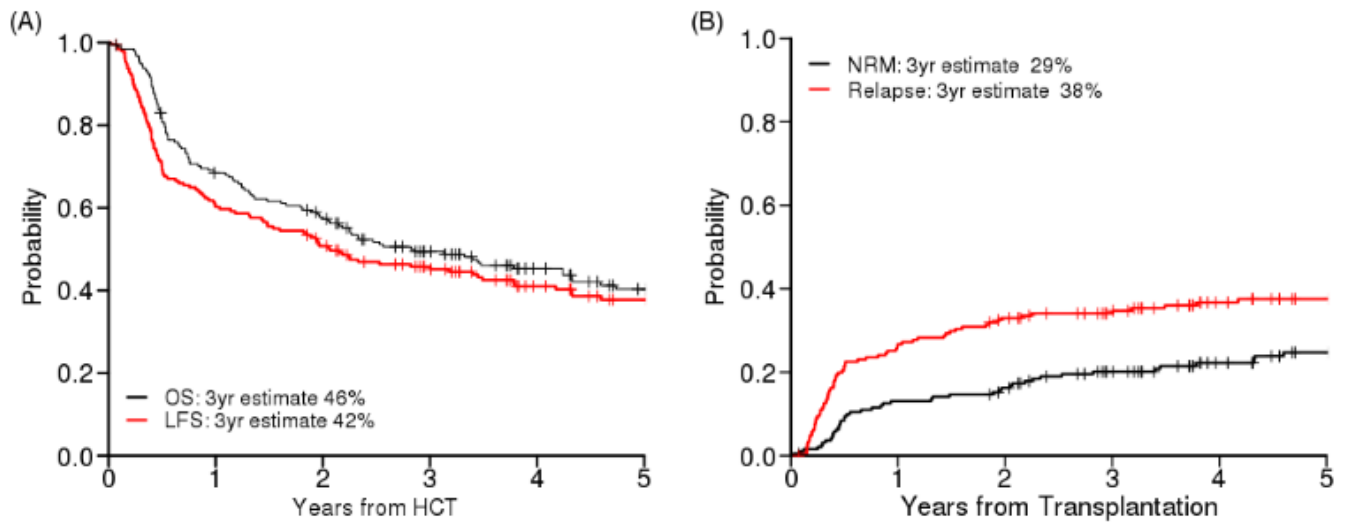



Figure S2. Outcomes by molecular risk group.

Shown are outcomes for patients with unfavorable genetics (*TP53* mutation, *JAK2* mutation, or *FLT3-ITD* without an *NPM1* mutation), favorable genetics (absence of unfavorable mutation plus either *NPM1* mutation without *FLT3-ITD*, *DDX41* mutation, or *DNMT3A* mutation), and intermediate genetics (all others).

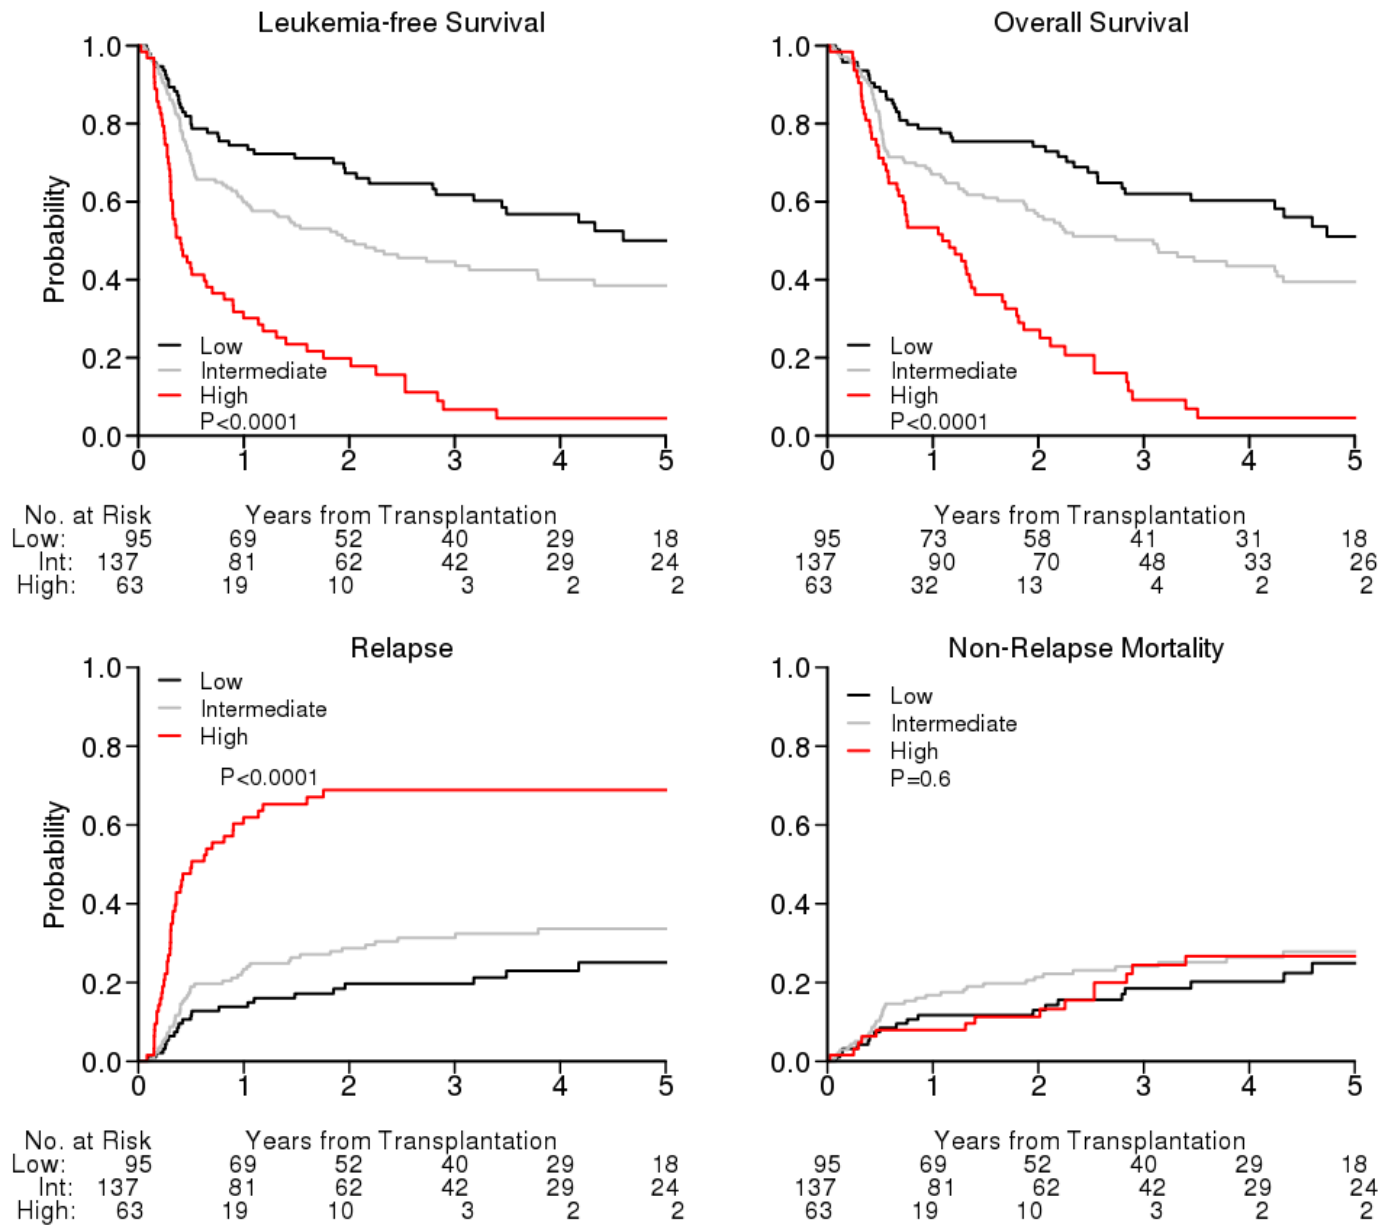

Figure S3. Likelihood of mutation persistence by gene using ELN definition of MRD

This figure shows the results of Fisher's exact test for clearance or persistence of mutations in each gene, plotting the odds of clearance on the x axis and significance, expressed as the negative log of the uncorrected P value, on the y axis. Mutations that are more likely to persist at remission appear towards the left, and those that are more likely to clear appear towards the right. Panel B shows the variant allele frequency (VAF) of remission mutations. Median VAF is denoted by a black dashed line, and the range is indicated by the red violin plot for each gene. This analysis is limited to the 326 persistent mutations with VAF  $\geq 0.001$ , consistent with ELN guidelines for molecular MRD in AML.

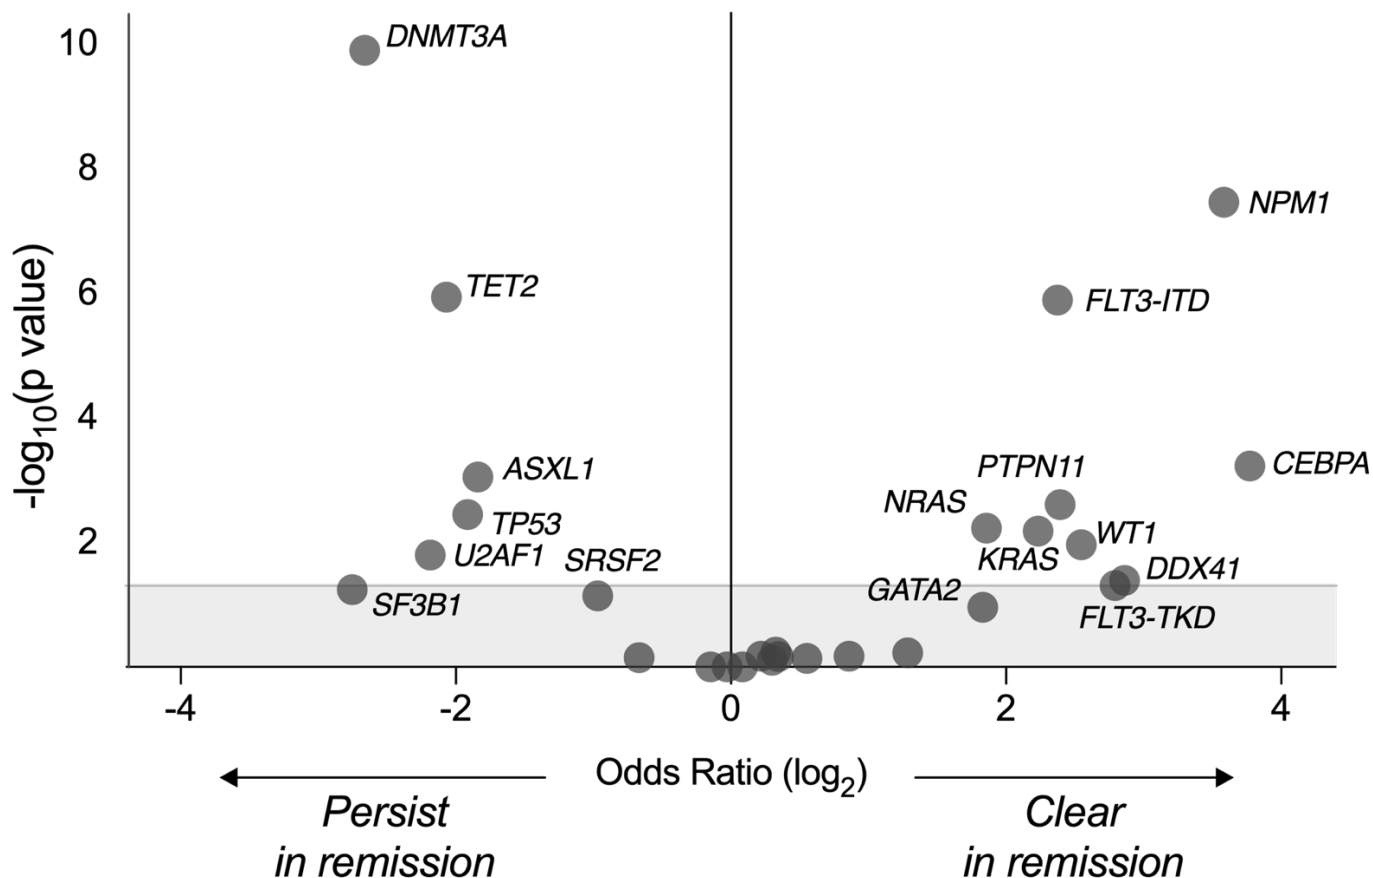

Figure S4. Clonal abundance of persistent mutations

Shown is the maximum variant allele fraction (VAF) for each patient with molecular residual disease (detectable diagnostic mutations in genes other than *DNMT3A* or *TET2*). Patients are grouped by the molecular ontogeny of their leukemia. *TP53* ontogeny includes all patients with *TP53* mutations at the time of diagnosis; secondary ontogeny includes all patients with mutations in *SRSF2*, *SF3B1*, *U2AF1*, *ZRSR2*, *ASXL1*, *BCOR*, *BCORL1*, *EZH2*, or *STAG2* at the time of diagnosis; pan-AML/*de novo* ontogeny includes all other patients. The median VAF of persistent mutations for patients with *TP53* ontogeny was 0.113, for those with secondary-type ontogeny was 0.042, and for those with pan-AML/*de novo* ontogeny was 0.021. Unadjusted P-values are from the Wilcoxon rank-sum test.

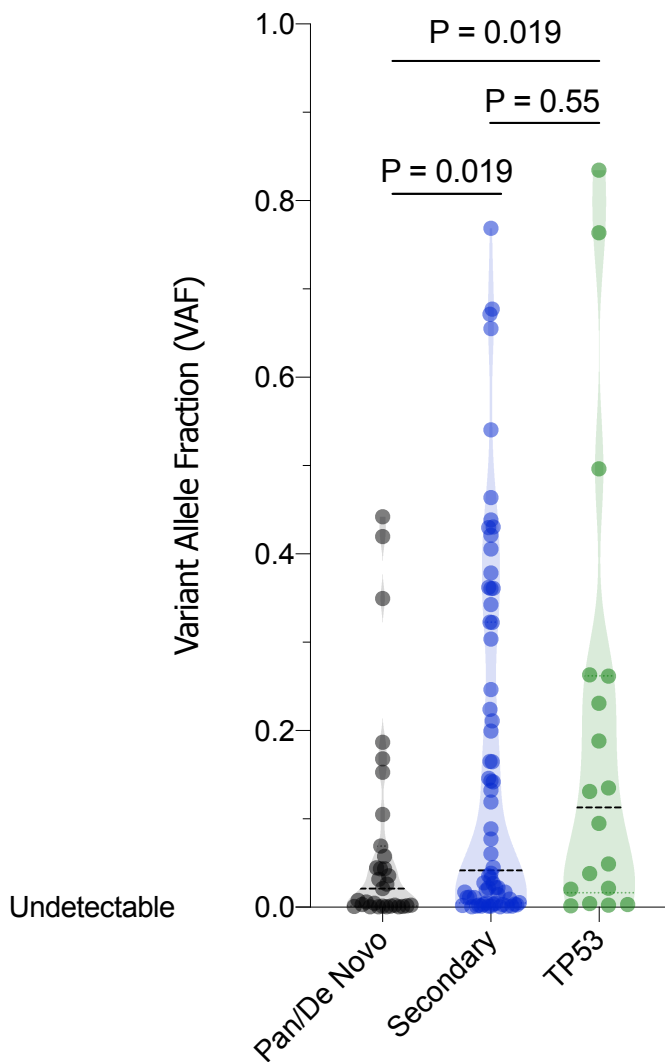

Figure S5. Leukemia-free survival by MRD status using ELN definition.

This figure shows unadjusted LFS for all remission cohort patients (N = 192) according to MRD status defined by ELN criteria (at least one mutation VAF  $\geq$  0.001).

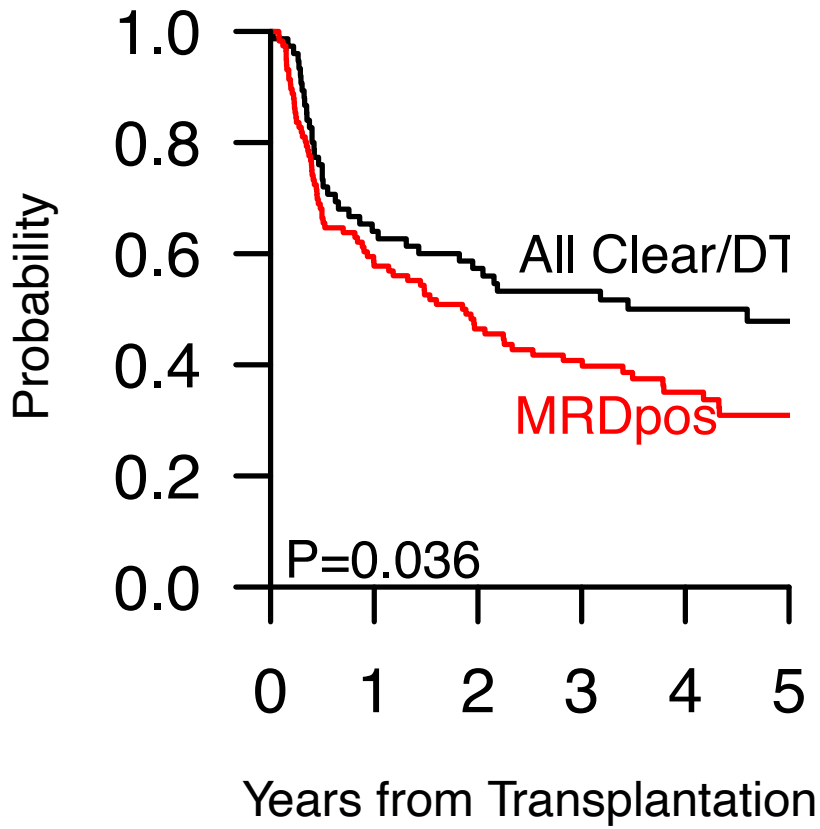

Figure S6. Incidence of relapse using DTA as MRD-negative equivalent.

In our study, we defined remissions with only persistent *DNMT3A* or *TET2* mutations (“DT”) as equivalent to an MRD-negative remission. Previous studies of MRD in AML have also included sole remission mutations in *ASXL1* (with/without *DNMT3A* or *TET2*, but without other mutations) in this definition. In this cohort, 6 patients classified as MRD positive using a DT only definition would have been reclassified as MRD-negative using a DTA definition. This figure shows the rates of relapse using the DT definition (left), as in the text, or DTA definition (right).

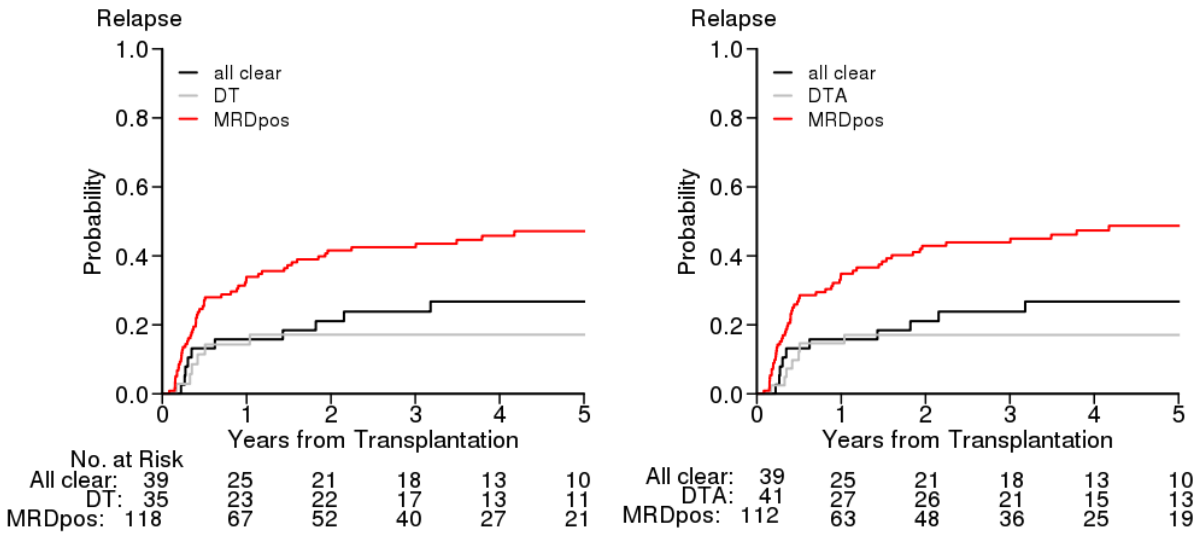

Supplement: bloodBLD2021014520-suppl1.pdf [file bloodBLD2021014520-suppl1.pdf]
